1 **Engineering transcription factor BmoR mutants for constructing multifunctional**

2 **alcohol biosensors**

3 Tong Wu<sup>#</sup>, Zhenya Chen<sup>#</sup>, Cuiying Zhang, Yi-Xin Huo<sup>\*</sup>

4

5 **Abstract**

6 Native transcription factor-based biosensors (TFBs) have the potential for in situ detection  
7 of value-added chemicals or byproducts. However, their industrial application is limited by  
8 their ligand promiscuity, low sensitivity, and narrow detection range. Alcohols exhibit  
9 similar structures, and no reported TFB can distinguish a specific alcohol from its analogs.  
10 Here, we engineered an alcohol-regulated transcription factor, BmoR, and obtained various  
11 mutants with remarkable properties. For example, the generated signal-molecule-specific  
12 BmoRs could distinguish the constitutional isomers n-butanol and isobutanol, with  
13 insensitivity up to an ethanol concentration of 800 mM (36.9 g/L). Linear detection of 0–  
14 60 mM of a specific higher alcohol could be achieved in the presence of up to 500 mM  
15 (23.0 g/L) ethanol as background noise. Notably, two mutants with raised outputs and over  
16  $1.0 \times 10^7$ -fold higher sensitivity, and one mutant with an increased upper detection limit  
17 (14.8 g/L n-butanol or isobutanol) were screened out. Using BmoR as an example, this  
18 study systematically explored the ultimate detection limit of a TFB towards its small-  
19 molecule ligands, paving the way for in situ detection in the biofuel and wine industries.

20 **Keywords:** transcription factor, BmoR, biosensor, specificity, high sensitivity, wider  
21 detection

22

## 23 **Introduction**

24 Upon sensing specific signal molecules, transcription factors (TFs) can bind or unbind to  
25 the DNA-regulatory sequences of target genes to induce or repress gene transcription. TFs  
26 can be utilized as biosensors by coupling the transcriptional alteration with the expression  
27 of a reporter protein<sup>1</sup>. Transcription factor-based biosensors (TFB) have been designed and  
28 constructed to detect toxic metals<sup>2</sup>, regulate metabolic flux<sup>3,4</sup>, and screen highly active  
29 enzymes<sup>5</sup> or chemical overproducers<sup>6,7</sup>. However, several drawbacks limit the industrial  
30 applications of TFBs. First, TFB signaling can be saturated by the medium concentration  
31 of intracellular signal products and cannot distinguish chemical overproducers from  
32 producers<sup>8</sup>. Second, TFBs can be interfered by the byproducts, which are structurally  
33 similar to the products<sup>9</sup>. Third, in many cases, TFBs are not sensitive enough to detect low  
34 concentrations of value-added chemicals<sup>10,11</sup>. Therefore, it is necessary to develop TFBs  
35 with low ligand promiscuity, high sensitivity, and a wide detection range.

36

37 n-Butanol and isobutanol are considered as promising substitutes for gasoline because of  
38 their special properties<sup>12</sup>. Butanols are also crucial precursors for the production of plastics  
39 and polymers<sup>13</sup>. Metabolic engineering has been used to produce n-butanol and isobutanol  
40 in various hosts<sup>14-22</sup>. However, an efficient TFB with low ligand promiscuity, high  
41 sensitivity, and a wide detection range has yet to be achieved for in situ detection and high-  
42 throughput screening. *Pseudomonas butanovora* BmoR is an activated transcription factor  
43 that belongs to the bacterial enhancer-binding proteins (bEBPs) and can induce the

44 transcription of  $\sigma^{54}$ -dependent  $P_{bmo}$  promoter by combining with C2-C5 n-alcohols<sup>23, 24</sup>.

45 The activation mechanism of BmoR is shown in Fig. 1A. The N-terminal, central domain,

46 and C-terminal of BmoR are responsible for sensing and combining the signal molecules,

47 contacting the  $\sigma^{54}$  factor of holoenzyme and hydrolyzing ATP, and binding to the upstream

48 sequence of the  $\sigma^{54}$ -dependent promoter, respectively<sup>24</sup>. Native BmoR has been shown to

49 respond to C3-C5 alcohols, and a BmoR-based biosensor has been utilized to screen n-

50 butanol or isobutanol producers<sup>10</sup>.

51

52 In this study, we aimed to obtain efficient BmoR mutants with specificity, high sensitivity,

53 and a wide detection range towards special higher alcohols for the purpose of in situ

54 detection and high-throughput screening. The development of a biosensor that was

55 sensitive to butanols but completely insensitive to 0–36 g/L ethanol was another significant

56 purpose of this study. This type of biosensor is urgently needed in the wine industry for the

57 in situ detection of byproducts (n-butanol or isobutanol) production without interfering

58 with ethanol production. Here, we utilized error-prone PCR to construct a BmoR random

59 mutagenesis library based on the understanding of the BmoR N-terminal and a variety of

60 BmoR mutants with desired properties, such as specificity, sensitivity or a wide detection

61 range were obtained and are shown in Table 1. These mutants could be widely utilized in

62 various fields, including metabolic regulation, enzyme or production strain screening, and

63 byproduct detection.

64

## 65 **Results and discussion**

### 66 **Analysis of the wild-type BmoR structure and establishment of the mutagenesis** 67 **library**

68 We first analyzed the binding regions of different molecules and attempted to utilize  
69 rational design to endow BmoR with signal-molecule specificity. In our previous study, the  
70 biofilm regulator FleQ (PDB code: 5EXP) and the transcription factor PobR (PDB code:  
71 5W1E) were used as templates to simulate wild-type BmoR (Fig. 1B). In this study,  
72 molecular docking of BmoR with different alcohols (n-butanol, isobutanol, ethanol, and  
73 glycol) was conducted. The results in Fig. 1C show that the binding pockets of different  
74 signal molecules were similar, and the signal molecules bound to BmoR mainly via the  
75 formation of hydrogen bonds with Arg211, Gln212, and Asn259. We first performed site-  
76 saturation mutagenesis at these sites. The generated mutants had decreased response values  
77 when compared to the wild-type (Fig. S1A, B, and C) and did not display signal-molecule  
78 specificity. These results suggest the complexity of the response mechanisms of BmoR and  
79 indicate that obtaining BmoR with desirable properties cannot be easily achieved through  
80 rational design. Therefore, we performed random mutagenesis of BmoR. The N-terminus  
81 of BmoR is responsible for recognizing and binding signal molecules and modulating the  
82 activity of bEBP<sup>25,26</sup>. Modifying the region could directly influence the response of BmoR  
83 to the signal molecule and further change its properties. Therefore, error-prone PCR was  
84 conducted at the N-terminal of BmoR to endow BmoR with desirable properties. After  
85 screening the mutagenesis library, we acquired 400 colonies that had different GFP values

86 when compared with wild-type BmoR. The *bmoR* genes in these colonies were then  
87 extracted and sequenced.

88

89 Besides, we assumed the initiation mechanism of BmoR. BmoR and NtrC could both  
90 activate the  $\sigma^{54}$ -dependent transcription. The regulatory mechanism of NtrC was positive  
91 regulation<sup>27</sup>. In our previous study we have proved that the regulatory mechanism of BmoR  
92 was also positive regulation<sup>24</sup>. Therefore, we speculated the initiation mechanism of BmoR  
93 might be similar to NtrC because of their structural and functional similarity. To induce the  
94 transcription, BmoR might be firstly expressed and formed as dimers. The dimers of BmoR  
95 would then capture the signal molecules and the  $\sigma^{54}$  of  $\sigma^{54}$ -RNAP holoenzyme ( $E\sigma^{54}$ )  
96 would bind to the -24 (GG) and -12 (TGC) regions of  $\sigma^{54}$ -dependent promoter ( $P_{bmo}$ ). After  
97 that, the dimers with signal molecules would form as hexamer to initiate the transcription  
98 of  $P_{bmo}$  with the energy which would be released by ATP hydrolysis. The whole activation  
99 process was shown in Fig. S2. The true regulation mechanism of BmoR needed to be  
100 exploited by crystallization of BmoR with signal molecules and in-depth analysis of the  
101 generated structures.

102

### 103 **Specific response of BmoR mutants towards n-butanol**

104 We isolated two special mutants (W21R/E54V and I183T/D273N) that show a significant  
105 response towards 10 mM of n-butanol and a weak response towards 10 mM of isobutanol  
106 (Fig. 2A). The GFP/OD<sub>600</sub> values of W21R/E54V and I183T/D273N towards n-butanol

107 were  $92.4 \pm 14$  and  $15.6 \pm 0.8$ , respectively. A series of gradient addition experiments with  
108 different concentrations of n-butanol or isobutanol were carried out to measure the apparent  
109  $K_m$  value and to verify the detection potential of these two mutants. Significantly, the  
110 GFP/OD<sub>600</sub> values of W21R/E54V and I183T/D273N increased with the increase of n-  
111 butanol concentration (Fig. 2B), and the response values of W21R/E54V and  
112 I183T/D273N reached  $325 \pm 17$  and  $147 \pm 12$  when 100 mM n-butanol was added to the  
113 culture, respectively, while the response values of these two mutants have no obvious  
114 change with the increase of isobutanol concentration (Fig. 2C). These results suggest that  
115 W21R/E54V and I183T/D273N could perceive the change of n-butanol concentration and  
116 further give the corresponding response, and exhibited insensitivity towards isobutanol. In  
117 addition, the apparent  $K_m$  value of W21R/E54V was 42.6 mM towards n-butanol. The  
118 response value of I183T/D273N was linear to the concentration of n-butanol. Based on the  
119 above results, we verified the mutants W21R/E54V and I183T/D273N as n-butanol-  
120 specific BmoR mutants.

121

122 In addition, simulation and molecular docking of W21R/E54V and I183T/D273N with  
123 isobutanol or n-butanol were conducted. The model in Fig. 2D shows that a hydrogen bond  
124 was formed between n-butanol and the 261<sup>st</sup> glutamate of W21R/E54V, and there was no  
125 force between isobutanol and W21R/E54V, suggesting that the interaction between n-  
126 butanol and W21R/E54V was stronger than that between isobutanol and W21R/E54V. In  
127 addition, we mutated the 261<sup>st</sup> glutamate to the other 19 amino acids. The generated 19

128 mutants have significantly lower response values when compared with W21R/E54V, which  
129 demonstrates the significance of Glu261 in the response to n-butanol (Fig. S3). Similar to  
130 W21R/E54V, two hydrogen bonds between n-butanol and I183T/D273N were observed in  
131 the complex, and no force was formed between isobutanol and I183T/D273N,  
132 demonstrating that n-butanol could bind I183T/D273N tightly (Fig. 2E).

133

### 134 **Specific response of BmoR mutants towards isobutanol**

135 In addition to the n-butanol-specific BmoR mutants, two mutants (M94V/F272L and  
136 S240P) that significantly responded to 10 mM isobutanol and hardly responded to 10 mM  
137 n-butanol, were screened from the mutagenesis library (Fig. 3A). The results of the gradient  
138 addition experiment in Fig. 3B and C show that the GFP/OD<sub>600</sub> values of M94V/F272L  
139 and S240P exhibited an increasing trend with the increase of isobutanol concentration and  
140 had no significant change with the increase of n-butanol concentration. These distinct  
141 responses illustrated that M94V/F272L and S240P have the ability to perceive the change  
142 of isobutanol concentration and then output the corresponding response signal; on the  
143 contrary, they could not sense n-butanol. Hence, the mutants M94V/F272L and S240P  
144 could be considered as isobutanol-specific BmoR mutants.

145

146 Furthermore, complexes containing any of the above mutants and signal molecules (n-  
147 butanol or isobutanol) were modeled, and the interactions between mutated BmoR and the  
148 signal molecule were analyzed to explain the isobutanol specificity of M94V/F272L and



149 S240P. As shown in Fig. 3D, hydrophobic interactions existed between the signal molecule  
150 isobutanol and Phe276 of M94V/F272L; meanwhile, no interaction was observed in the  
151 complex of M94V/F272L and n-butanol. For the complexes of mutant S240P and signal  
152 molecules, isobutanol bound to S240P via the formation of a hydrogen bond at Glu261 and  
153 n-butanol did not interact with S240P (Fig. 3E). The interaction between the isobutanol-  
154 specific mutants and signal molecules proved the isobutanol specificity of the mutants.

155

#### 156 **Further verification of the specificity via the addition of mixed signal molecules**

157 To further confirm the specificity and test whether the two kinds of signal molecules  
158 competed to combine the mutants, the response of n-butanol-specific and isobutanol-  
159 specific BmoR mutants was measured by adding mixed signal molecules to the culture. We  
160 used an n-butanol-specific mutant (W21R/E54V) and an isobutanol-specific mutant  
161 (M94V/F272L) as examples to conduct the experiments. As shown in Fig. 4A, the  
162 GFP/OD<sub>600</sub> value of the n-butanol-specific mutant W21R/E54V increased with an increase  
163 in the n-butanol proportion, reaching  $342 \pm 7$  when the ratio of n-butanol to isobutanol in  
164 the culture was 10:1 (100 mM:10 mM). As a comparison, the GFP/OD<sub>600</sub> value of  
165 W21R/E54V did not change with the increase of isobutanol proportion. The response of  
166 W21R/E54V only varied with the change of n-butanol proportion, proving that there is no  
167 competition between n-butanol and isobutanol in the n-butanol-specific mutant and that  
168 W21R/E54V could maintain its specificity in the case of mixed signal molecules. Similar  
169 to W21R/E54V, the GFP/OD<sub>600</sub> value of M94V/F272L only varied with the change of the

170 isobutanol proportion. In summary, we screened n-butanol-specific BmoR mutants  
171 (W21R/E54V and I183T/D273N) and isobutanol-specific BmoR mutants (M94V/F272L  
172 and S240P) from the mutagenesis library, and these mutants showed satisfactory specificity.

173

#### 174 **BmoR mutants with higher output and sensitivity**

175 In addition to the above signal molecule-specific mutants, two mutants with higher outputs  
176 were isolated from the random mutagenesis library. The sequencing results show that these  
177 two mutants have mutations of E54G and V311A, respectively. Notably, mutant E54G have  
178 a 27.5-fold higher GFP/OD<sub>600</sub> value ( $1941 \pm 17$ ) towards 1 mM n-butanol and a 12.1-fold  
179 higher GFP/OD<sub>600</sub> value ( $1020 \pm 17$ ) towards 1 mM isobutanol when compared with wild-  
180 type BmoR. In comparison, the GFP/OD<sub>600</sub> values of V311A towards 1 mM n-butanol and  
181 1 mM isobutanol were 34.2- and 19.5-fold higher than wild-type BmoR, respectively (Fig.  
182 4B). Based on this, we assumed that these two mutants with higher output might respond  
183 to the low concentration of butanols, signifying that the mutants have higher sensitivity. To  
184 validate this assumption, we added 0–1 mM n-butanol or isobutanol to the culture to test  
185 the response of mutants E54G and V311A. The lower detection limit of BmoR was defined  
186 as the concentration of butanols that could achieve a maximum GFP/OD<sub>600</sub> value of 75%.  
187 Based on this, we estimated the lower detection limits of mutants E54G and V311A based  
188 on the Michaelis-Menten equation of Origin8.5. As shown in Fig. 4C and D, the lower  
189 detection limits of mutants E54G and V311A towards n-butanol were  $2.64 \times 10^{-6}$  mM and  
190  $2.13 \times 10^{-6}$  mM, respectively, which demonstrated that the sensitivity of these two mutants

191 towards n-butanol was over  $1.0 \times 10^7$ -fold higher than that of wild-type BmoR (28 mM).  
192 In comparison, mutants E54G and V311A have lower detection limits of  $2.16 \times 10^{-6}$  mM  
193 and  $1.94 \times 10^{-6}$  mM towards isobutanol, respectively, which suggests that these two  
194 mutants possess over  $1.0 \times 10^7$ -fold higher sensitivity to isobutanol when compared with  
195 wild-type BmoR (26 mM). In addition, we attempted to introduce the mutations in the  
196 mutant with high output into the signal molecule-specific mutants in order to enhance the  
197 response values of the signal molecule-specific mutants. However, the mutations in the  
198 mutant with high output did not significantly enhance the output of signal molecule-  
199 specific mutants (data not shown). Future work might focus on enhancing the sensitivity  
200 and output of signal molecule-specific mutants in order to sense the trace accumulation of  
201 butanols.

202

### 203 **BmoR mutant with wider detection range**

204 To utilize the BmoR-based biosensor to screen industrial high-level n-butanol or isobutanol  
205 production strains, we needed to broaden the detection range of BmoR. In this study, we  
206 screened out a mutant (T12N) with a wider detection range (0–200 mM) when compared  
207 with wild-type BmoR. Fig. 5A and B showed mutant T12N outputted significantly distinct  
208 GFP/OD<sub>600</sub> values when feeding the 150 mM and 200 mM butanol solutions and the  
209 apparent  $K_m$  values of T12N were 37.3 mM towards n-butanol and 89.9 mM towards  
210 isobutanol. These results suggest that the upper detection limit of mutant T12N could reach  
211 200 mM.

212 We then introduced mutant T12N into an isobutanol-producing strain to confirm its wider  
213 detection range for *in vivo* host-producing isobutanol. First, plasmids pYH10 and pYH10-  
214 T12N were individually introduced into the isobutanol-producing strain TW, resulting in  
215 strains TW1 and TW2, respectively. TW1 and TW2 were used for subsequent fermentation  
216 and GFP/OD<sub>600</sub> value detection. As shown in Fig. 5C and D, the GFP/OD<sub>600</sub> value of strain  
217 TW2 with T12N BmoR expression displayed an upward trend as the isobutanol titer during  
218 the 84-hour fermentation. The GFP/OD<sub>600</sub> values at 72 h and 84 h were significantly  
219 different, and the value at 84 h reached  $835 \pm 25$ . Meanwhile, 215 mM isobutanol was  
220 accumulated in the culture. In comparison, the GFP/OD<sub>600</sub> value of strain TW1 with wild-  
221 type BmoR expression increased with the production of isobutanol in the first 36 h, and the  
222 isobutanol titer was 67 mM at 36 h. In the next 48 h, isobutanol was continuously produced.  
223 However, the GFP/OD<sub>600</sub> value of TW1 did not increase significantly. These results  
224 illustrate that mutant T12N demonstrates a wider detection range (0–200 mM) towards *in*  
225 *vivo* host-producing isobutanol, and this mutant could be used to construct a sensor to  
226 screen overproducers.

227

### 228 **BmoR mutants with ethanol insensitivity**

229 In the ethanol fermentation industry, n-butanol and isobutanol are usually produced as  
230 byproducts. We assumed that the BmoR-based biosensor could serve as a powerful tool to  
231 detect the accumulation of higher alcohols in ethanol-producing strains. However, native  
232 BmoR showed a significant response to ethanol, which could induce signal interference

233 and lead to inaccurate measurement of higher alcohol concentrations. Therefore, a  
234 biosensor that is insensitive to ethanol and sensitive to higher alcohols needs to be urgently  
235 explored. Fortunately, the abovementioned two n-butanol-specific mutants and two  
236 isobutanol-specific mutants did not respond to 0–200 mM ethanol (Fig. S4). The apparent  
237  $K_m$  values of mutants W21R/E54V and I183T/D273N towards ethanol were 228 and 174  
238 mM, respectively, which were 23.5- and 17.9-fold higher than that of the wild-type.  
239 Similarly, mutants M94V/F272L and S240P possess 13.6- and 12.1-fold higher apparent  
240  $K_m$  towards ethanol when compared with the wild type, respectively. The insensitivity of  
241 these mutants to ethanol was maintained at a concentration of 800 mM (Fig. 5E). The  
242 complexes in Fig. S5 show that there was no interaction between any of the  
243 abovementioned mutants and ethanol. Notably, W21R/E54V and M94V/F272L maintained  
244 their respective specificities even with background interference of 500 mM ethanol (Fig.  
245 5F). In addition, we tested the response of special BmoR mutants to other alcohols  
246 including methanol, glycol, isopropanol, isopentanol, and 2-methyl-1-pentanol. Fig. S6  
247 shows that mutant T12N could respond to the abovementioned alcohols as well as wild-  
248 type BmoR, and mutant W21R/E54V has a narrower signal molecule range when  
249 compared with wild-type BmoR, suggesting that mutations in the mutants influenced the  
250 range of signal molecules.

251

252 The promiscuity of TFs is a double-edged sword. On the one hand, promiscuity could  
253 provide some benefits. For instance, TFs with promiscuity can expand the signal

254 molecule spectrum. On the other hand, the signal molecule diversity of TFBs could result  
255 in an inaccurate response. Many studies have engineered biosensors to realize specific  
256 responses <sup>28, 29</sup>. Endowing a BmoR-based biosensor with n-butanol specificity or  
257 isobutanol specificity is required to expand its application. In addition to the native sensing  
258 elements, some *de novo* designed biosensors that assemble specific protein functional  
259 domains were also developed <sup>30</sup>. Based on the analysis of BmoR in this work, the specific  
260 domains of BmoR might be served as crucial units for establishing novel biosensors to  
261 detect other vital compounds.  
262

263 **Conclusions**

264 The non-ideal properties of wild-type BmoR limit its applications for the screening of  
265 single-higher-alcohol industrial-producing strains or the detection of byproducts in the  
266 fermentation process. In this study, we engineered a significant region of BmoR and  
267 acquired two n-butanol-specific mutants, two isobutanol-specific mutants, and two  
268 ultrasensitive mutants. In addition, a mutant with a wider detection range (0–200 mM) was  
269 screened out, which could also be reflected in the isobutanol-producing strain. Notably, we  
270 observed that the signal-molecule-specific mutants display insensitivity towards ethanol,  
271 indicating that these specific mutants could be used to detect the production of byproducts  
272 (butanols) in the ethanol fermentation industry. In summary, this work supplied various  
273 desirable BmoR mutants that could be employed for constructing biosensors to screen ideal  
274 strains or establish dynamic control systems in the field of metabolic engineering.

275

## 276 **Methods**

### 277 **Strains, media, and materials**

278 *E. coli* XL10-Gold was used for plasmid construction, screening, and construction of the  
279 BmoR N-terminal-based random mutagenesis library. LB medium (10 g/L tryptone, 5 g/L  
280 yeast extract, and 10 g/L NaCl) was used for strain incubation and library screening. M9  
281 medium (6 g/L Na<sub>2</sub>HPO<sub>4</sub>, 3 g/L KH<sub>2</sub>PO<sub>4</sub>, 1 g/L NH<sub>4</sub>Cl, and 0.5 g/L NaCl, 1 mM MgSO<sub>4</sub>,  
282 0.1 mM CaCl<sub>2</sub>, 10 mg/L VB1, 4 g/L yeast extract, and 40 g/L glucose) was used for the  
283 fermentation experiment. Plasmids pSA65, pSA69, pYH1, and pYH10 were obtained from  
284 our previous study<sup>16,24</sup>. The details of the strains and plasmids used in this study are listed  
285 in Table S1.

286

### 287 **Homology modeling and molecular docking of BmoR mutants with signal molecules**

288 AUTODOCK and Chimera 1.14 were used for homology modeling and molecular docking  
289 of BmoR with signal molecules (n-butanol, isobutanol, ethanol, or glycol). The tertiary  
290 structure of wild-type BmoR, which was modeled in our previous study<sup>24</sup>, was used as a  
291 template to simulate and dock BmoR mutants with signal molecules. All BmoR mutant  
292 models were evaluated by PROCHECK, and all models have satisfactory quality, with over  
293 80% of the residues in the most favored region of the calculated z-scores. A grid box (10 ×  
294 17 × 8) encompassing the binding pocket of BmoR was set as the search space to explore  
295 suitable substrate-binding regions. The interactions between the mutants and signal  
296 molecules were analyzed and are shown in the corresponding figures.



297 **Establishment of the BmoR N-terminal-based mutagenesis library**

298 Error-prone PCR was carried out on the N-terminus of BmoR to generate an N-terminal-  
299 based mutagenesis library. The details of the error-prone PCR method are provided in the  
300 Supplementary Material. To carry out site-directed mutagenesis of *bmoR*, a pair of primers,  
301 including the desired mutations, was synthesized  
302 and used to amplify a linearized fragment from pYH1. The PCR products were purified  
303 and digested with DpnI and then transferred into *E. coli* XL10-Gold. The primers used in  
304 this study are listed in Table S2.

305

306 **High-throughput screening of the mutagenesis library**

307 Single colonies harboring plasmid pYH1 containing wild-type or mutated BmoR were pre-  
308 inoculated into 5 mL LB with 100 µg/mL ampicillin and then cultured at 37 °C overnight.  
309 Next, 50 µL of the seed culture was transferred into 950 µL LB, which was supplemented  
310 with appropriate antibiotics and 10 mM n-butanol or isobutanol in 96-deep-well plates. The  
311 cultures were then left at 30 °C for 16 h. To measure the apparent  $K_m$  values of the special  
312 BmoR mutants towards the butanols or ethanol, the butanol concentrations in 96-deep-well  
313 plates ranged between 0–100 mM, and the ethanol concentrations in 96-deep-well plates  
314 ranged between 0–800 mM. A microplate reader (BioTek Cytation 3) was used to detect  
315 the OD<sub>600</sub> values and GFP fluorescence. The excitation and emission wavelengths were set  
316 at 470 nm and 510 nm, respectively. The *bmoR* in the colonies that have distinct GFP/OD<sub>600</sub>  
317 values compared to the wild type were sequenced. Apparent  $K_m$  values were estimated

318 using Origin8.5 through non-linear regression of the Michaelis-Menten equation. The  
319 entire screening process is illustrated in Fig. S7. The ratio of n-butanol to isobutanol in a  
320 mixture of butanol in the culture is described in the Supplementary Material.

321

### 322 **Fermentation verification of BmoR with a wider detection range**

323 Plasmids pYH10 containing wild-type *bmoR* and pYH10-T12N containing *T12N* were  
324 individually introduced into strain TW (JCL260 with pSA65, which contained genes *kivd*  
325 and *adhA*, and pSA69, which contained genes *alsS*, *ilvC*, and *ilvD*), resulting in strains  
326 TW1 and TW2, respectively. For the fermentation experiment, the single colonies were  
327 pre-inoculated into 5 mL LB medium with associated antibiotics at 37 °C for 12–14 h. Then,  
328 200 µL of culture was inoculated into 20 mL M9 with 0.1 mM IPTG in a 250 mL screw  
329 cap conical flask and left at 30 °C in a shaker at 220 rpm. After 36 h, 40 g/L glucose was  
330 added to the culture. Samples were taken every 12 h for GFP/OD<sub>600</sub> measurements and  
331 isobutanol detection. GC analysis of the samples was performed as described in our  
332 previous study<sup>31</sup>.

333

334 **AUTHOR INFORMATION**

335 **Corresponding Author**

336 **Yi-Xin Huo** – *Key Laboratory of Molecular Medicine and Biotherapy, School of Life*  
337 *Science, Beijing Institute of Technology, Beijing 100081, P. R. China; Tobacco*  
338 *Research Institute, Chinese Academy of Agricultural Sciences, Qingdao 266101, P. R.*  
339 *China; Phone: 86-10-68918158;*

340 Email: [huoyixin@bit.edu.cn](mailto:huoyixin@bit.edu.cn)

341 **Authors**

342 **Tong Wu** – *Key Laboratory of Molecular Medicine and Biotherapy, School of Life*  
343 *Science, Beijing Institute of Technology, Beijing 100081, P. R. China;*

344 **Zhenya Chen** – *Key Laboratory of Molecular Medicine and Biotherapy, School of Life*  
345 *Science, Beijing Institute of Technology, Beijing 100081, P. R. China;*

346 **Cuiying Zhang** – *Key Laboratory of Industrial Fermentation Microbiology, Ministry of*  
347 *Education, Tianjin Industrial Microbiology Key Laboratory, College of Biotechnology,*  
348 *Tianjin University of Science and Technology, Tianjin 300457, P. R. China;*

349

350 **Author Contributions**

351 Y.-X.H. generated the idea. Y.-X.H., Z.C. and T.W. designed the project. T.W. and Z.C.  
352 carried out the experiments. T.W., Z.C., C.Z. and Y.-X.H. analyzed the data. T.W., Z.C. and  
353 Y.-X.H. wrote the manuscript.

354

355 **Author Contributions**

356 #T.W. and Z.C. contributed equally to this work.

357

358 **Notes**

359 The authors declare no competing financial interest.

360

361 **ACKNOWLEDGMENTS**

362 Research reported in this publication was supported by the National Key R&D Program of

363 China (grant no. 2019YFA0904104), National Natural Science Foundation of China (grant

364 nos.21908007 and 32000059), the Science and Technology Innovation Program of Chinese

365 Academy of Agricultural Sciences (ASTIP TRIC05), and the Fundamental Research Funds

366 for the Central Universities.

367

## 368     **References**

- 369     (1) Hossain, G. S.,Saini, M.,Miyake, R.,Ling, H.,Chang, M. W., (2020) Genetic Biosensor Design for  
370     Natural Product Biosynthesis in Microorganisms. *Trends Biotechnol.* 38 (7).
- 371     (2) Wan, X.,Volpetti, F.,Petrova, E.,French, C.,Maerkl, S. J.,Wang, B., (2019) Cascaded amplifying circuits  
372     enable ultrasensitive cellular sensors for toxic metals. *Nat. Chem. Biol.* 15 (5), 540-548.
- 373     (3) Zhang, F.,Carothers, J. M.,Keasling, J. D., (2012) Design of a dynamic sensor-regulator system for  
374     production of chemicals and fuels derived from fatty acids. *Nat. Biotechnol.* 30 (4), 354-359.
- 375     (4) Gao, C.,Hou, J.,Xu, P.,Guo, L.,Chen, X.,Hu, G.,Ye, C.,Edwards, H.,Chen, J.,Chen, W., (2019)  
376     Programmable biomolecular switches for rewiring flux in *Escherichia coli*. *Nat. Commun.* 10 (1), 1-12.
- 377     (5) Xiong, D.,Lu, S.,Wu, J.,Liang, C.,Wang, W.,Wang, W.,Jin, J.-M.,Tang, S.-Y., (2017) Improving key  
378     enzyme activity in phenylpropanoid pathway with a designed biosensor. *Metab. Eng.* 40, 115-123.
- 379     (6) Liu, Y.,Zhuang, Y.,Ding, D.,Xu, Y.,Sun, J.,Zhang, D., (2017) Biosensor-based evolution and elucidation  
380     of a biosynthetic pathway in *Escherichia coli*. *ACS Synth Biol.* 6 (5), 837-848.
- 381     (7) Yu, H.,Wang, N.,Huo, W.,Zhang, Y.,Zhang, W.,Yang, Y.,Chen, Z.,Huo, Y. X., (2019) Establishment of  
382     BmoR-based biosensor to screen isobutanol overproducer. *Microb. Cell Fact.* 18 (1), 30.
- 383     (8) Koch, M.,Pandi, A.,Borkowski, O.,Batista, A. C.,Faulon, J. L., (2019) Custom-made transcriptional  
384     biosensors for metabolic engineering. *Curr. Opin. Biotechnol.* 59, 78-84.
- 385     (9) Liu, D.,Evans, T.,Zhang, F., (2015) Applications and advances of metabolite biosensors for metabolic  
386     engineering. *Metab. Eng.* 31, 35-43.
- 387     (10) Dietrich, J. A.,Shis, D. L.,Alikhani, A.,Keasling, J. D., (2013) Transcription factor-based screens and  
388     synthetic selections for microbial small-molecule biosynthesis. *ACS Synth Biol.* 2 (1), 47-58.
- 389     (11) Boada, Y.,Vignoni, A.,Picó, J.,Carbonell, P., (2020) Extended Metabolic Biosensor Design for Dynamic  
390     Pathway Regulation of Cell Factories. *iScience* 23 (7), 101305.
- 391     (12) Connor, M. R.,Liao, J. C., (2009) Microbial production of advanced transportation fuels in non-natural  
392     hosts. *Curr. Opin. Biotechnol.* 20 (3), 307-315.
- 393     (13) Mascal, M., (2012) Chemicals from biobutanol: technologies and markets. *Biofuel Bioprod Bior.* 6 (4),  
394     483-493.
- 395     (14) Jin, C.,Yao, M.,Liu, H.,Chia-fon, F. L.,Ji, J., (2011) Progress in the production and application of n-  
396     butanol as a biofuel. *Renew Sust Energ Rev.* 15 (8), 4080-4106.
- 397     (15) Atsumi, S.,Cann, A. F.,Connor, M. R.,Shen, C. R.,Smith, K. M.,Brynildsen, M. P.,Chou, K. J.,Hanai,  
398     T.,Liao, J. C., (2008) Metabolic engineering of *Escherichia coli* for 1-butanol production. *Metab. Eng.* 10  
399     (6), 305-311.
- 400     (16) Atsumi, S.,Hanai, T.,Liao, J. C., (2008) Non-fermentative pathways for synthesis of branched-chain  
401     higher alcohols as biofuels. *Nature* 451 (7174), 86-89.
- 402     (17) Atsumi, S.,Wu, T.-Y.,Eckl, E.-M.,Hawkins, S. D.,Buelter, T.,Liao, J. C., (2010) Engineering the  
403     isobutanol biosynthetic pathway in *Escherichia coli* by comparison of three aldehyde reductase/alcohol  
404     dehydrogenase genes. *Appl. Microbiol. Biotechnol.* 85 (3), 651-657.
- 405     (18) Chen, X.,Nielsen, K. F.,Borodina, I.,Kielland-Brandt, M. C.,Karhumaa, K., (2011) Increased isobutanol  
406     production in *Saccharomyces cerevisiae* by overexpression of genes in valine metabolism. *Biotechnol.*  
407     *Biofuels* 4 (1), 1-12.
- 408     (19) Huo, Y.-X.,Cho, K. M.,Rivera, J. G. L.,Monte, E.,Shen, C. R.,Yan, Y.,Liao, J. C., (2011) Conversion of

- 409 proteins into biofuels by engineering nitrogen flux. *Nat. Biotechnol.* 29 (4), 346-351.
- 410 (20) Huo, Y.-X., Guo, L., Ma, X., (2018) Biofuel production with a stress-resistant and growth phase-  
411 independent promoter: mechanism revealed by in vitro transcription assays. *Appl. Microbiol. Biotechnol.* 102  
412 (6), 2929-2940.
- 413 (21) Li, S., Wen, J., Jia, X., (2011) Engineering *Bacillus subtilis* for isobutanol production by heterologous  
414 Ehrlich pathway construction and the biosynthetic 2-ketoisovalerate precursor pathway overexpression. *Appl.*  
415 *Microbiol. Biotechnol.* 91 (3), 577-589.
- 416 (22) Smith, K. M., Cho, K.-M., Liao, J. C., (2010) Engineering *Corynebacterium glutamicum* for isobutanol  
417 production. *Appl. Microbiol. Biotechnol.* 87 (3), 1045-1055.
- 418 (23) Kurth, E. G., Doughty, D. M., Bottomley, P. J., Arp, D. J., Sayavedra-Soto, L. A., (2008) Involvement of  
419 BmoR and BmoG in n-alkane metabolism in '*Pseudomonas butanovora*'. *Microbiology* 154 (1), 139-147.
- 420 (24) Yu, H., Chen, Z., Wang, N., Yu, S., Yan, Y., Huo, Y.-X., (2019) Engineering transcription factor BmoR for  
421 screening butanol overproducers. *Metab. Eng.* 56, 28-38.
- 422 (25) Wikström, P., O'Neill, E., Ng, L. C., Shingler, V., (2001) The regulatory N-terminal region of the  
423 aromatic-responsive transcriptional activator DmpR constrains nucleotide-triggered multimerisation. *J. Mol.*  
424 *Biol.* 314 (5), 971-984.
- 425 (26) Xu, H., Gu, B., Nixon, B. T., Hoover, T. R., (2004) Purification and characterization of the AAA+ domain  
426 of *Sinorhizobium meliloti* DctD, a  $\sigma^{54}$ -dependent transcriptional activator. *J. Bacteriol.* 186 (11), 3499-3507.
- 427 (27) De Carlo, S., Chen, B., Hoover, T. R., Kondrashkina, E., Nogales, E., Nixon, B. T., (2006) The structural  
428 basis for regulated assembly and function of the transcriptional activator NtrC. *Genes Dev.* 20 (11), 1485-  
429 1495.
- 430 (28) Sun, X., Li, Q., Wang, Y., Zhou, W., Guo, Y., Chen, J., Zheng, P., Sun, J., Ma, Y., (2020) Isoleucyl-tRNA  
431 synthetase mutant based whole-cell biosensor for high-throughput selection of isoleucine overproducers.  
432 *Biosens. Bioelectron.* 172, 112783.
- 433 (29) Unger, E. K., Keller, J. P., Altermatt, M., Liang, R., Matsui, A., Dong, C., Hon, O. J., Yao, Z., Sun, J., Banala,  
434 S., Flanigan, M. E., Jaffe, D. A., Hartanto, S., Carlen, J., Mizuno, G. O., Borden, P. M., Shivange, A. V., Cameron,  
435 L. P., Sinning, S., Underhill, S. M., Olson, D. E., Amara, S. G., Temple Lang, D., Rudnick, G., Marvin, J. S., Lavis,  
436 L. D., Lester, H. A., Alvarez, V. A., Fisher, A. J., Prescher, J. A., Kash, T. L., Yarov-Yarovoy, V., Gradinaru,  
437 V., Looger, L. L., Tian, L., (2020) Directed Evolution of a Selective and Sensitive Serotonin Sensor via  
438 Machine Learning. *Cell* 183 (7), 1986-2002.e26.
- 439 (30) Quijano-Rubio, A., Yeh, H. W., Park, J., Lee, H., Langan, R. A., Boyken, S. E., Lajoie, M. J., Cao, L., Chow,  
440 C. M., Miranda, M. C., Wi, J., Hong, H. J., Stewart, L., Oh, B. H., Baker, D., (2020) De novo design of modular  
441 and tunable allosteric biosensors. *Nature*.
- 442 (31) Ma, L., Guo, L., Yang, Y., Guo, K., Yan, Y., Ma, X., Huo, Y.-X. J. B. f. b., (2020) Protein-based biorefining  
443 driven by nitrogen-responsive transcriptional machinery. *13* (1), 1-14.

444

445

446 **Figure legends**

447 **Fig. 1. The activation mechanism and simulated structure of wild-type BmoR.** (A) The  
448 simulation mechanism of wild-type BmoR. (B) The simulated structure and the binding  
449 pocket of wild-type BmoR. (C) The binding pocket and binding sites of wild-type BmoR  
450 with different signal molecules (isobutanol, n-butanol, ethanol or glycol).

451

452 **Fig. 2. Specific response of BmoR mutants towards n-butanol.** (A) The response values  
453 of BmoR mutants W21R/E54V and I183T/D273N towards 10 mM n-butanol or isobutanol.  
454 (B) The response curves of BmoR mutants towards n-butanol. (C) The response curves of  
455 BmoR mutants towards isobutanol. (D) Simulation and molecule docking of mutant  
456 W21R/E54V with n-butanol or isobutanol, and confirmation of the binding sites with signal  
457 molecules. (E) Simulation and molecule docking of mutant I183T/D273N with n-butanol  
458 or isobutanol, and confirmation of the binding sites with signal molecules. Values and error  
459 bars represent mean and s.d. (n = 3), respectively.

460

461 **Fig. 3. Specific response of BmoR mutants towards isobutanol.** (A) The response values  
462 of BmoR mutants M94V/F272L and S240P towards 10 mM n-butanol or isobutanol. (B)  
463 The response curves of BmoR mutants towards n-butanol. (C) The response curves of  
464 BmoR mutants towards isobutanol. (D) Simulation and molecule docking of mutant  
465 M94V/F272L with n-butanol or isobutanol, and confirmation of the binding sites with  
466 signal molecules. (E) Simulation molecule docking of mutant S240P with n-butanol or

467 isobutanol, and confirmation of the binding sites with signal molecules. Values and error  
468 bars represent mean and s.d. (n = 3), respectively.

469

470 **Fig. 4. Verification of the specificity via adding mixed signal molecules and BmoR**

471 **mutants with higher outputs and sensitivity. (A)** Maintaining the concentration (10 mM)

472 of one kind of butanols and increasing the concentration of the other kind of butanols with

473 a gradient (0-100 mM) to confirm the specificity of BmoR mutants W21R/E54V and

474 M94V/F272L. **(B)** The response values of BmoR mutants E54G and V311A towards 1 mM

475 n-butanol or isobutanol. **(C)** The response curves of BmoR mutants E54G and V311A

476 towards n-butanol. **(D)** The response curves of BmoR mutants E54G and V311A towards

477 isobutanol. Values and error bars represent mean and s.d. (n = 3), respectively.

478

479 **Fig. 5. BmoR mutant with wider detection range or ethanol insensitivity. (A)** The

480 response curves of wild-type BmoR and mutant T12N towards n-butanol. **(B)** The response

481 curves of wild-type BmoR and mutant T12N towards isobutanol. **(C)** The response curves

482 of wild-type BmoR and mutant T12N towards isobutanol which was produced by the

483 isobutanol-producing strain. **(D)** The response values of wild-type BmoR and mutant T12N

484 towards 67 mM, 114 mM and 215 mM isobutanol. **(E)** The response values of specific

485 mutants via adding 0-800 mM ethanol in culture. **(F)** The response values of W21R/E54V

486 and M94V/F272L via adding 0-60 mM n-butanol or isobutanol and 500 mM ethanol as

487 noise. Values and error bars represent mean and s.d. (n = 3), respectively. \*P < 0.1, \*\*P <



488 0.01 as determined by two-tailed t-test.

489

490 **Table 1. Representative BmoR mutants with remarkable properties in this study**  
491

| <b>BmoR Mutant</b> | <b>Property</b>       |                        |                          |                    |                       |               |
|--------------------|-----------------------|------------------------|--------------------------|--------------------|-----------------------|---------------|
|                    | n-Butanol specificity | Isobutanol specificity | Insensitivity to ethanol | Higher sensitivity | Wider detection range | Higher output |
| W21R/E54V          | √                     |                        | √                        |                    |                       |               |
| I183T/D273N        | √                     |                        | √                        |                    |                       |               |
| M94V/F272L         |                       | √                      | √                        |                    |                       |               |
| S240P              |                       | √                      | √                        |                    |                       |               |
| E54G               |                       |                        |                          | √                  |                       | √             |
| V311A              |                       |                        |                          | √                  |                       | √             |
| T12N               |                       |                        |                          |                    | √                     |               |

492

493

494

A

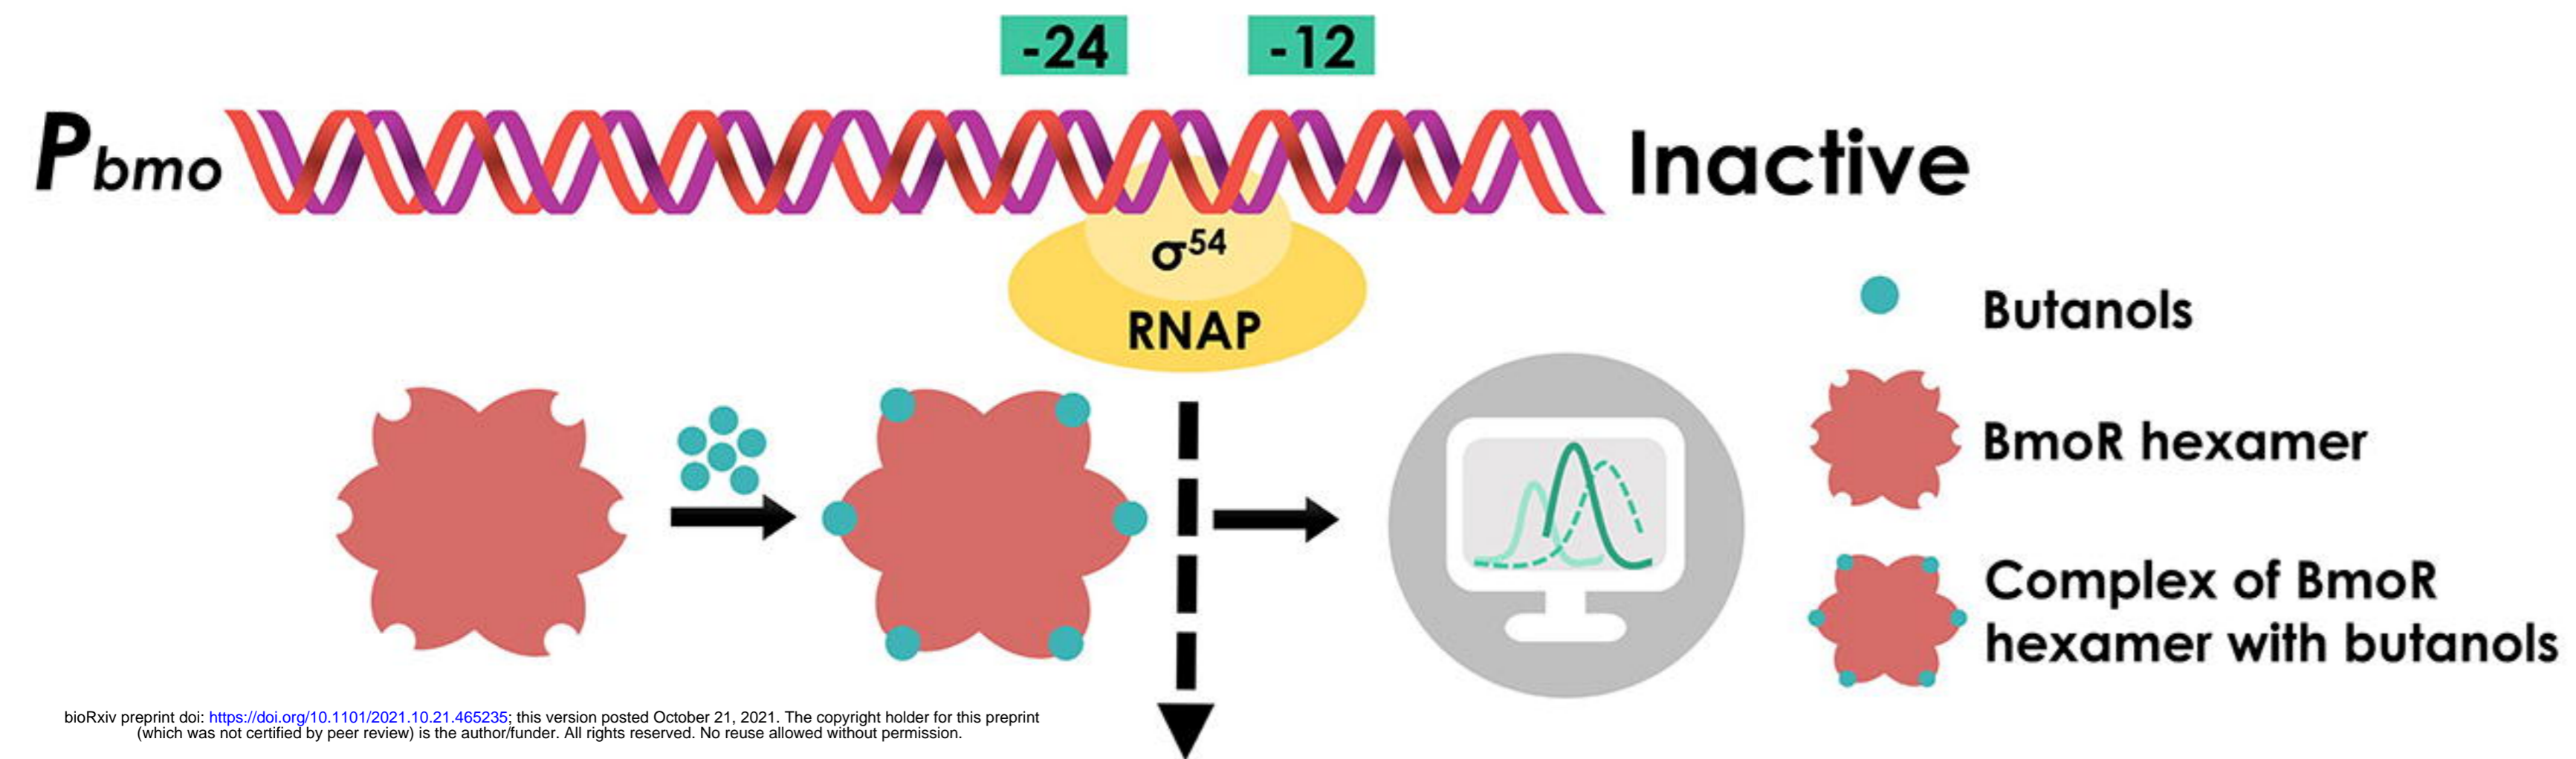

B

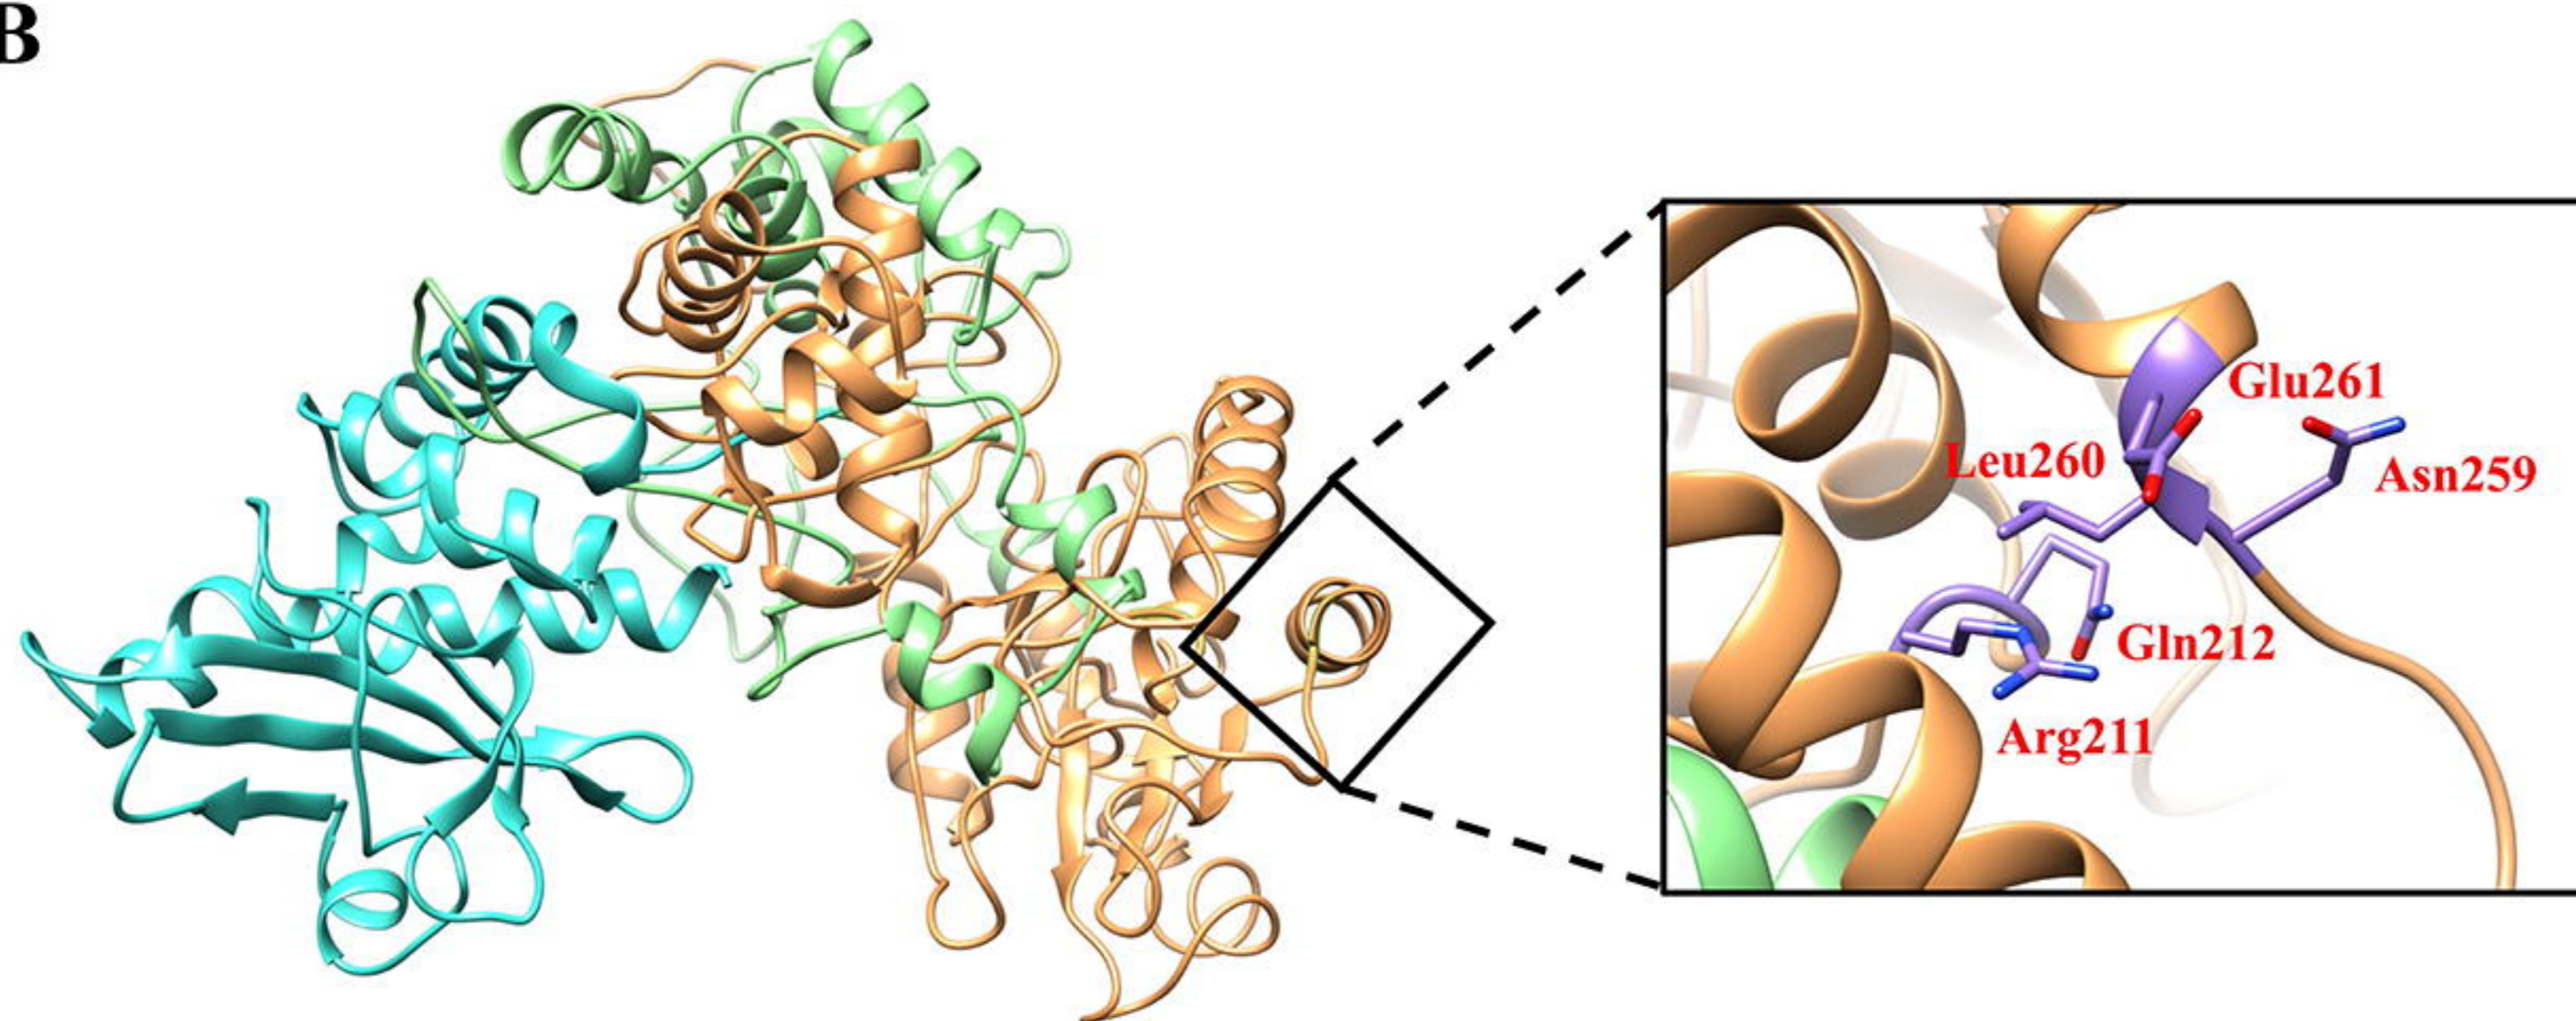

C

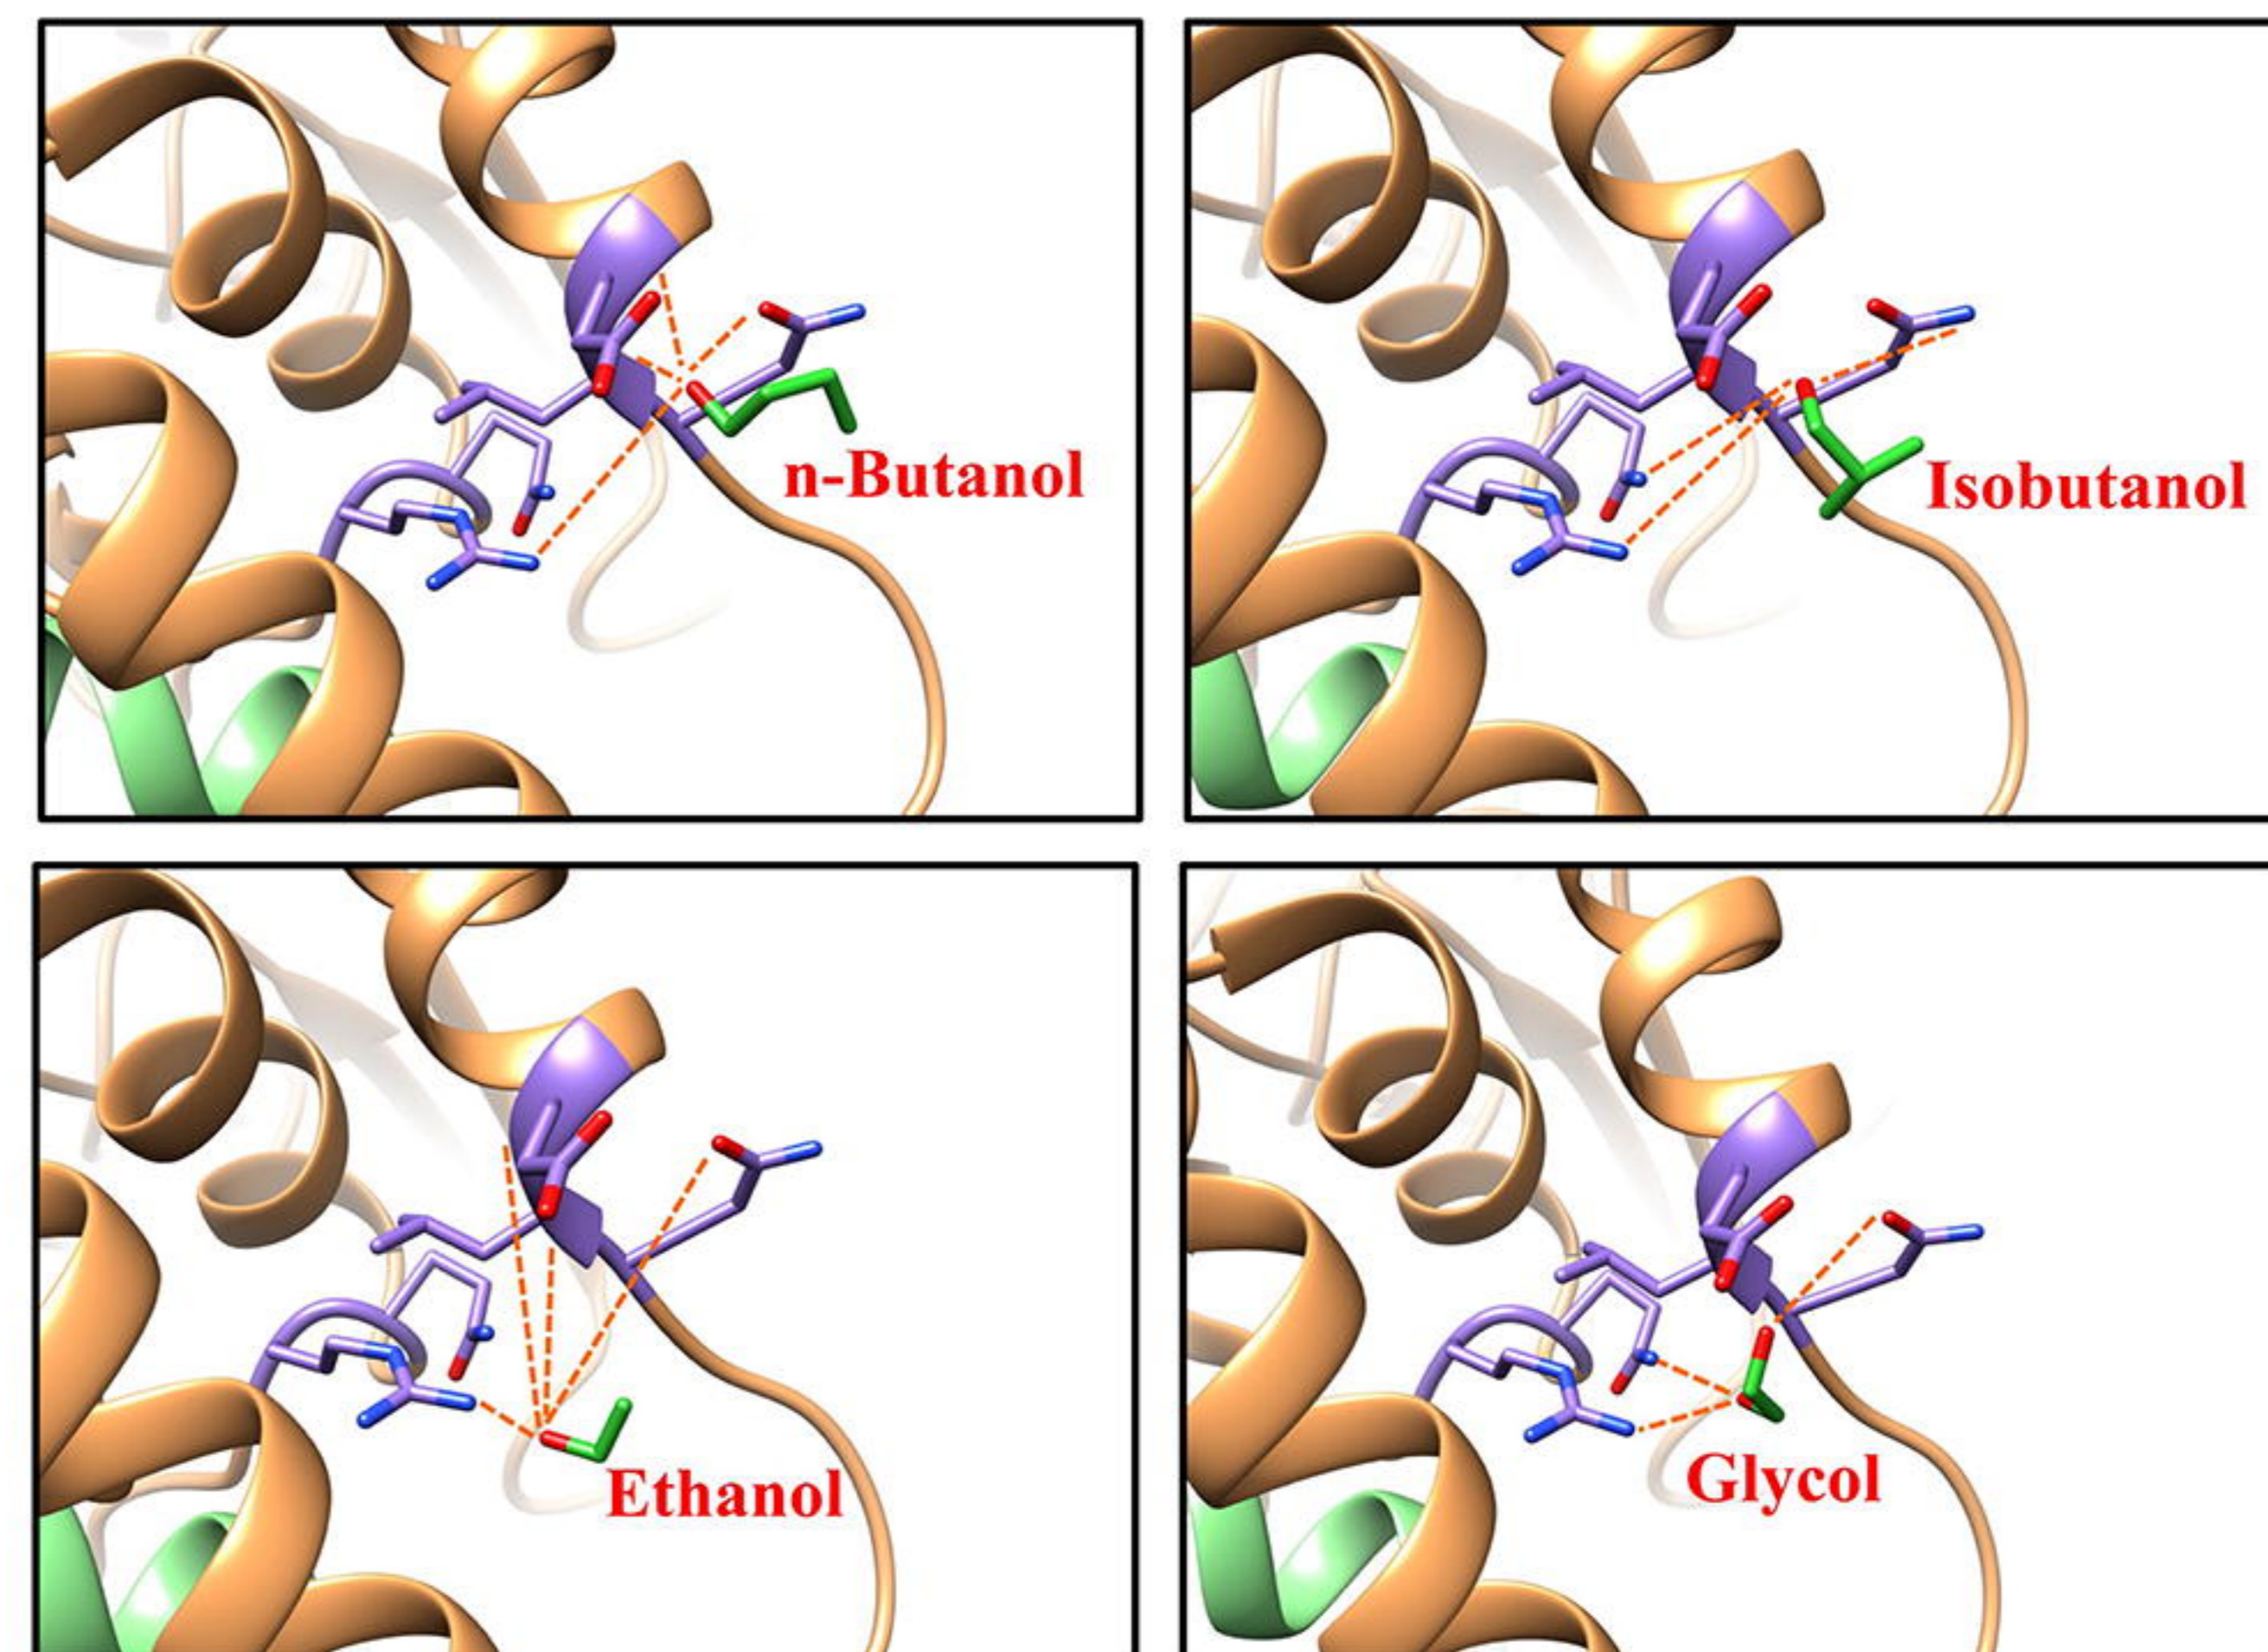

|                      | n-Butanol                                           | Isobutanol                    | Ethanol                                             | Glycol                        |
|----------------------|-----------------------------------------------------|-------------------------------|-----------------------------------------------------|-------------------------------|
| <b>Binding sites</b> | Arg 211<br>Gln 212<br>Asn 259<br>Leu 260<br>Glu 261 | Arg 211<br>Gln 212<br>Asn 259 | Arg 211<br>Gln 212<br>Asn 259<br>Leu 260<br>Glu 261 | Arg 211<br>Gln 212<br>Leu 260 |

**A**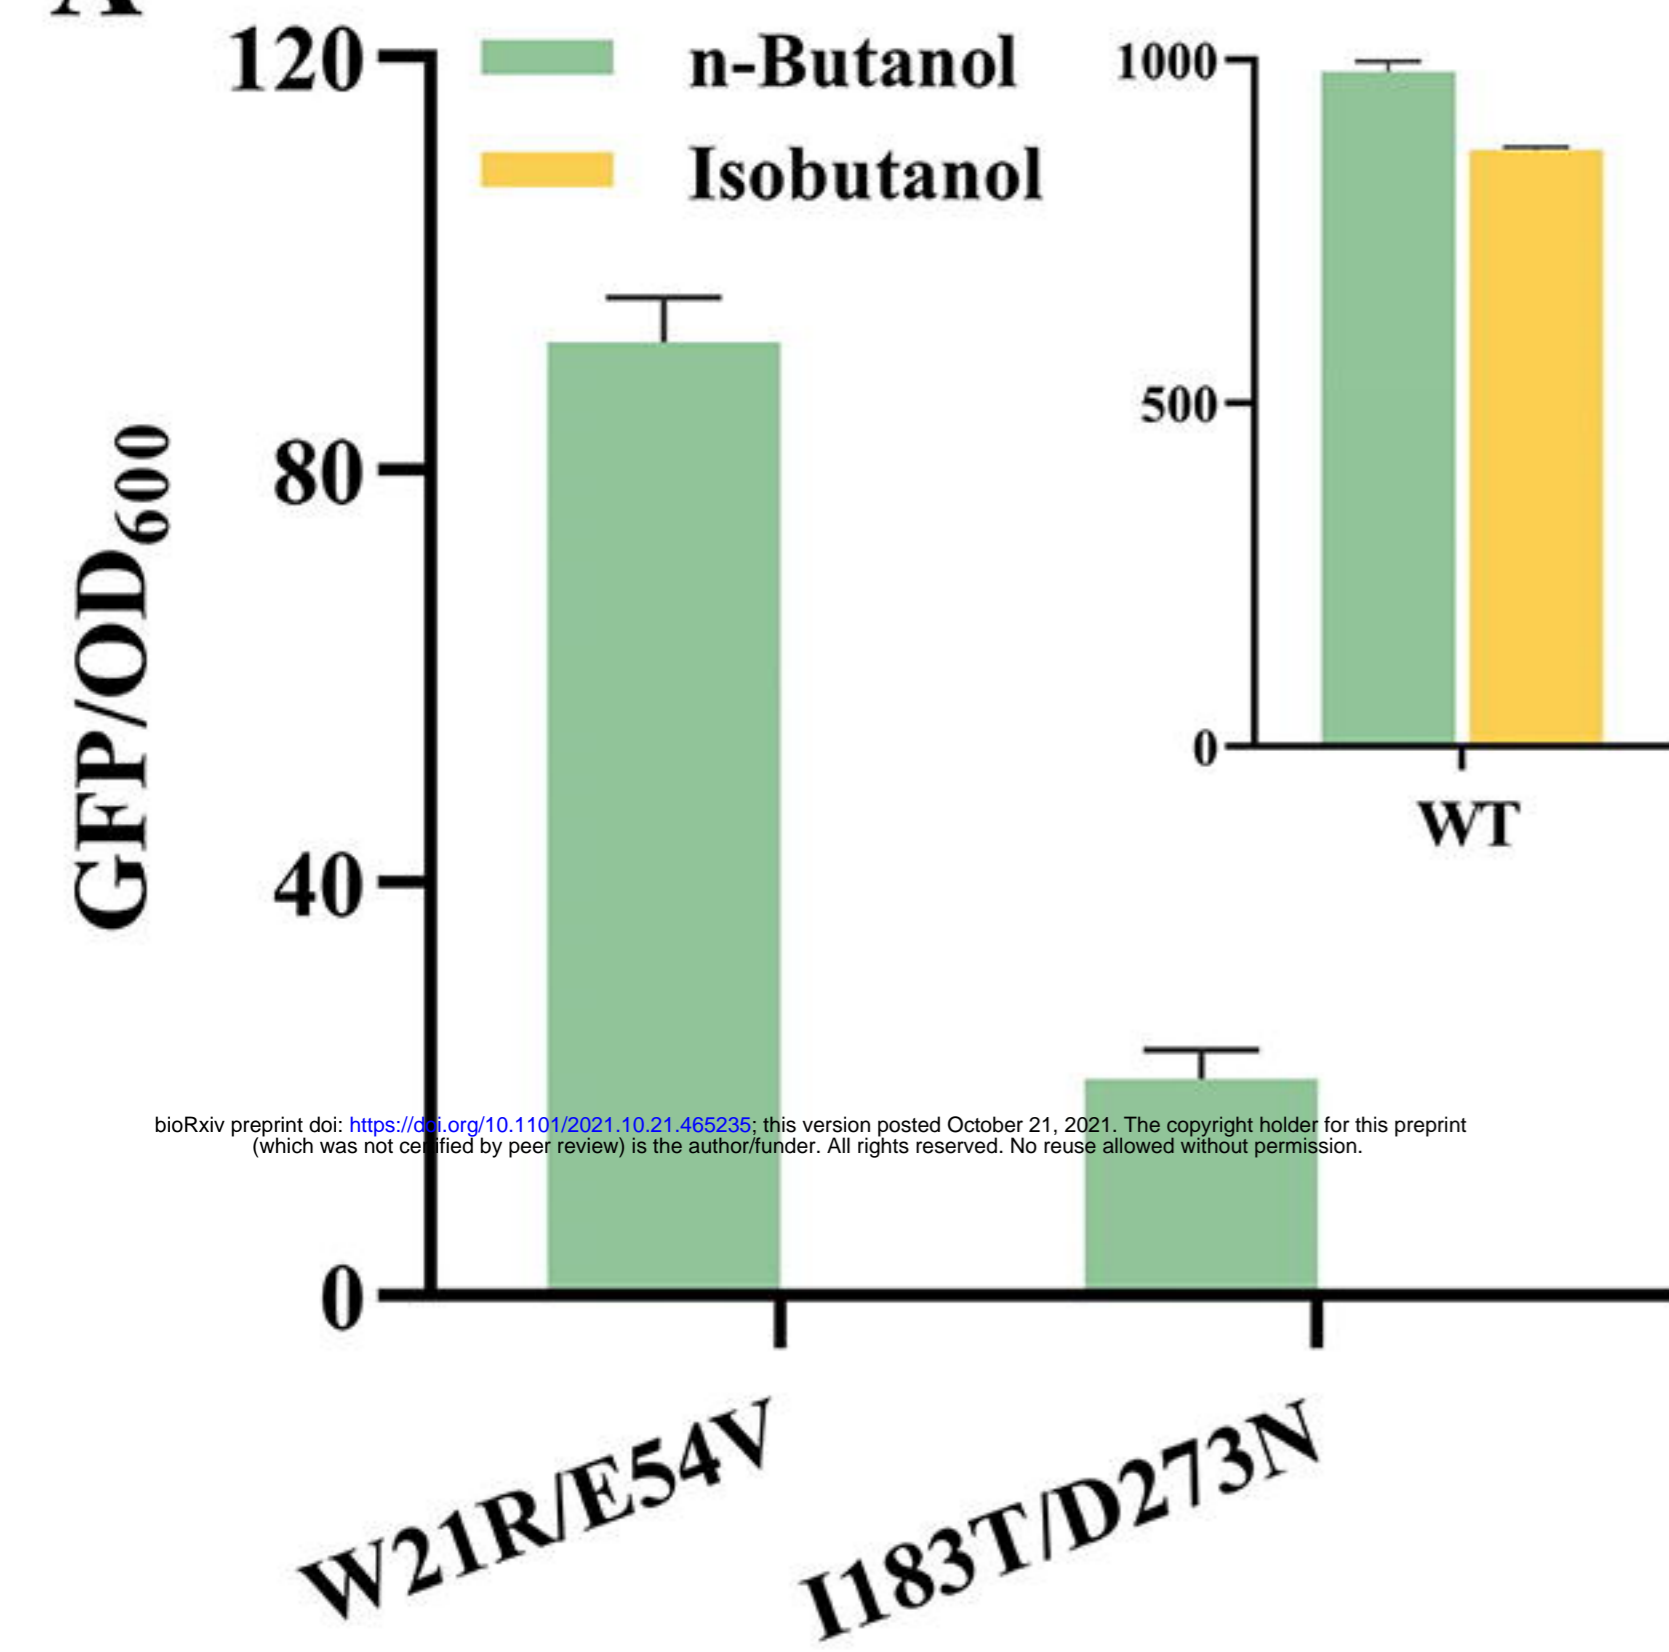**B**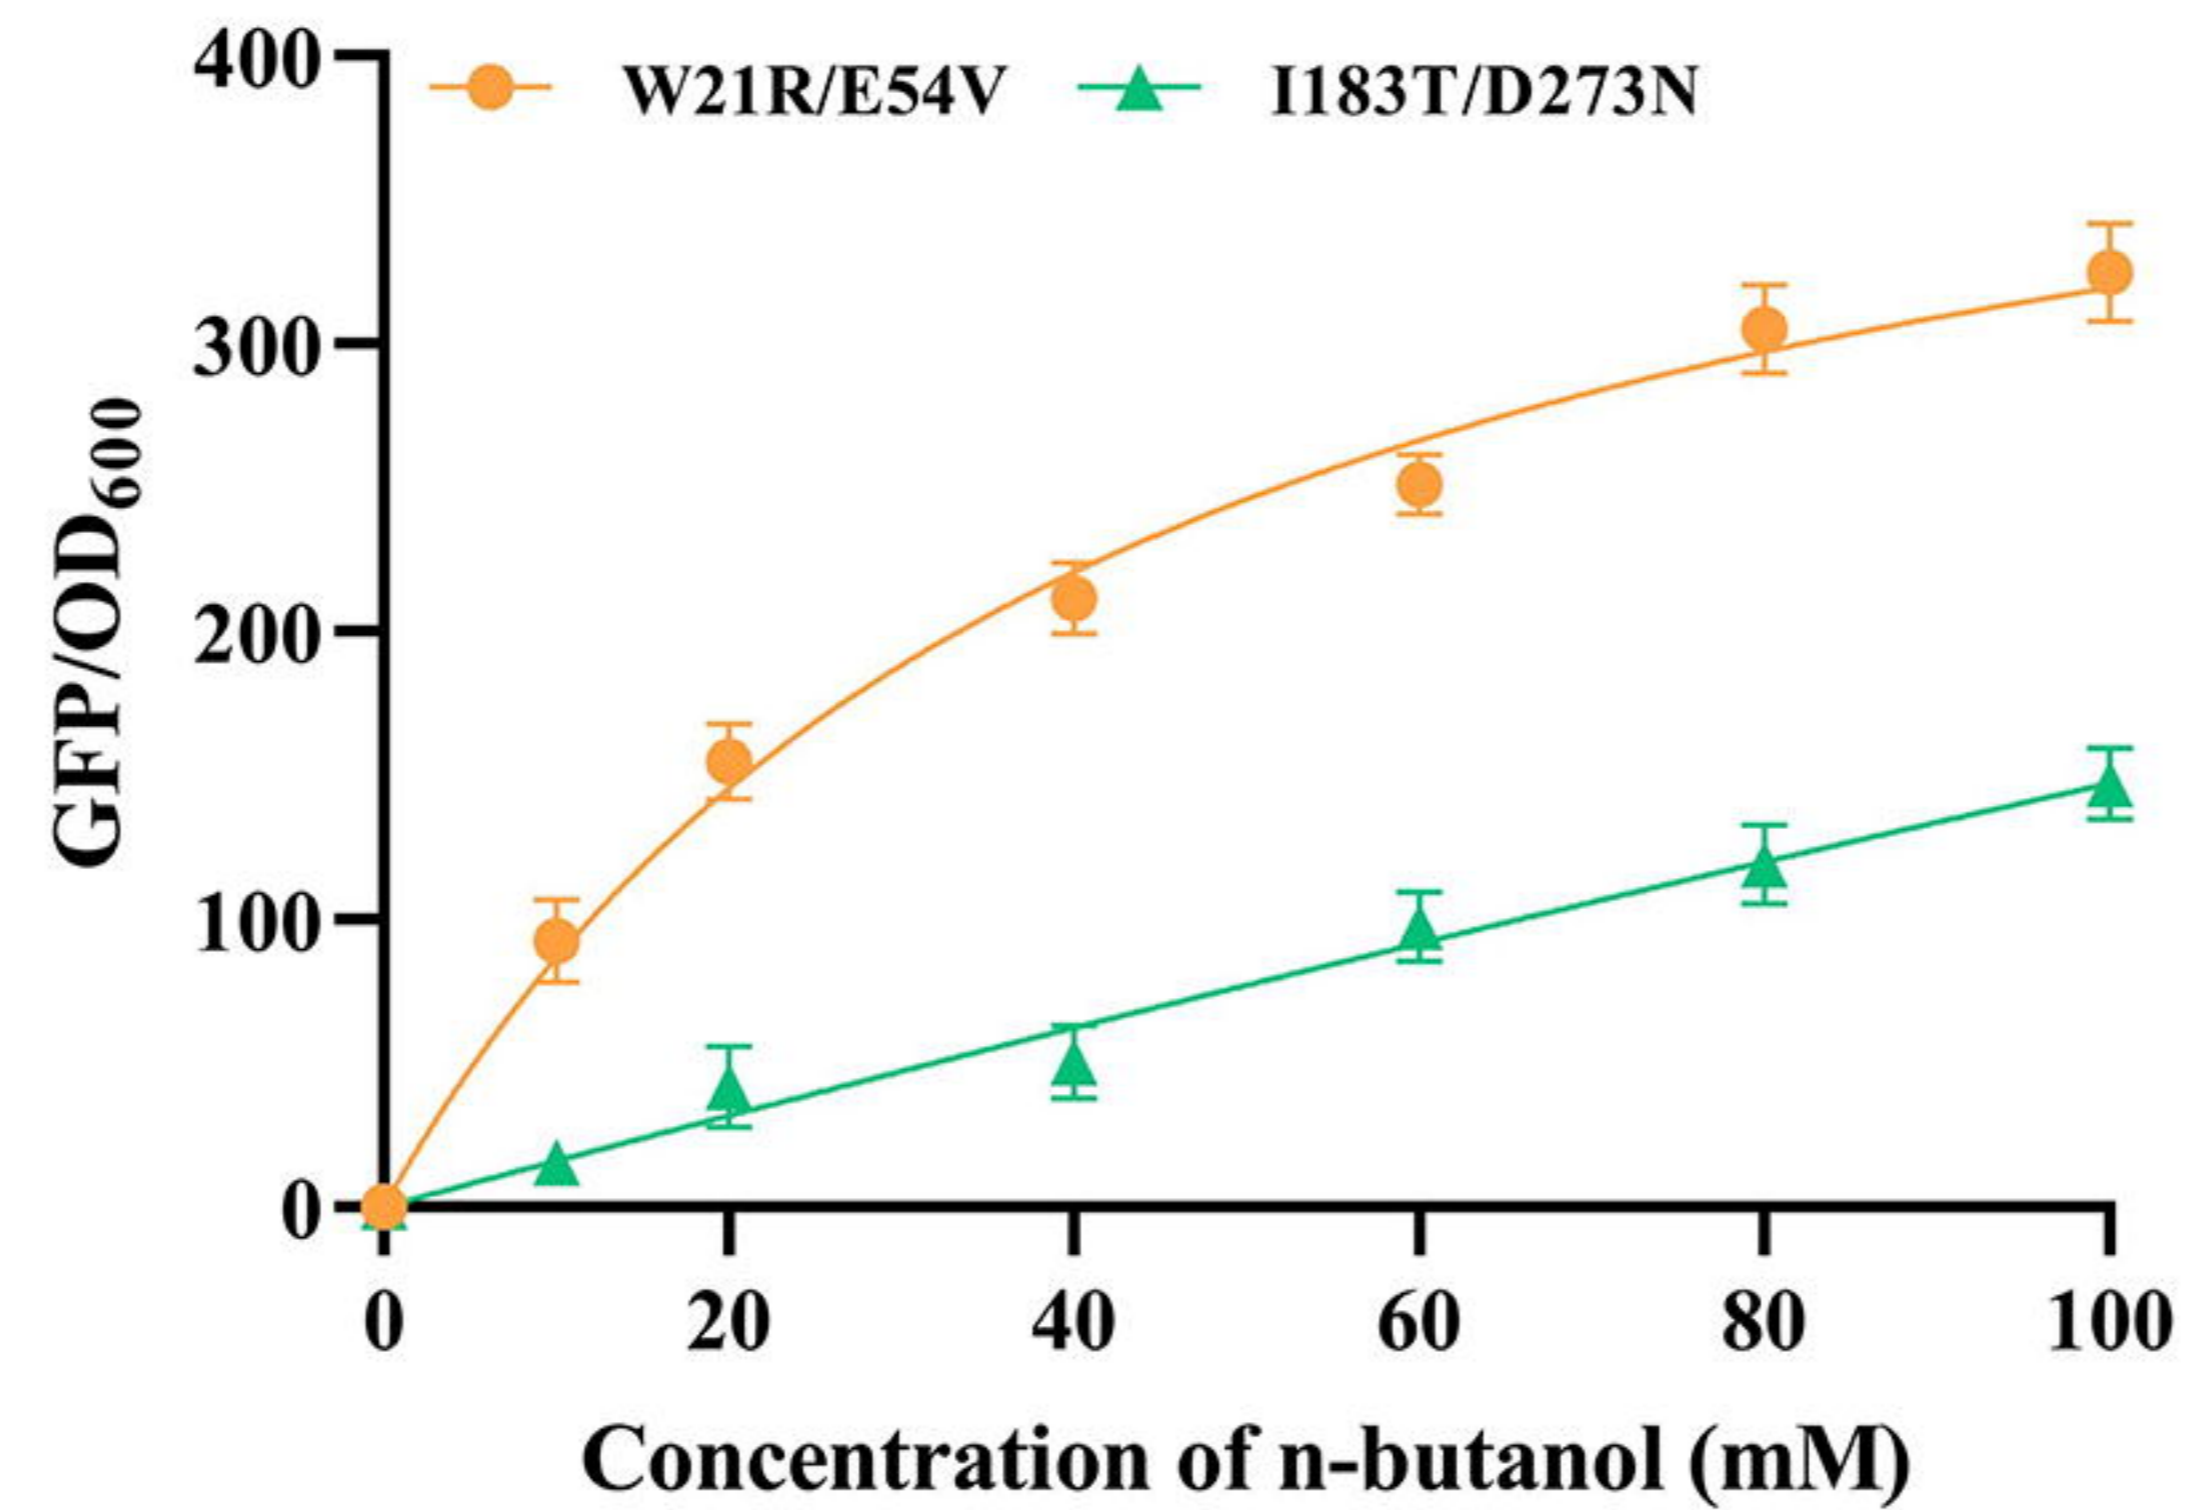**C**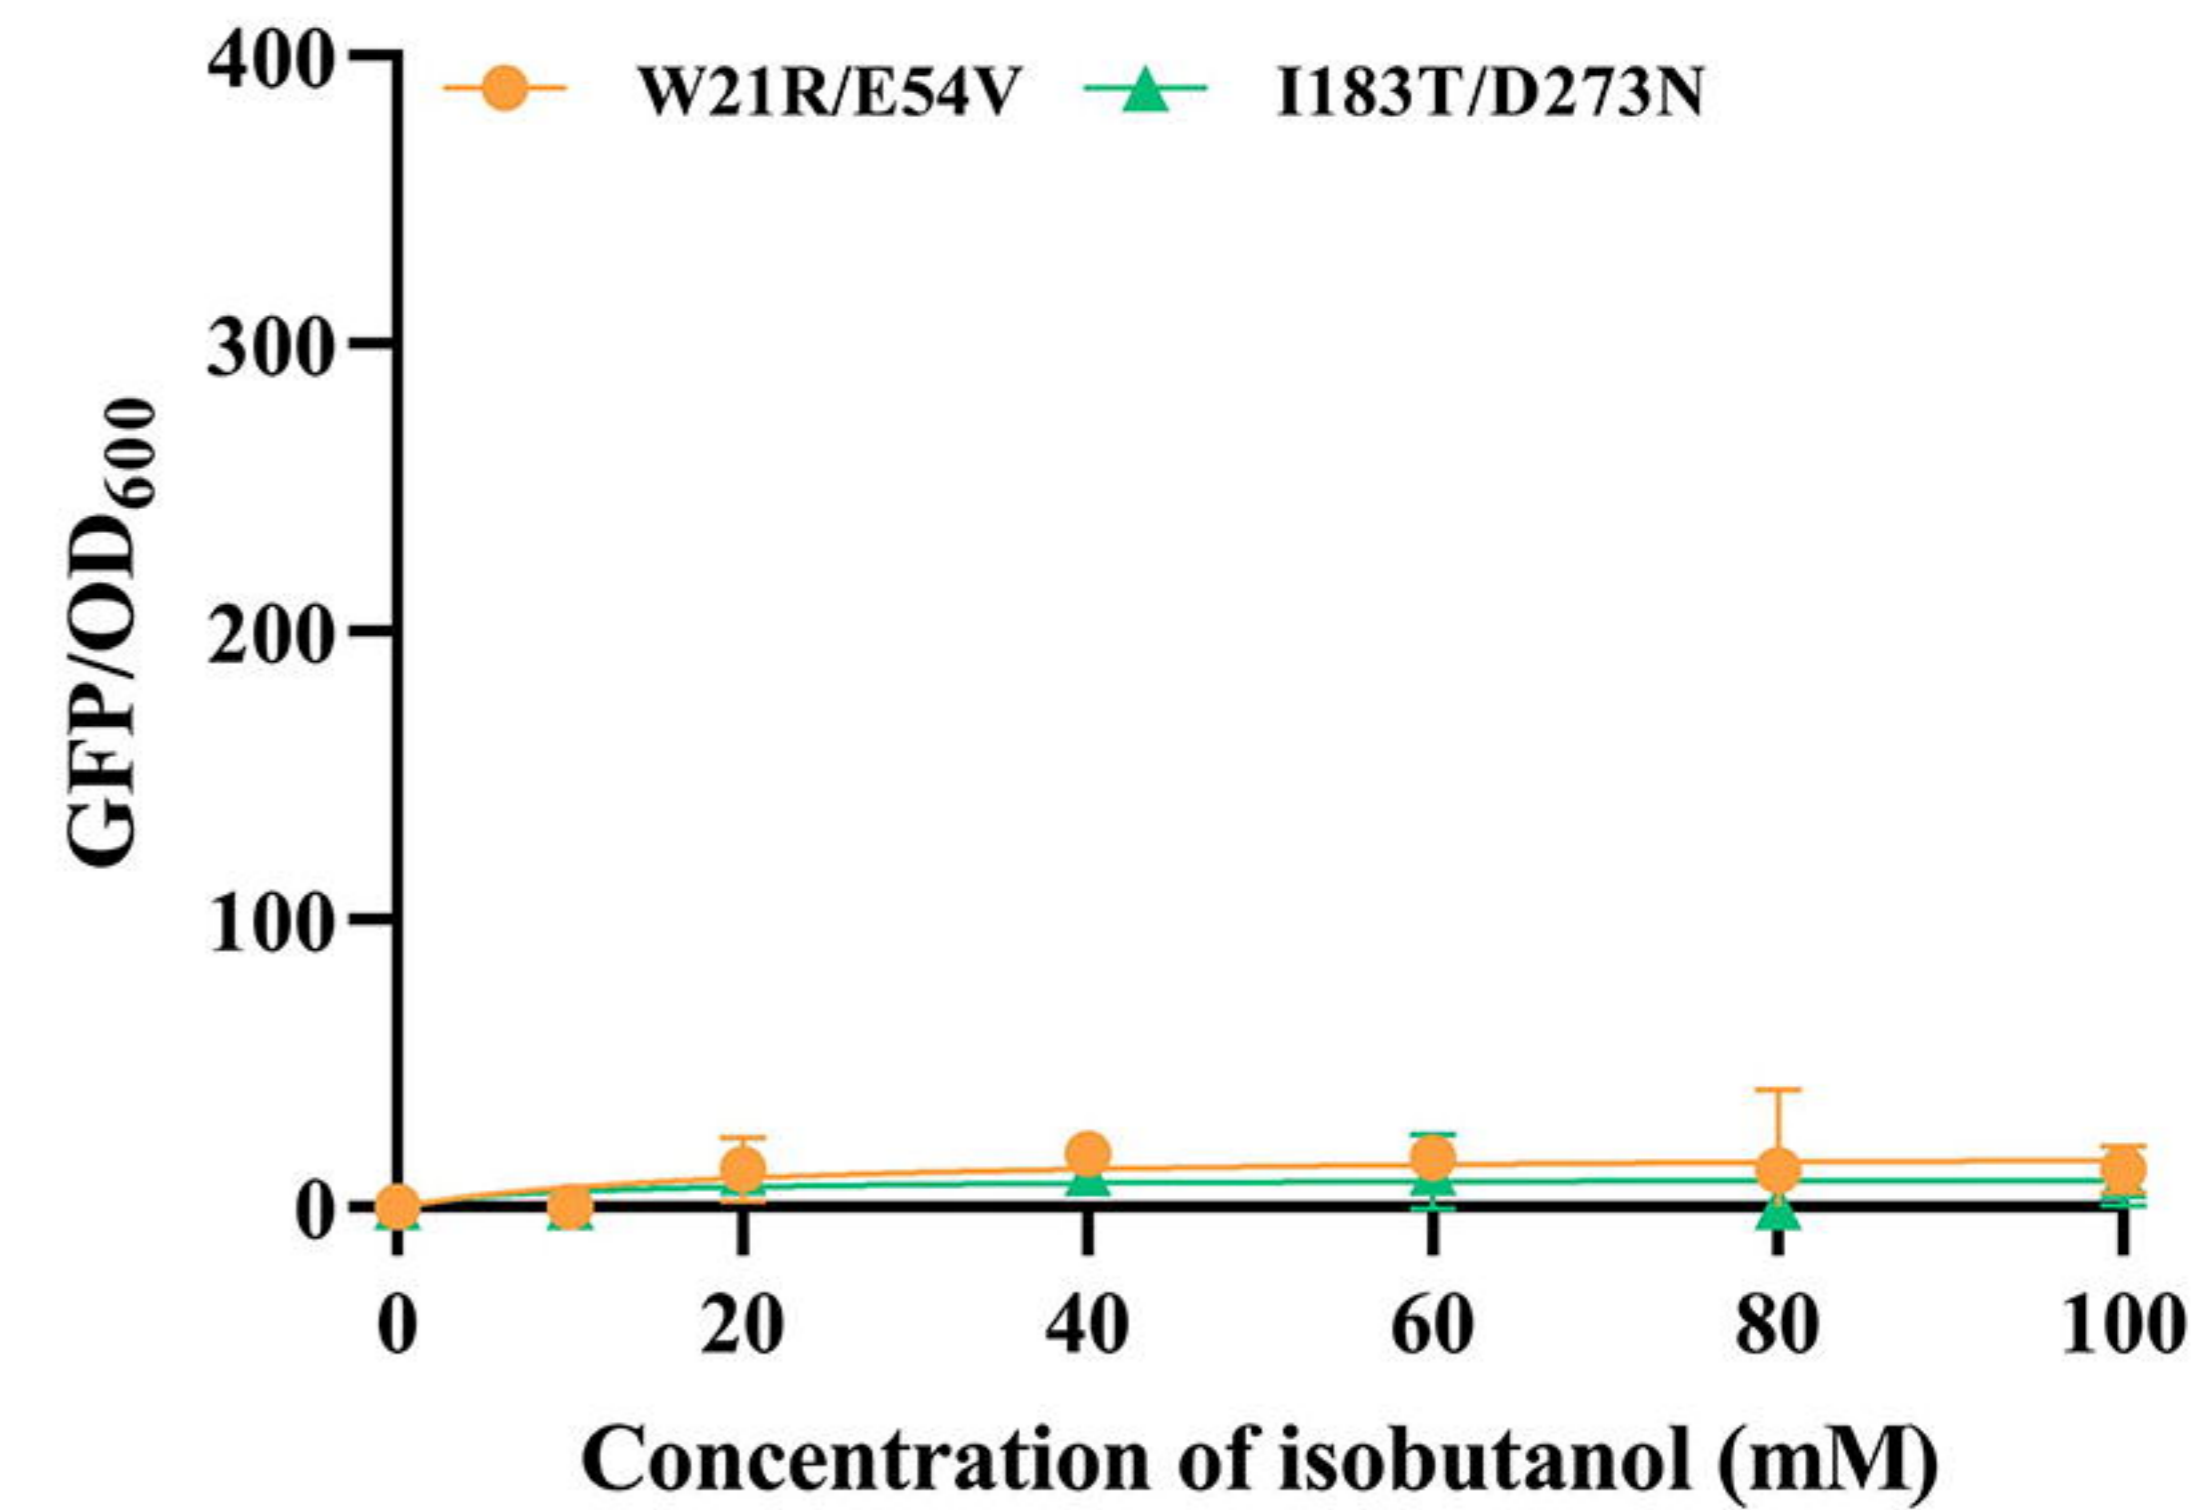**D**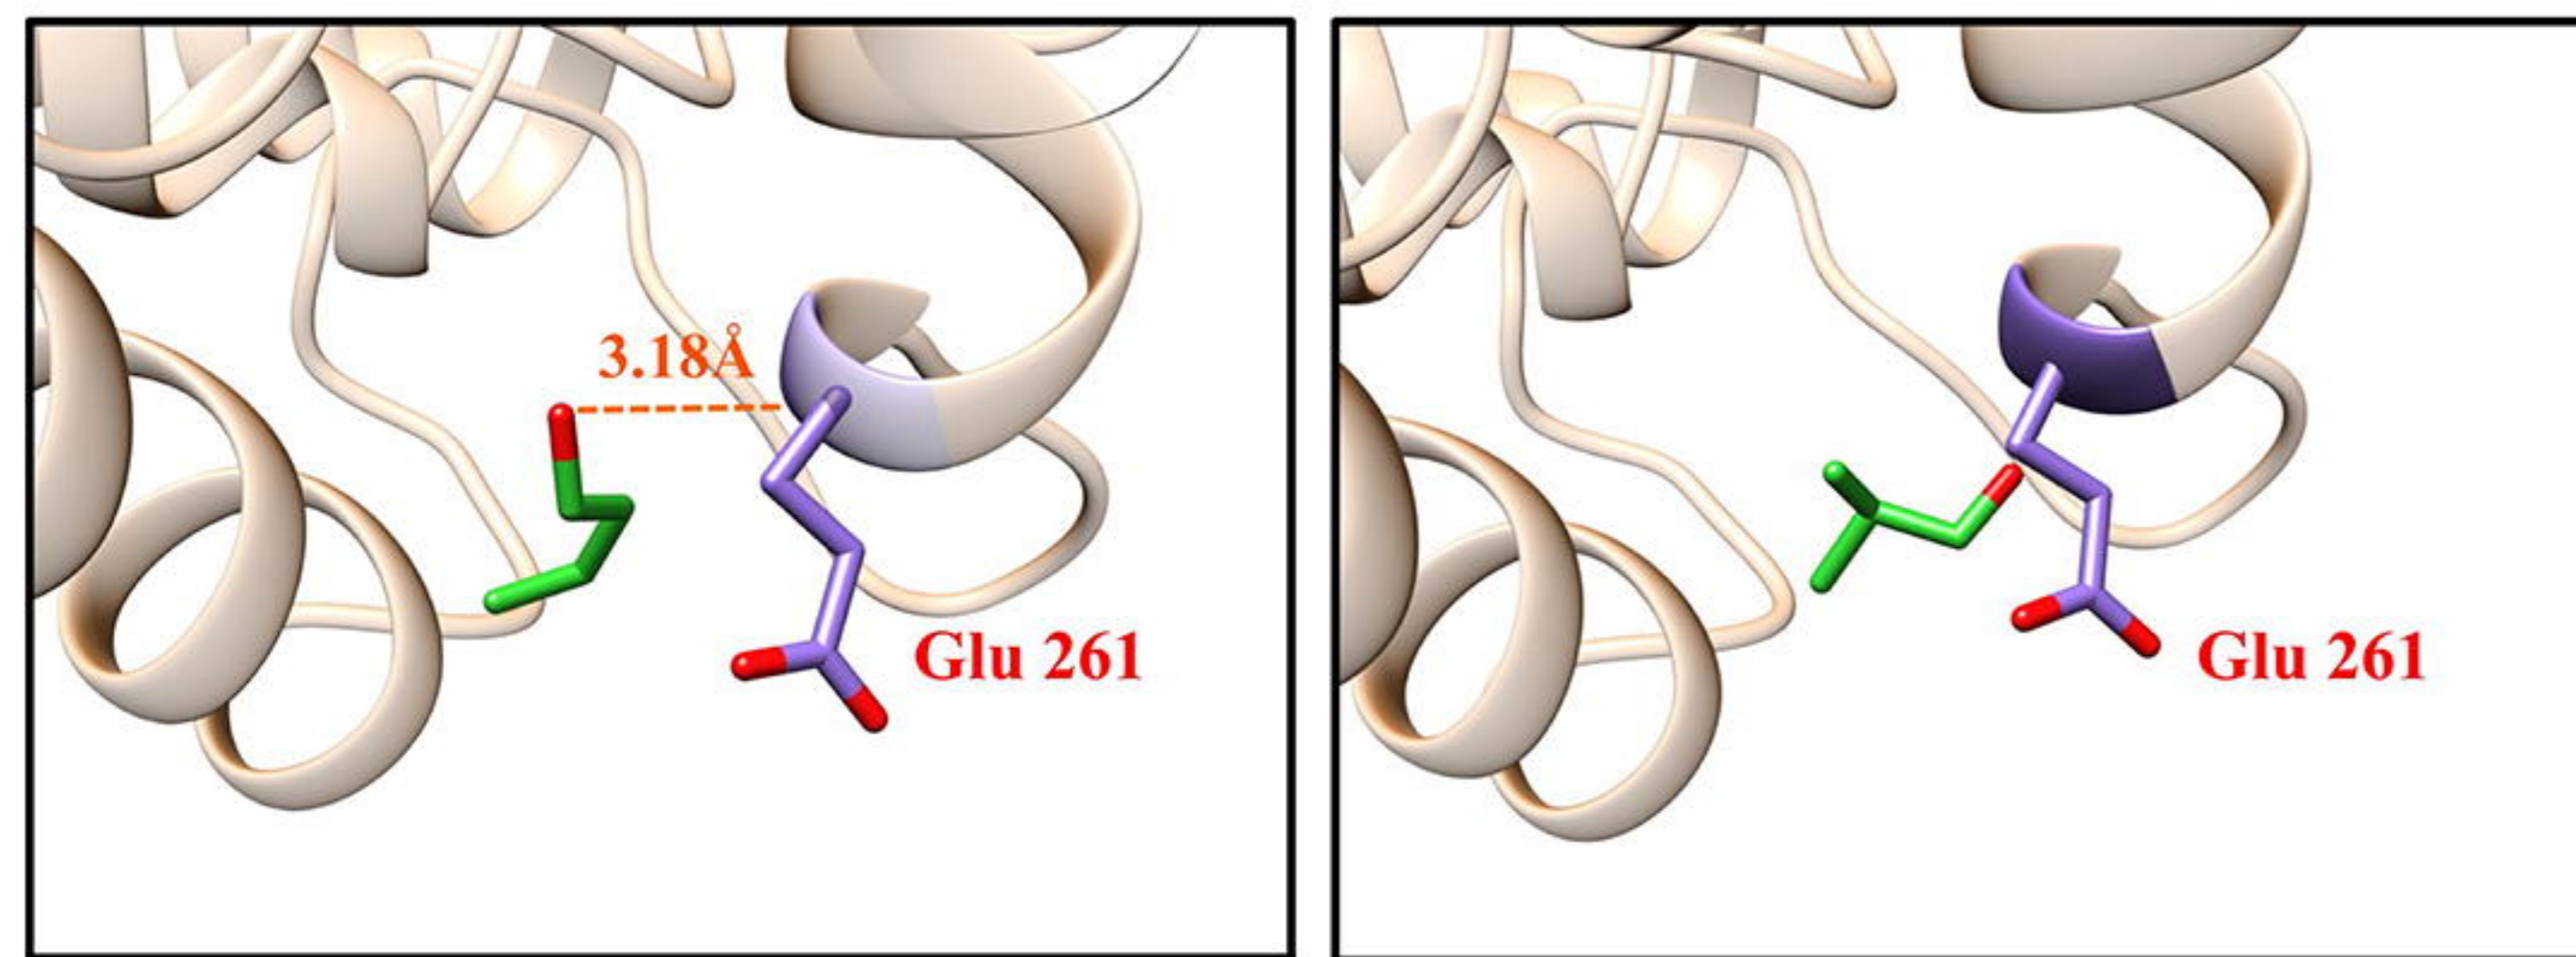

W21R/E54V with n-butanol

W21R/E54V with isobutanol

No interaction

**E**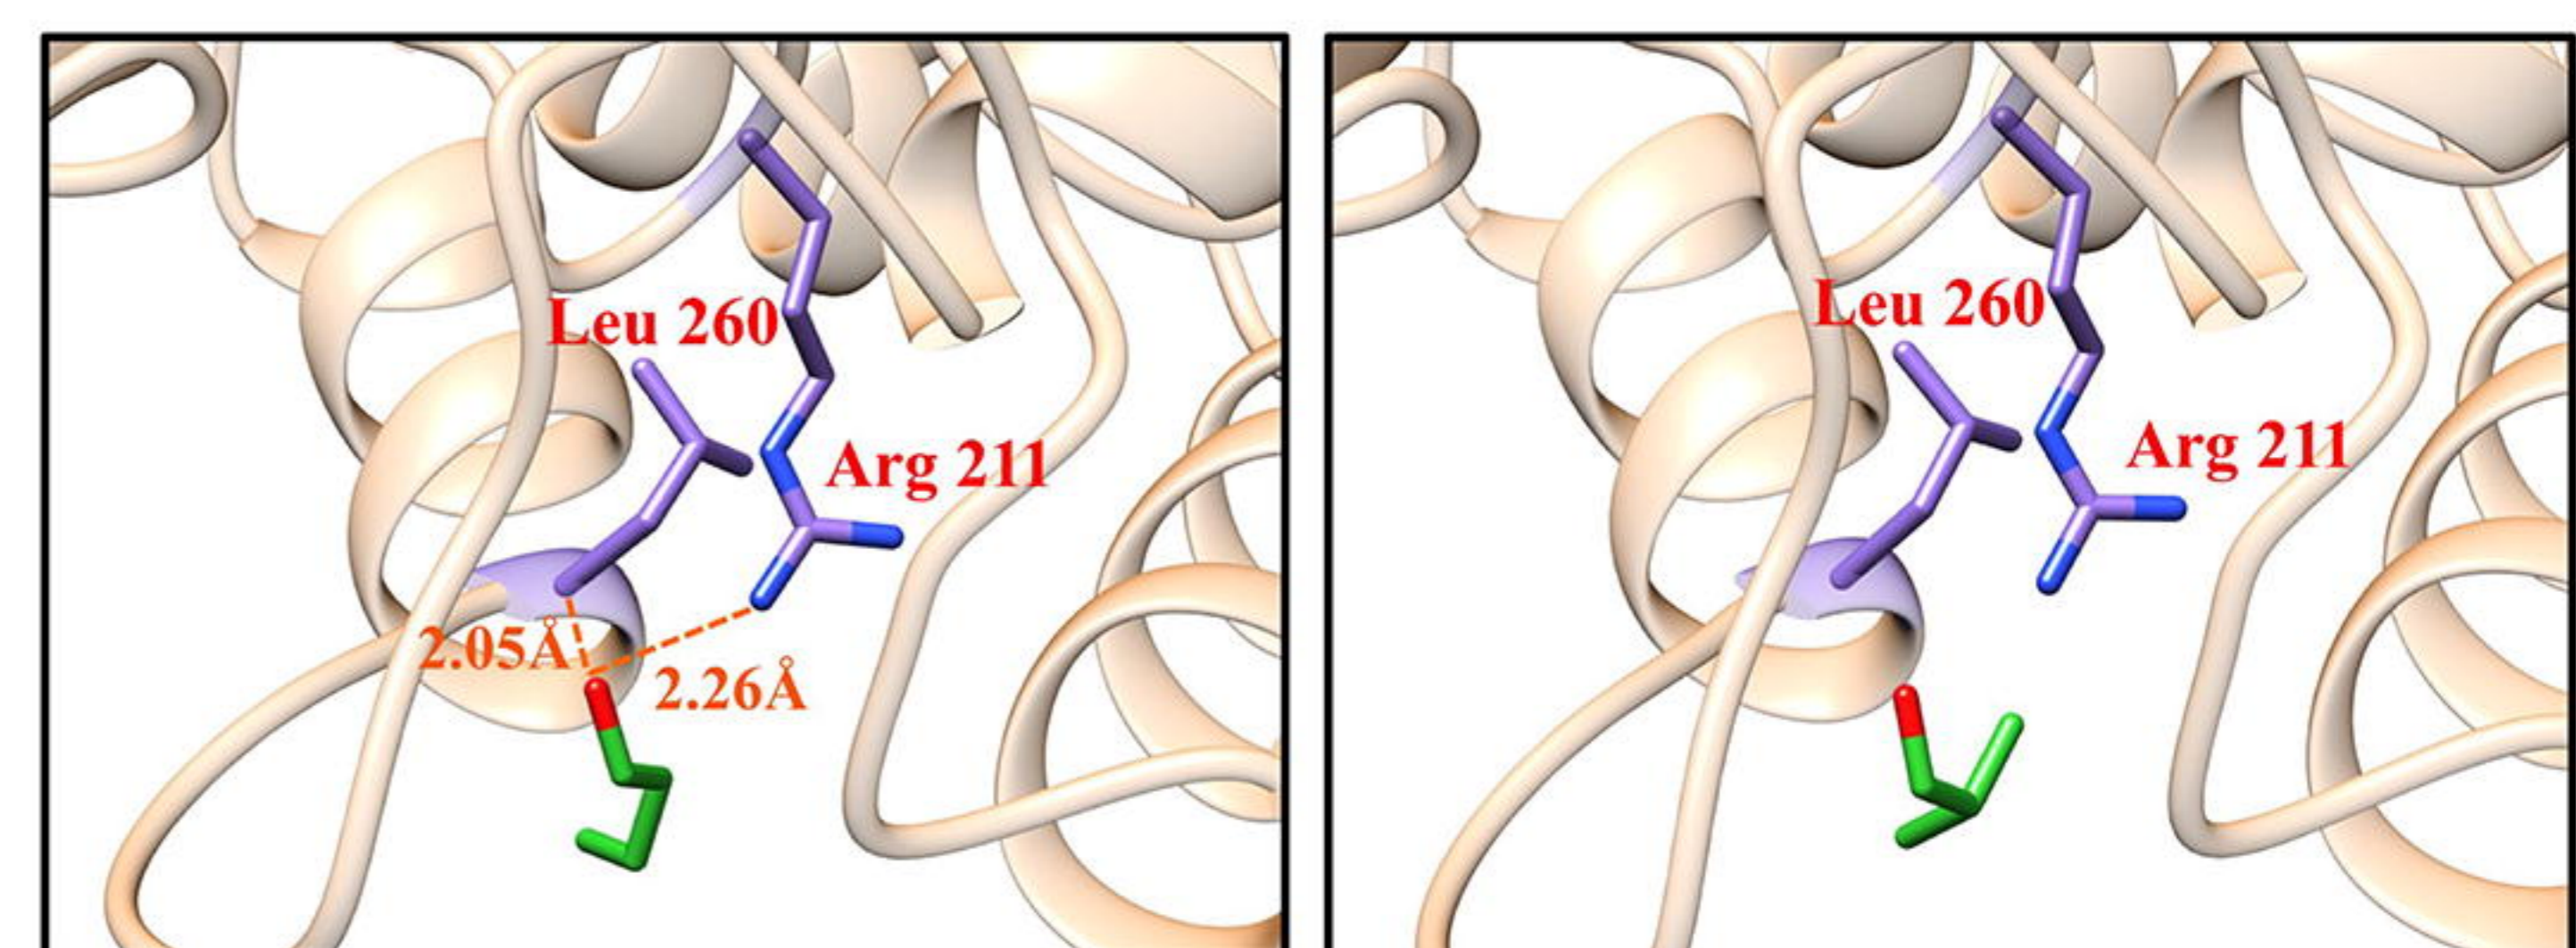

I183T/D273N with n-butanol

I183T/D273N with isobutanol

No interaction

**A**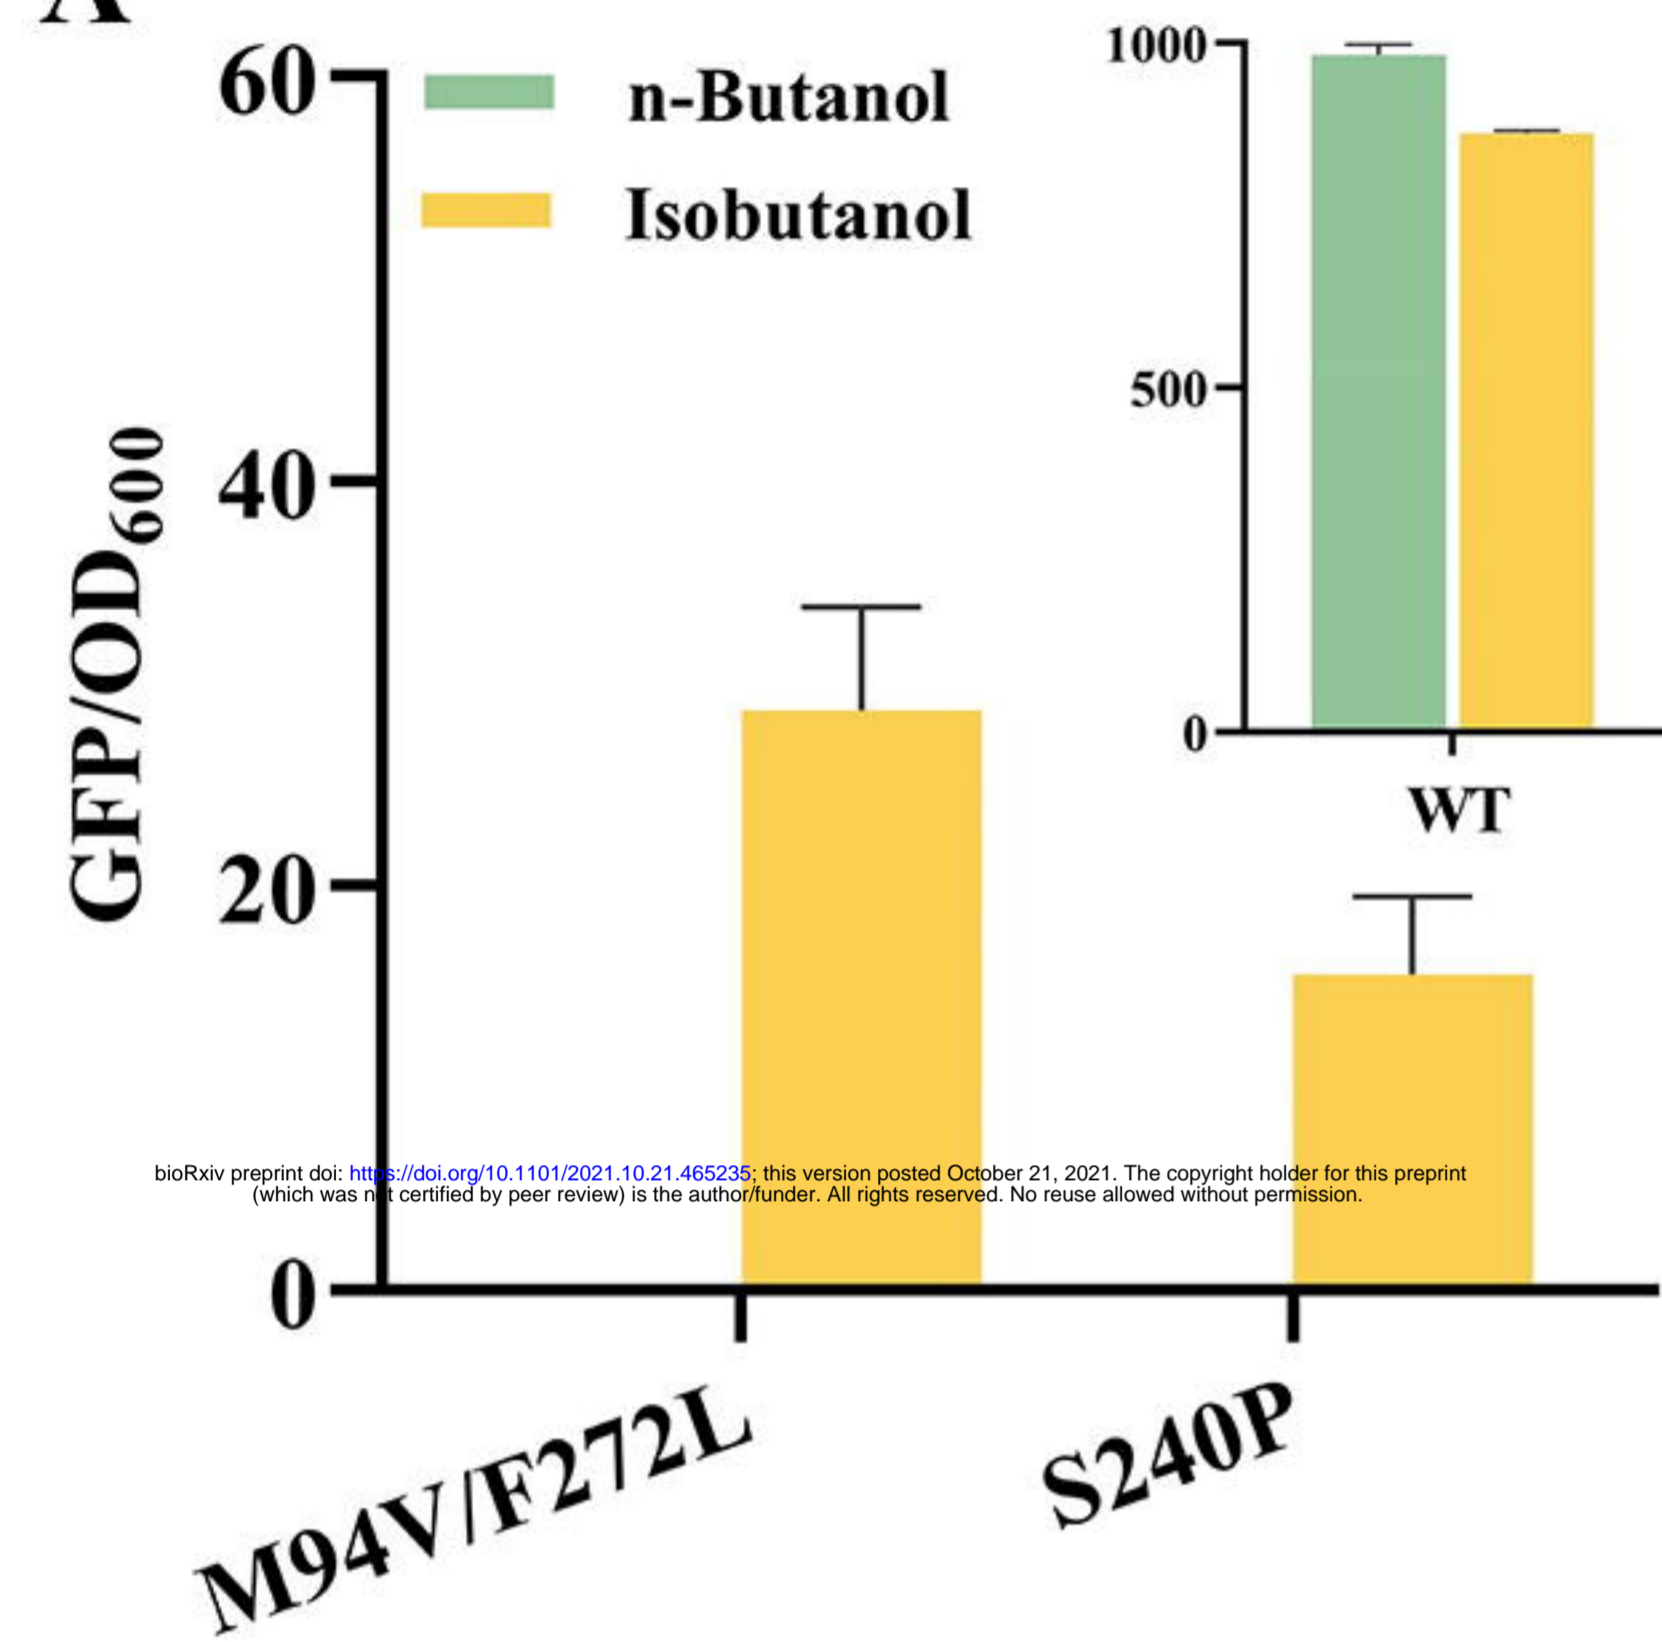**B**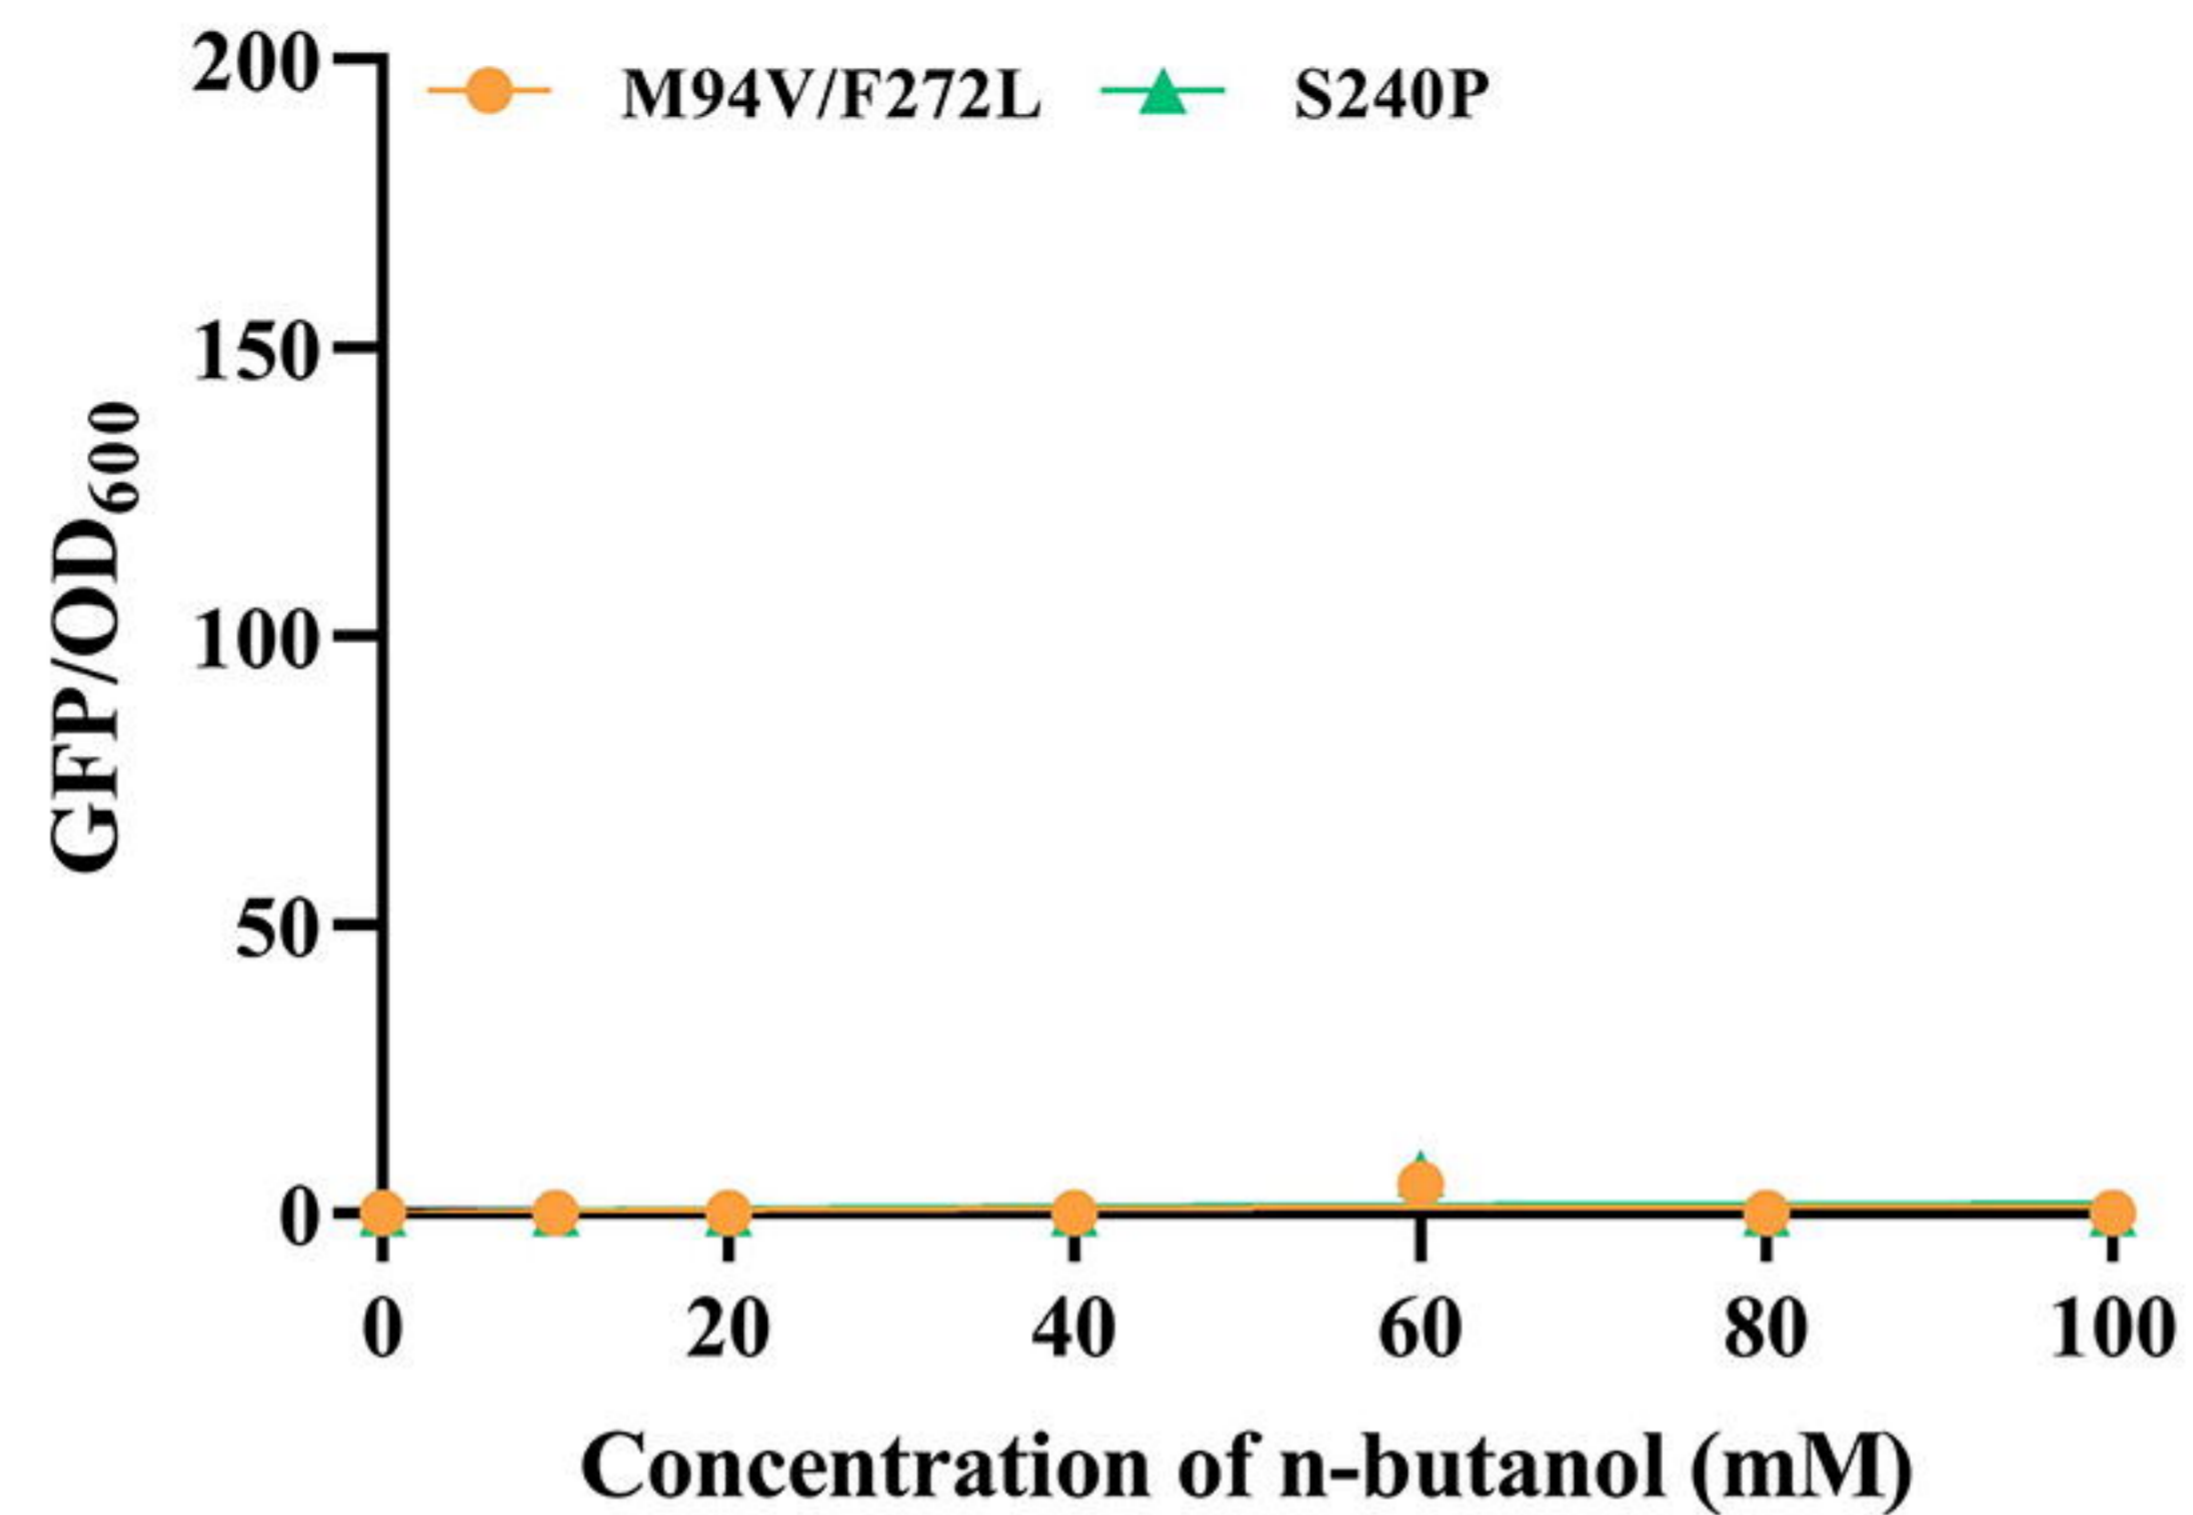**C**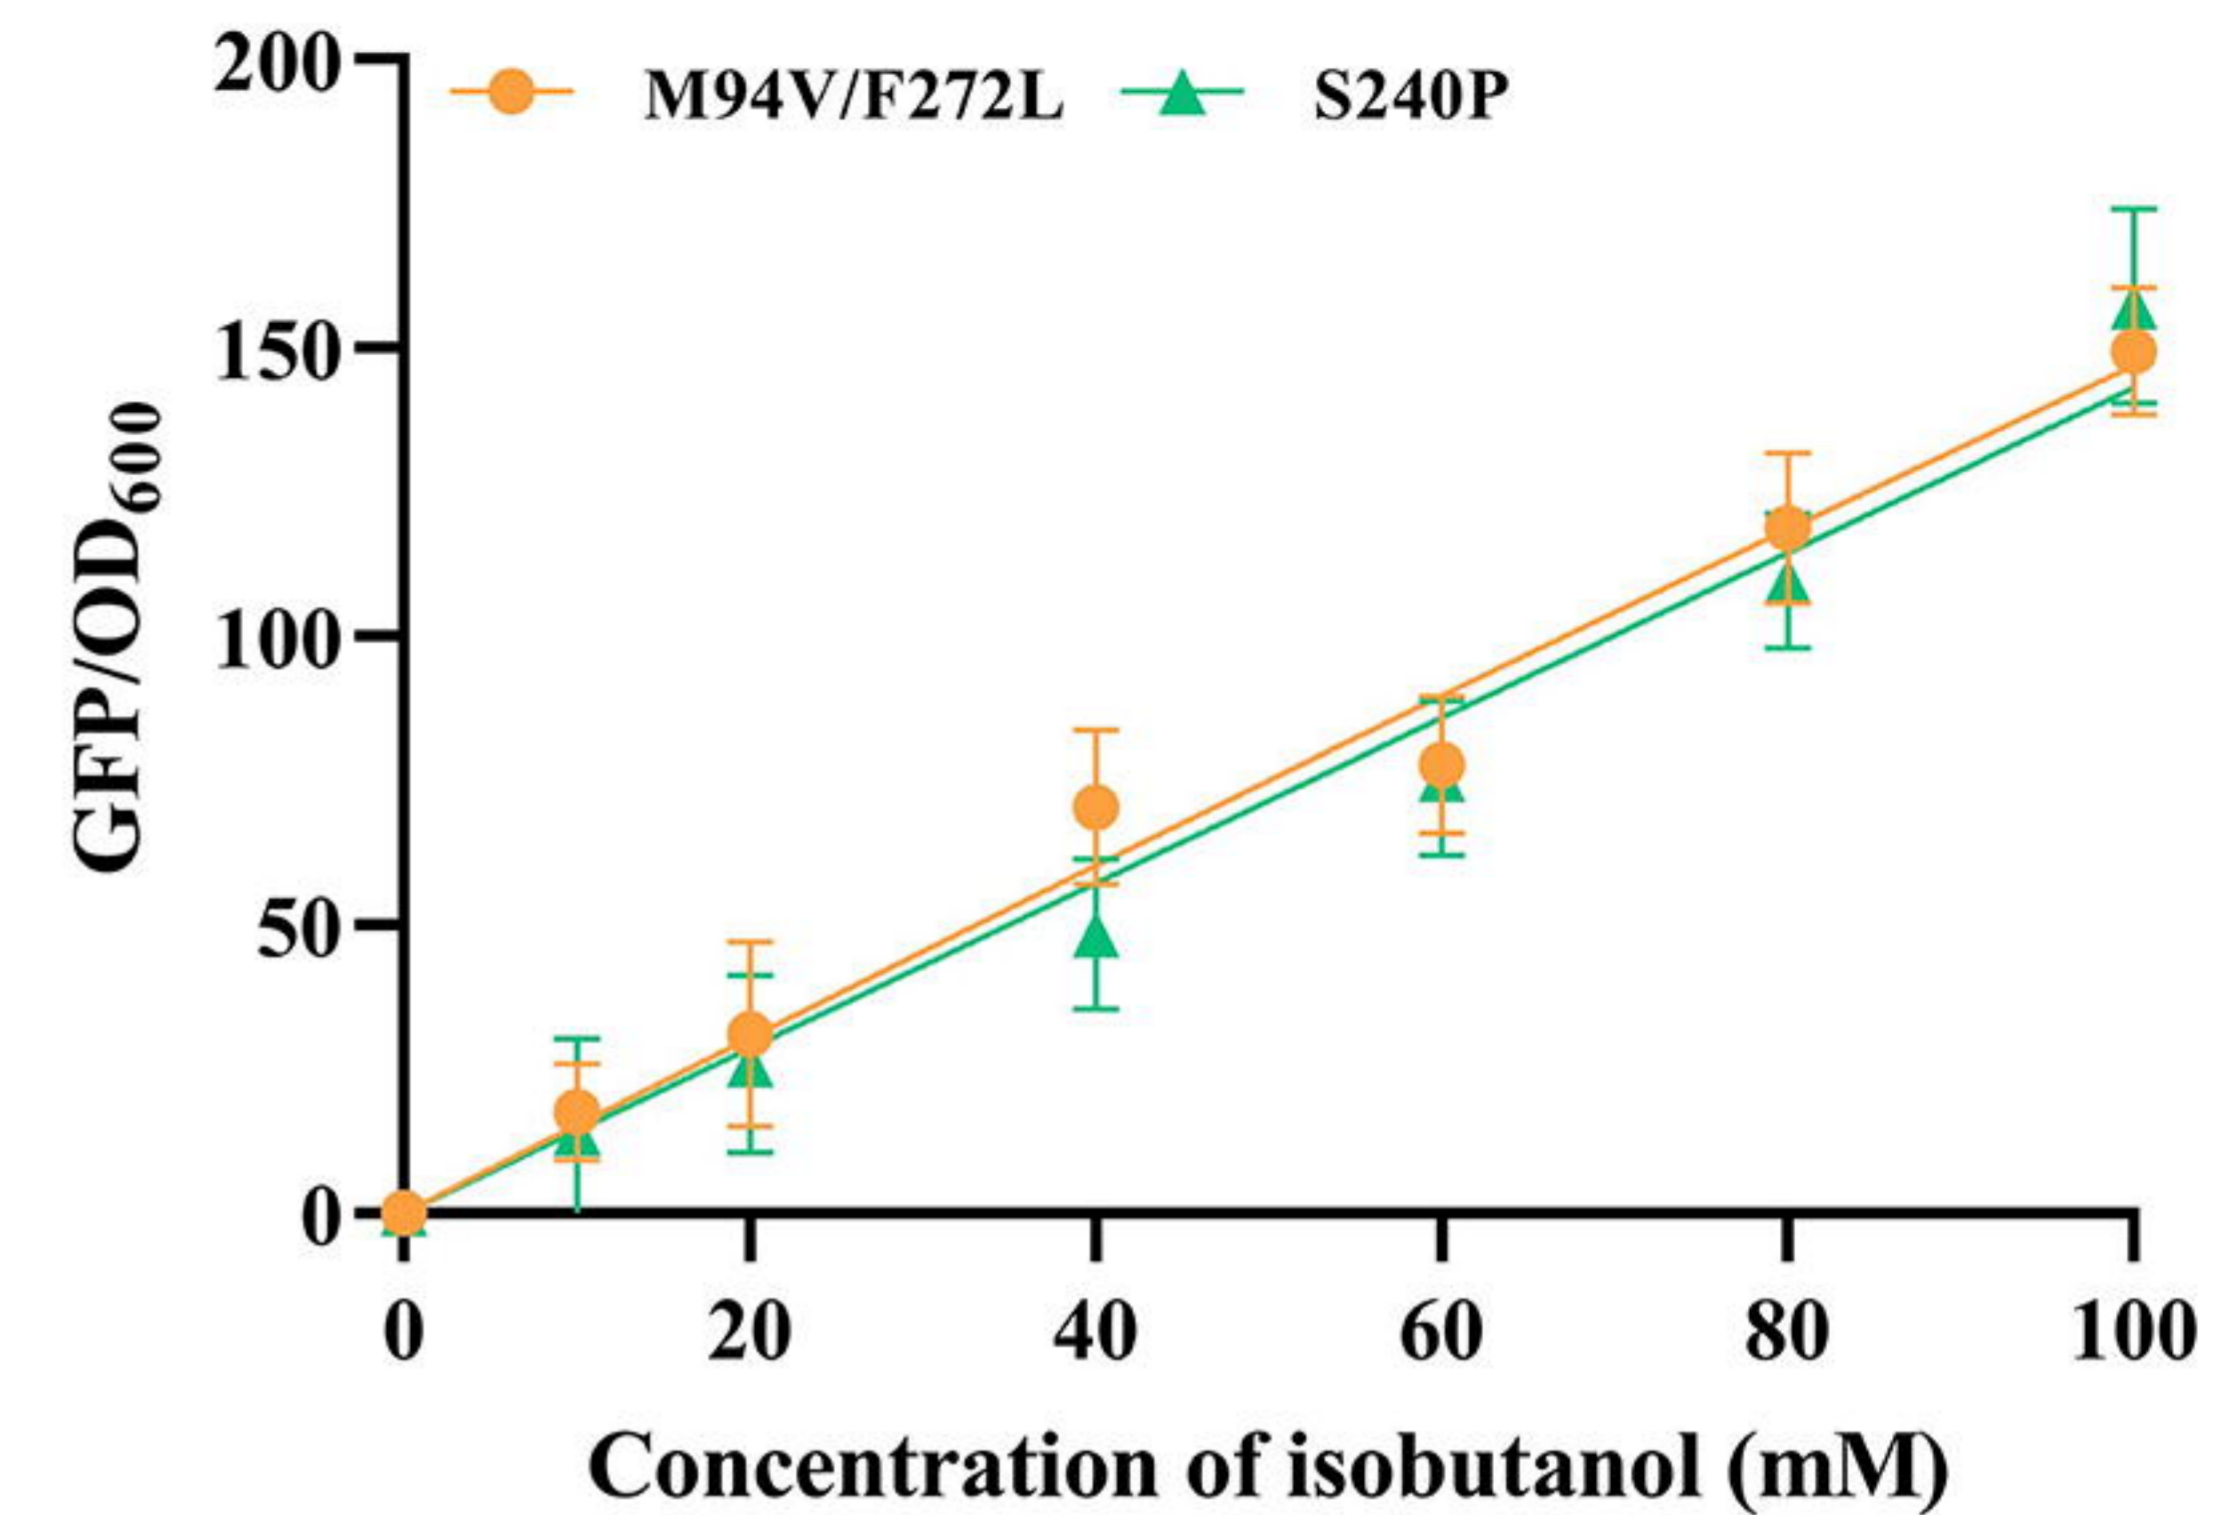**D**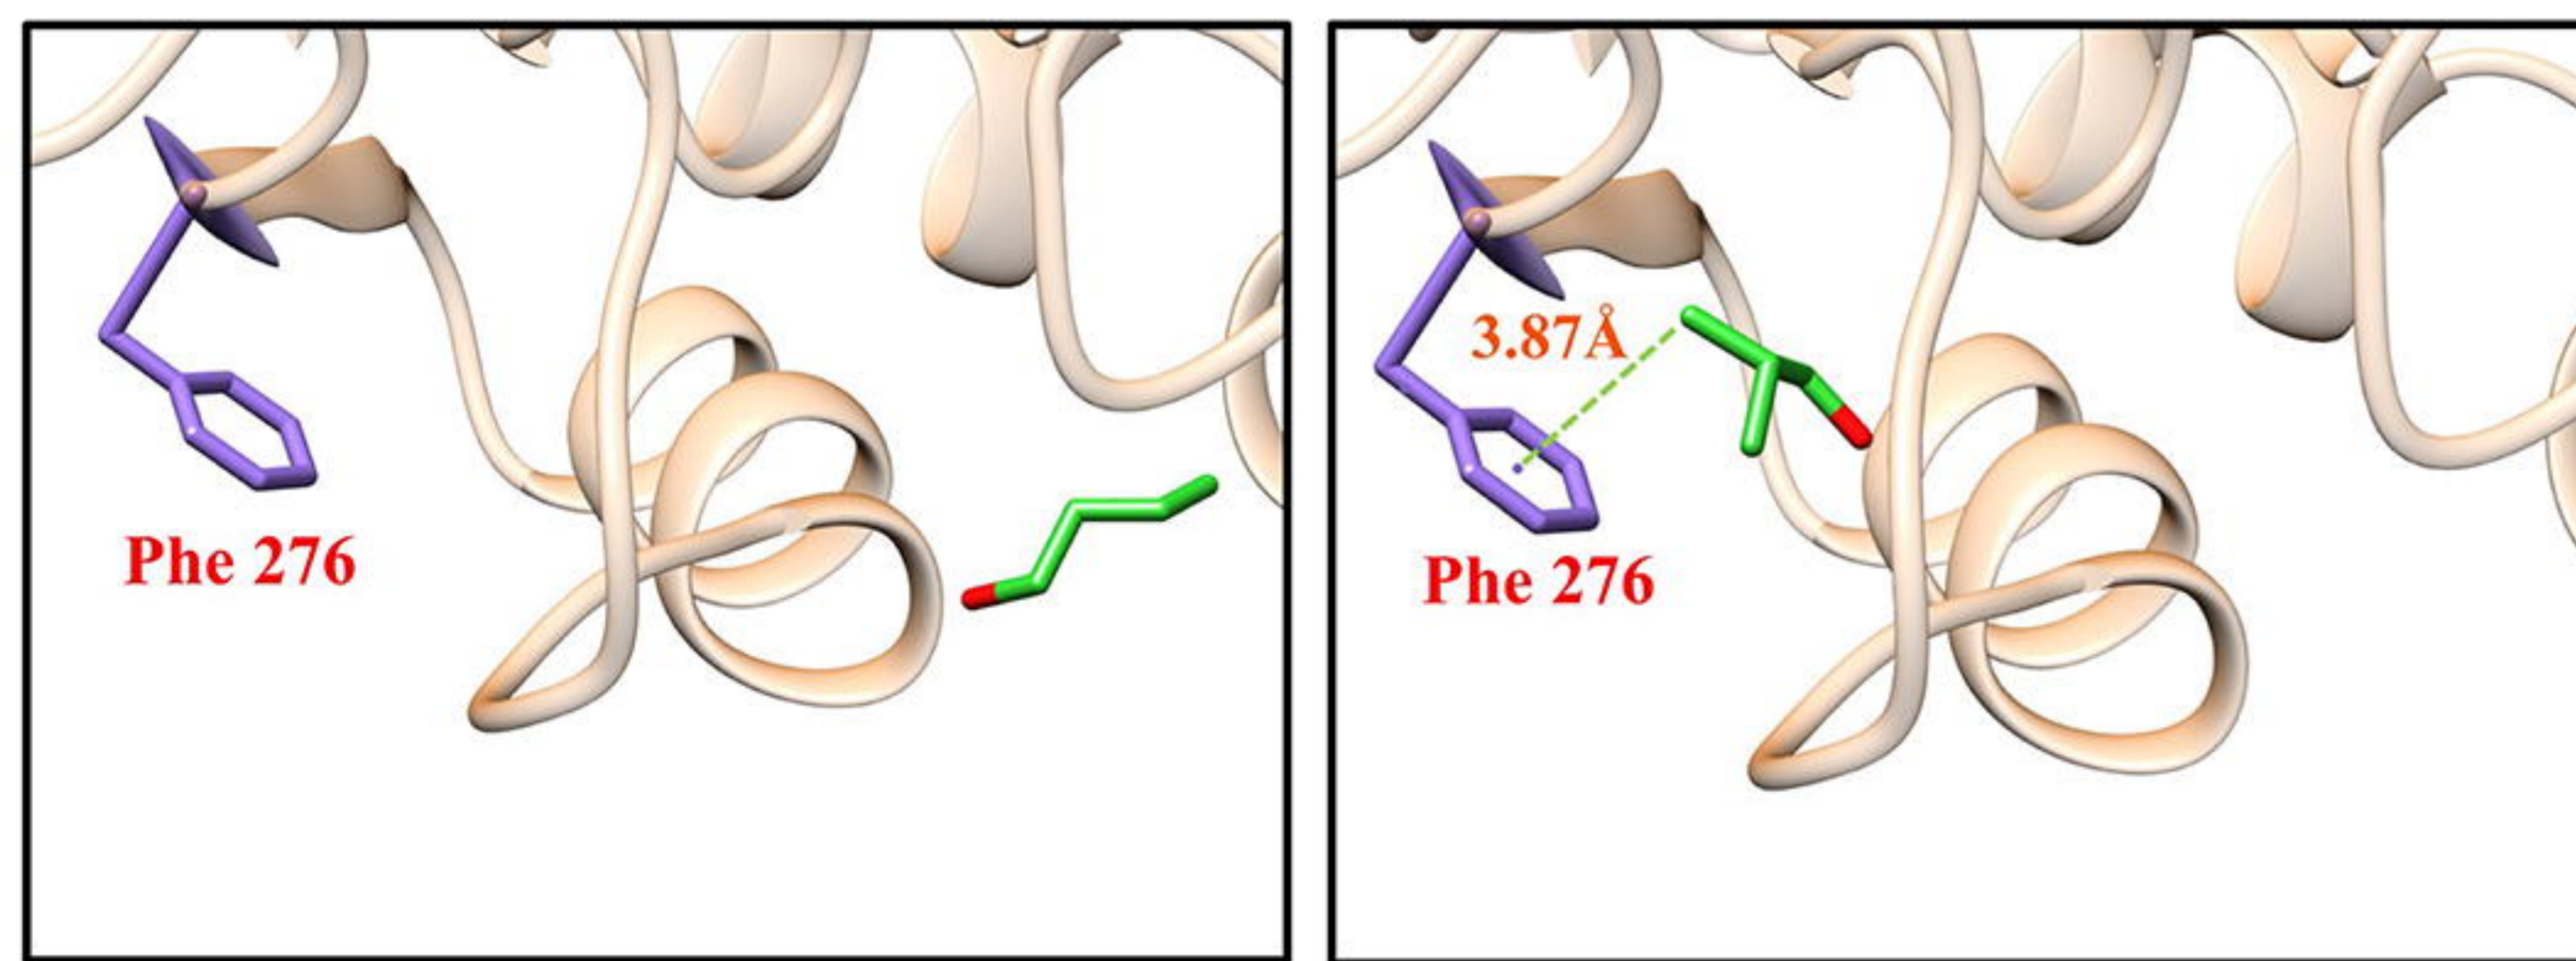**No interaction**

M94V/F272L with n-butanol

M94V/F272L with isobutanol

**E**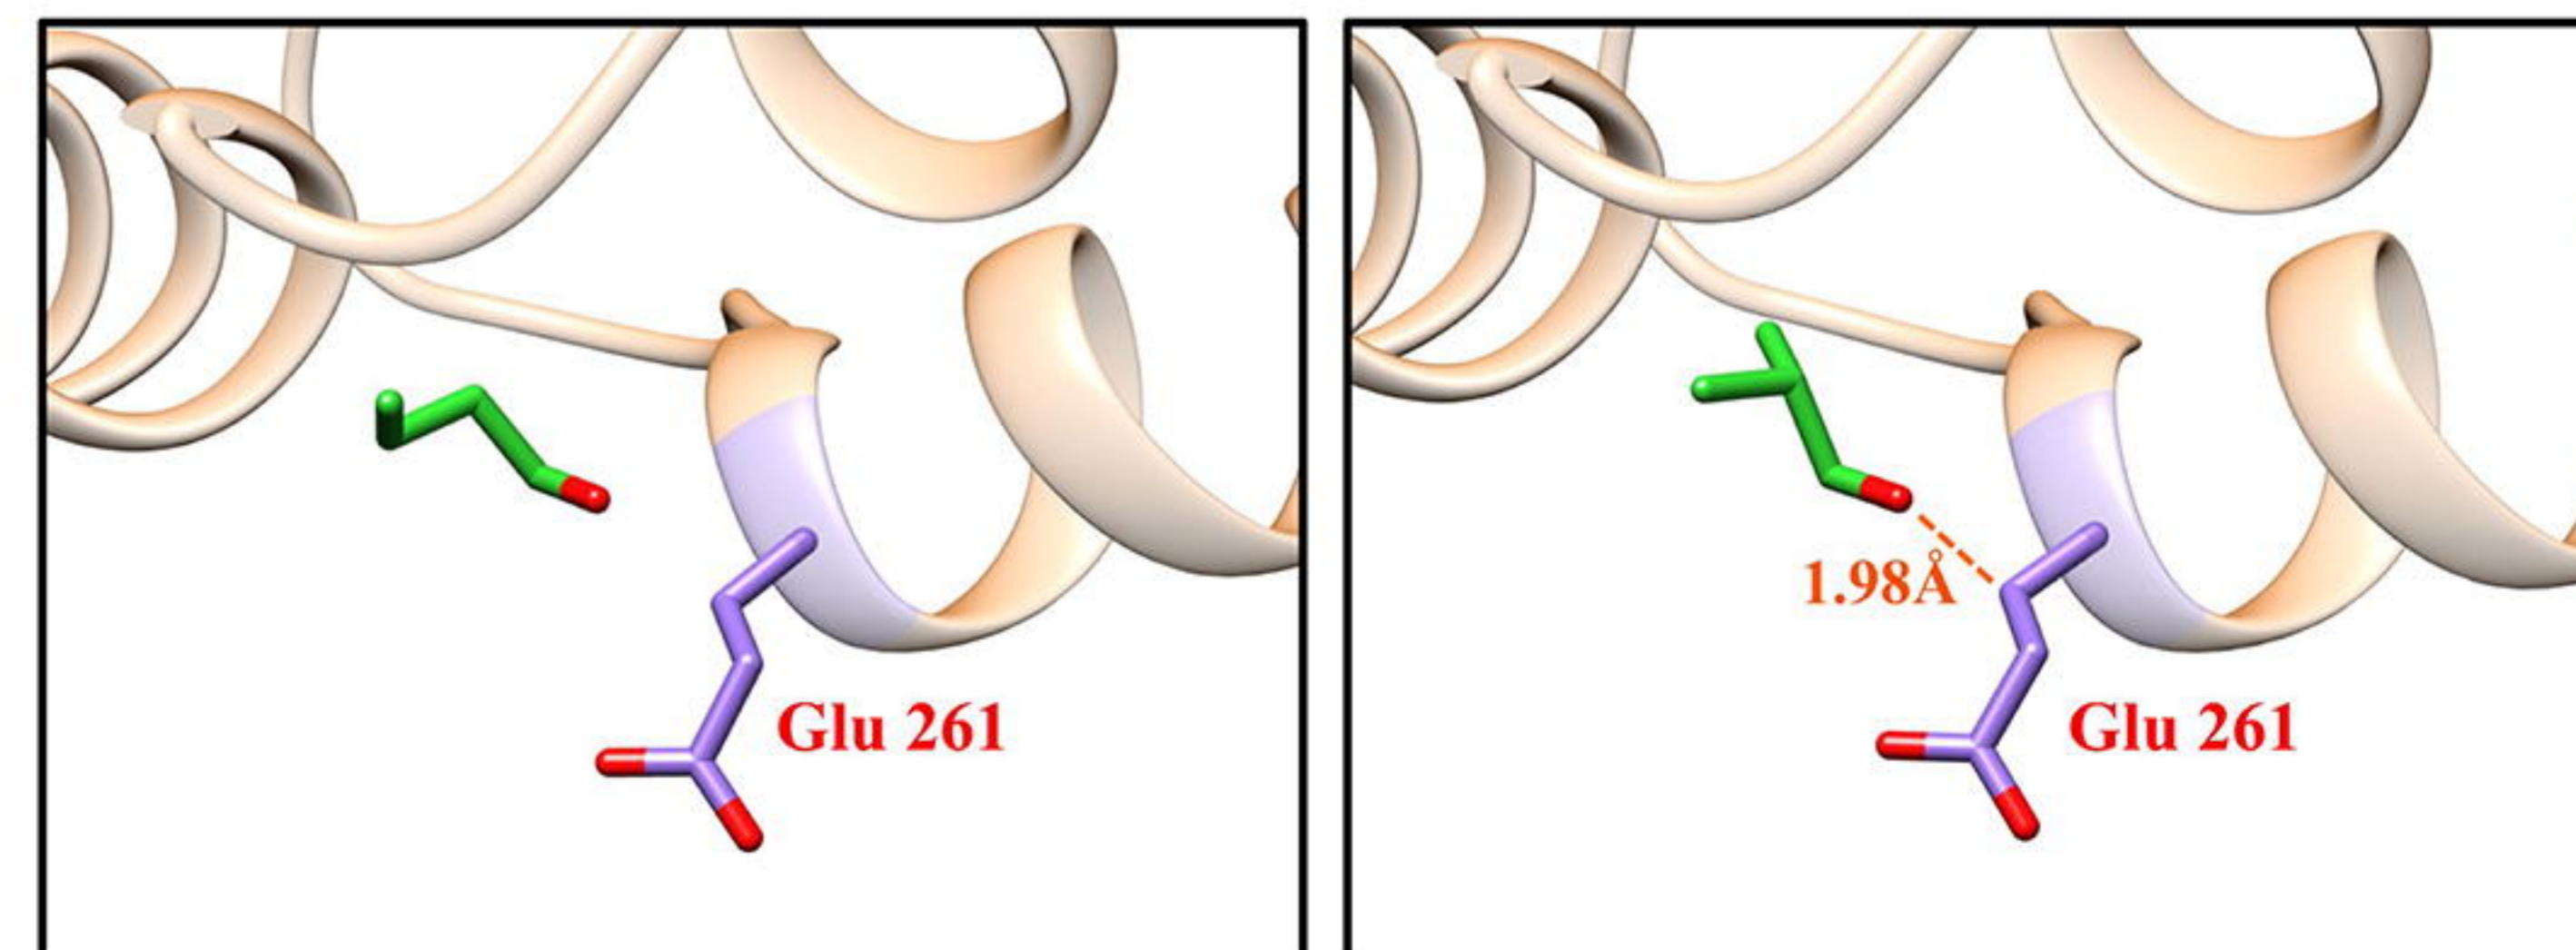**No interaction**

S240P with n-butanol

S240P with isobutanol

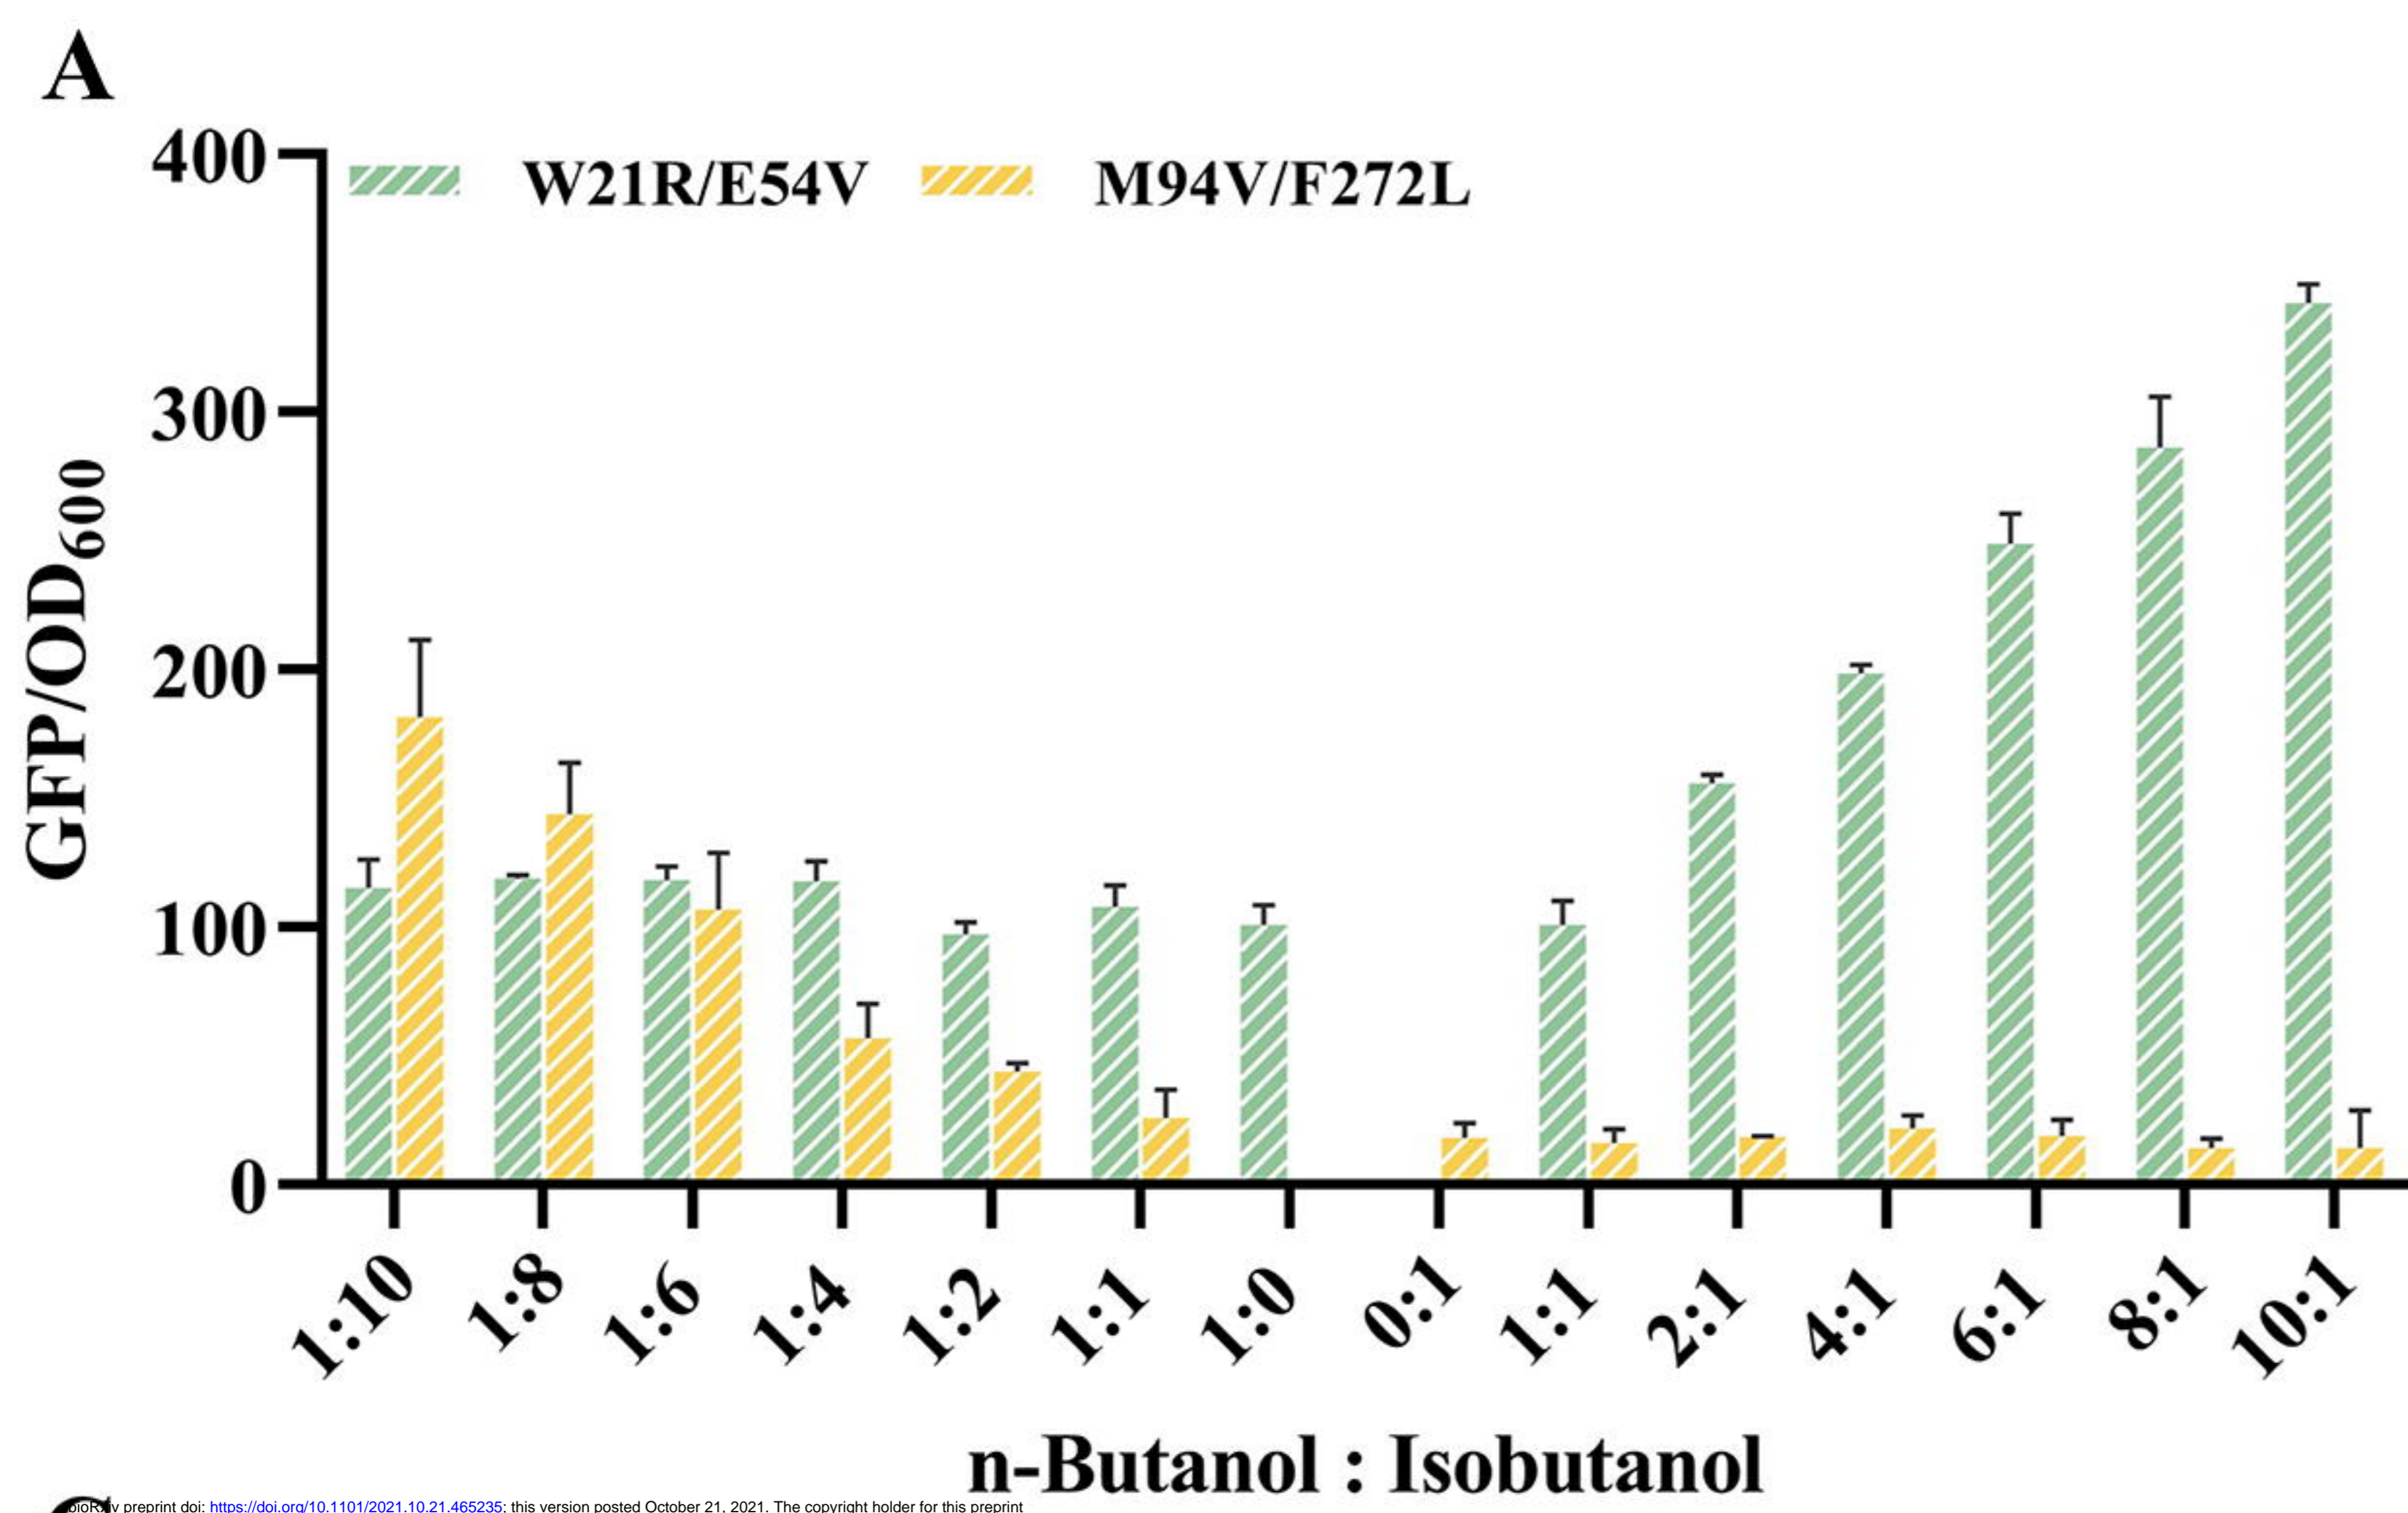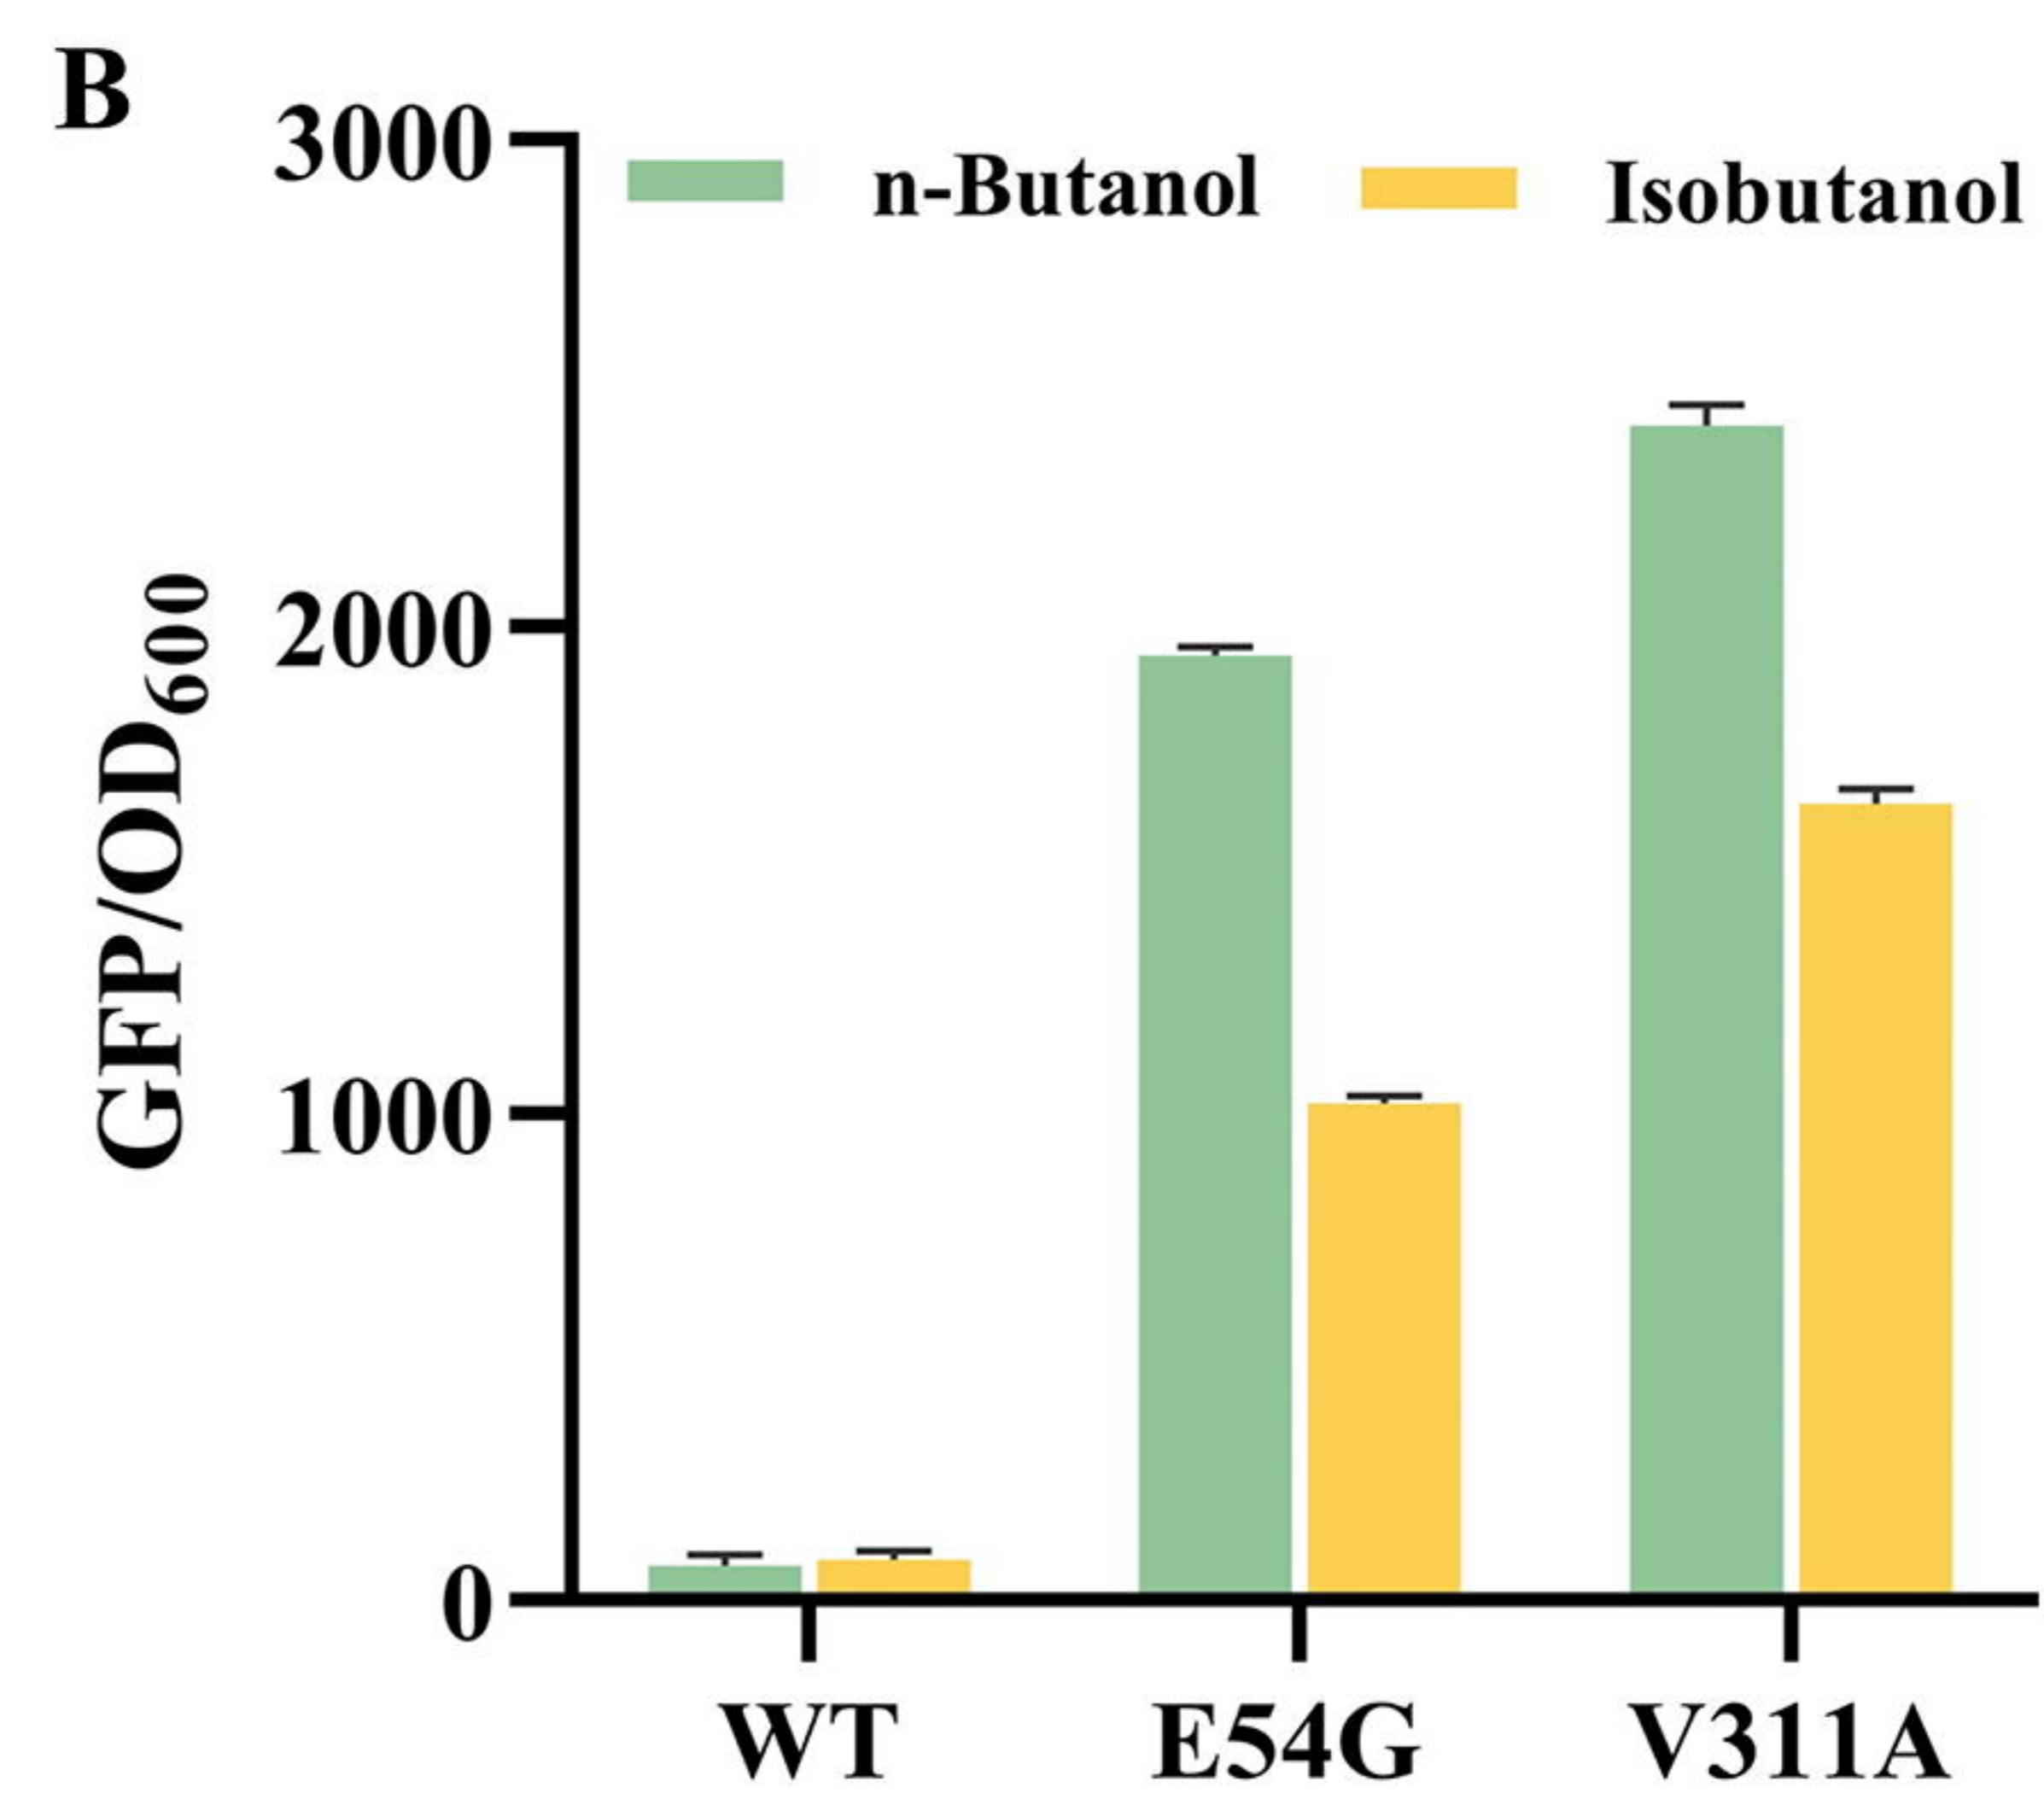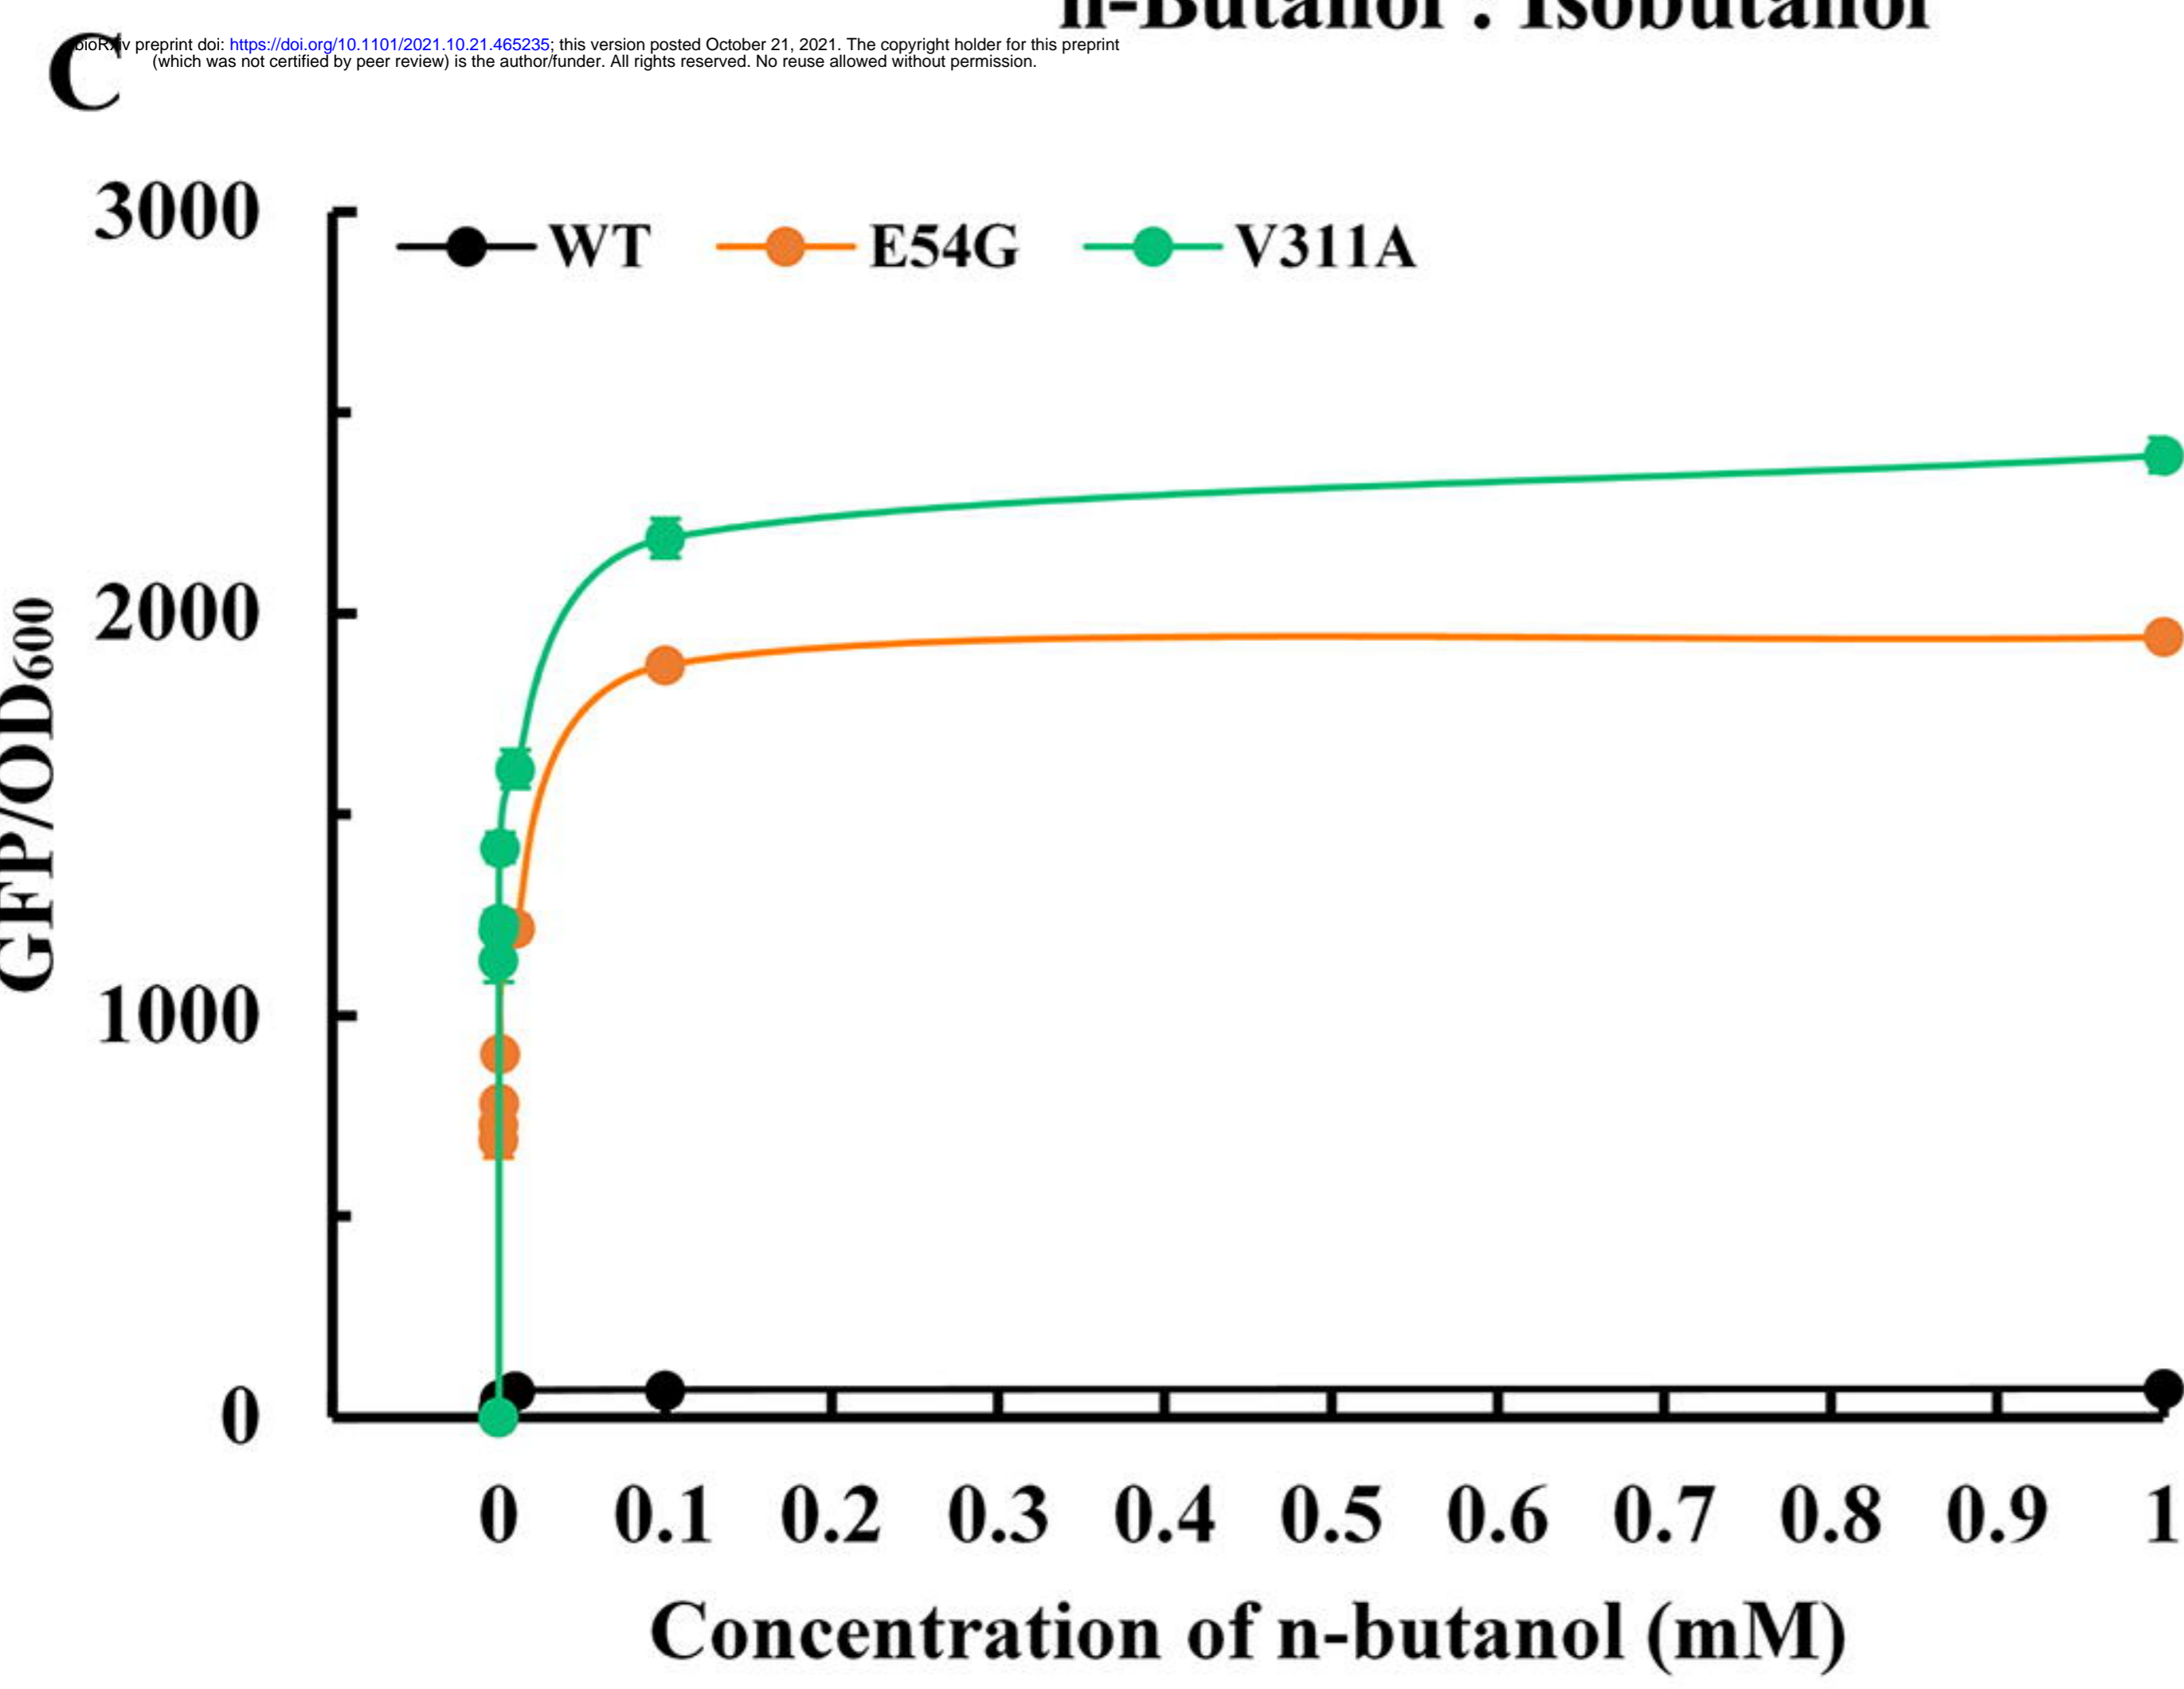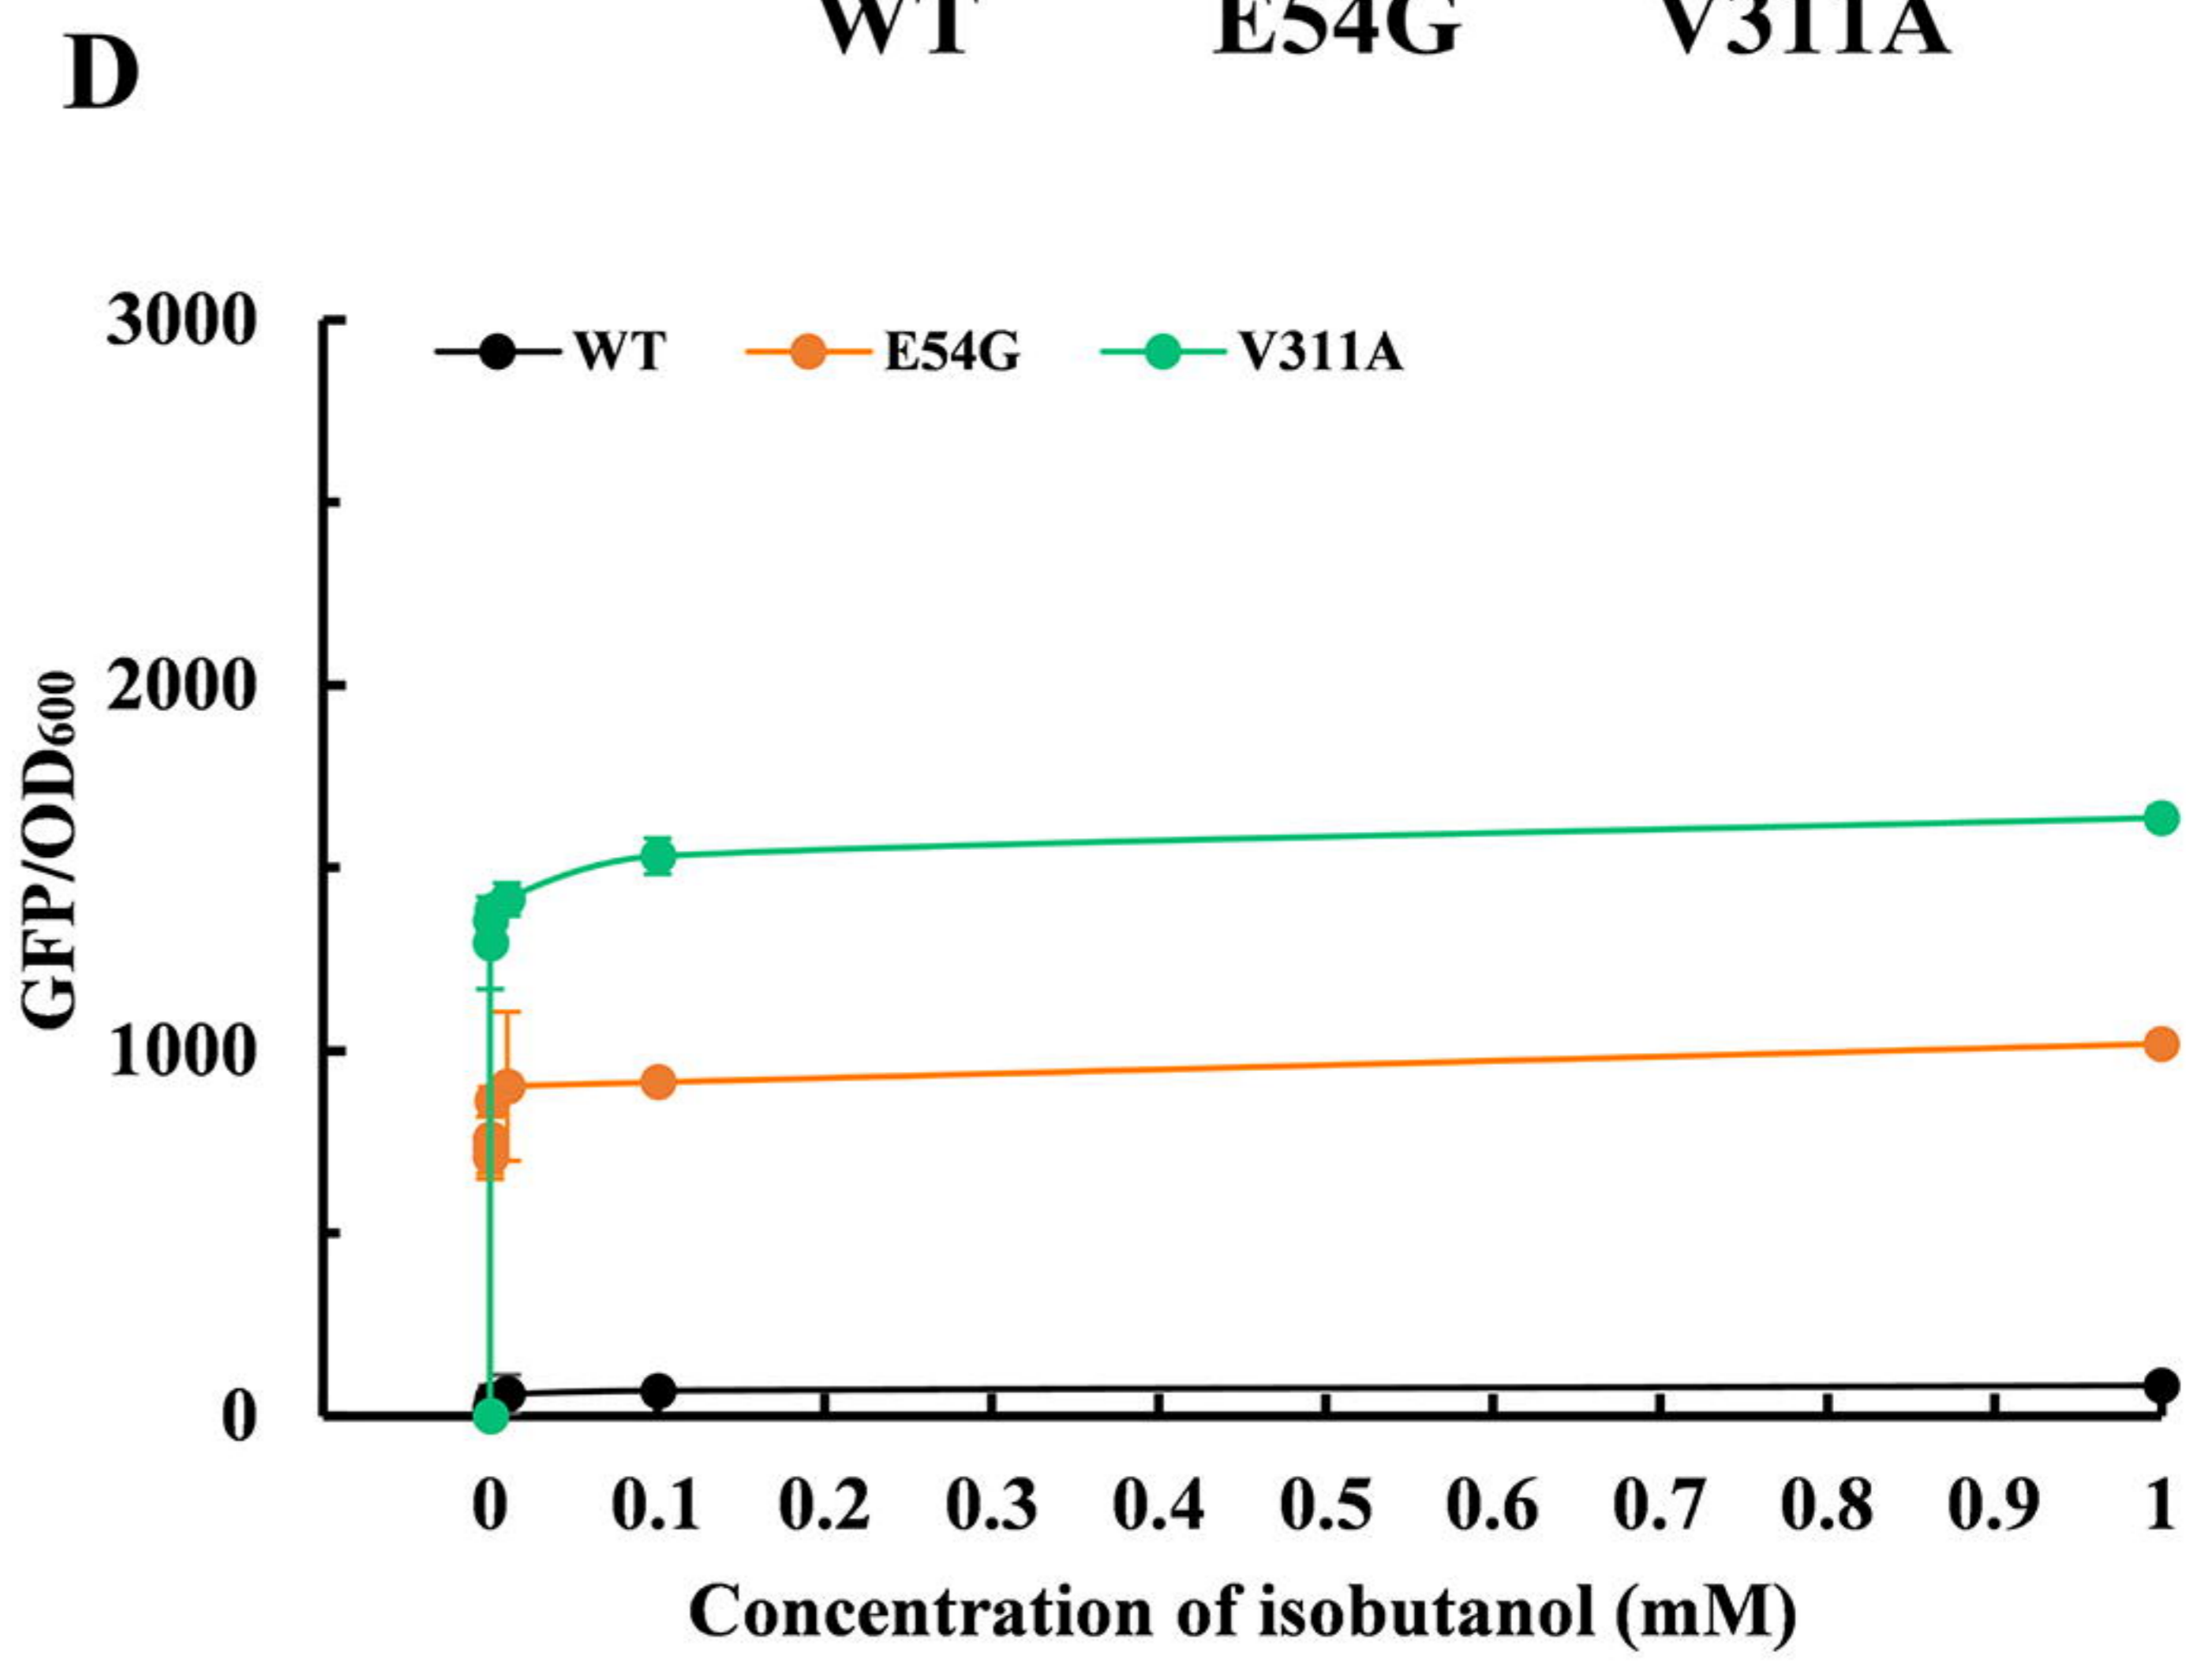

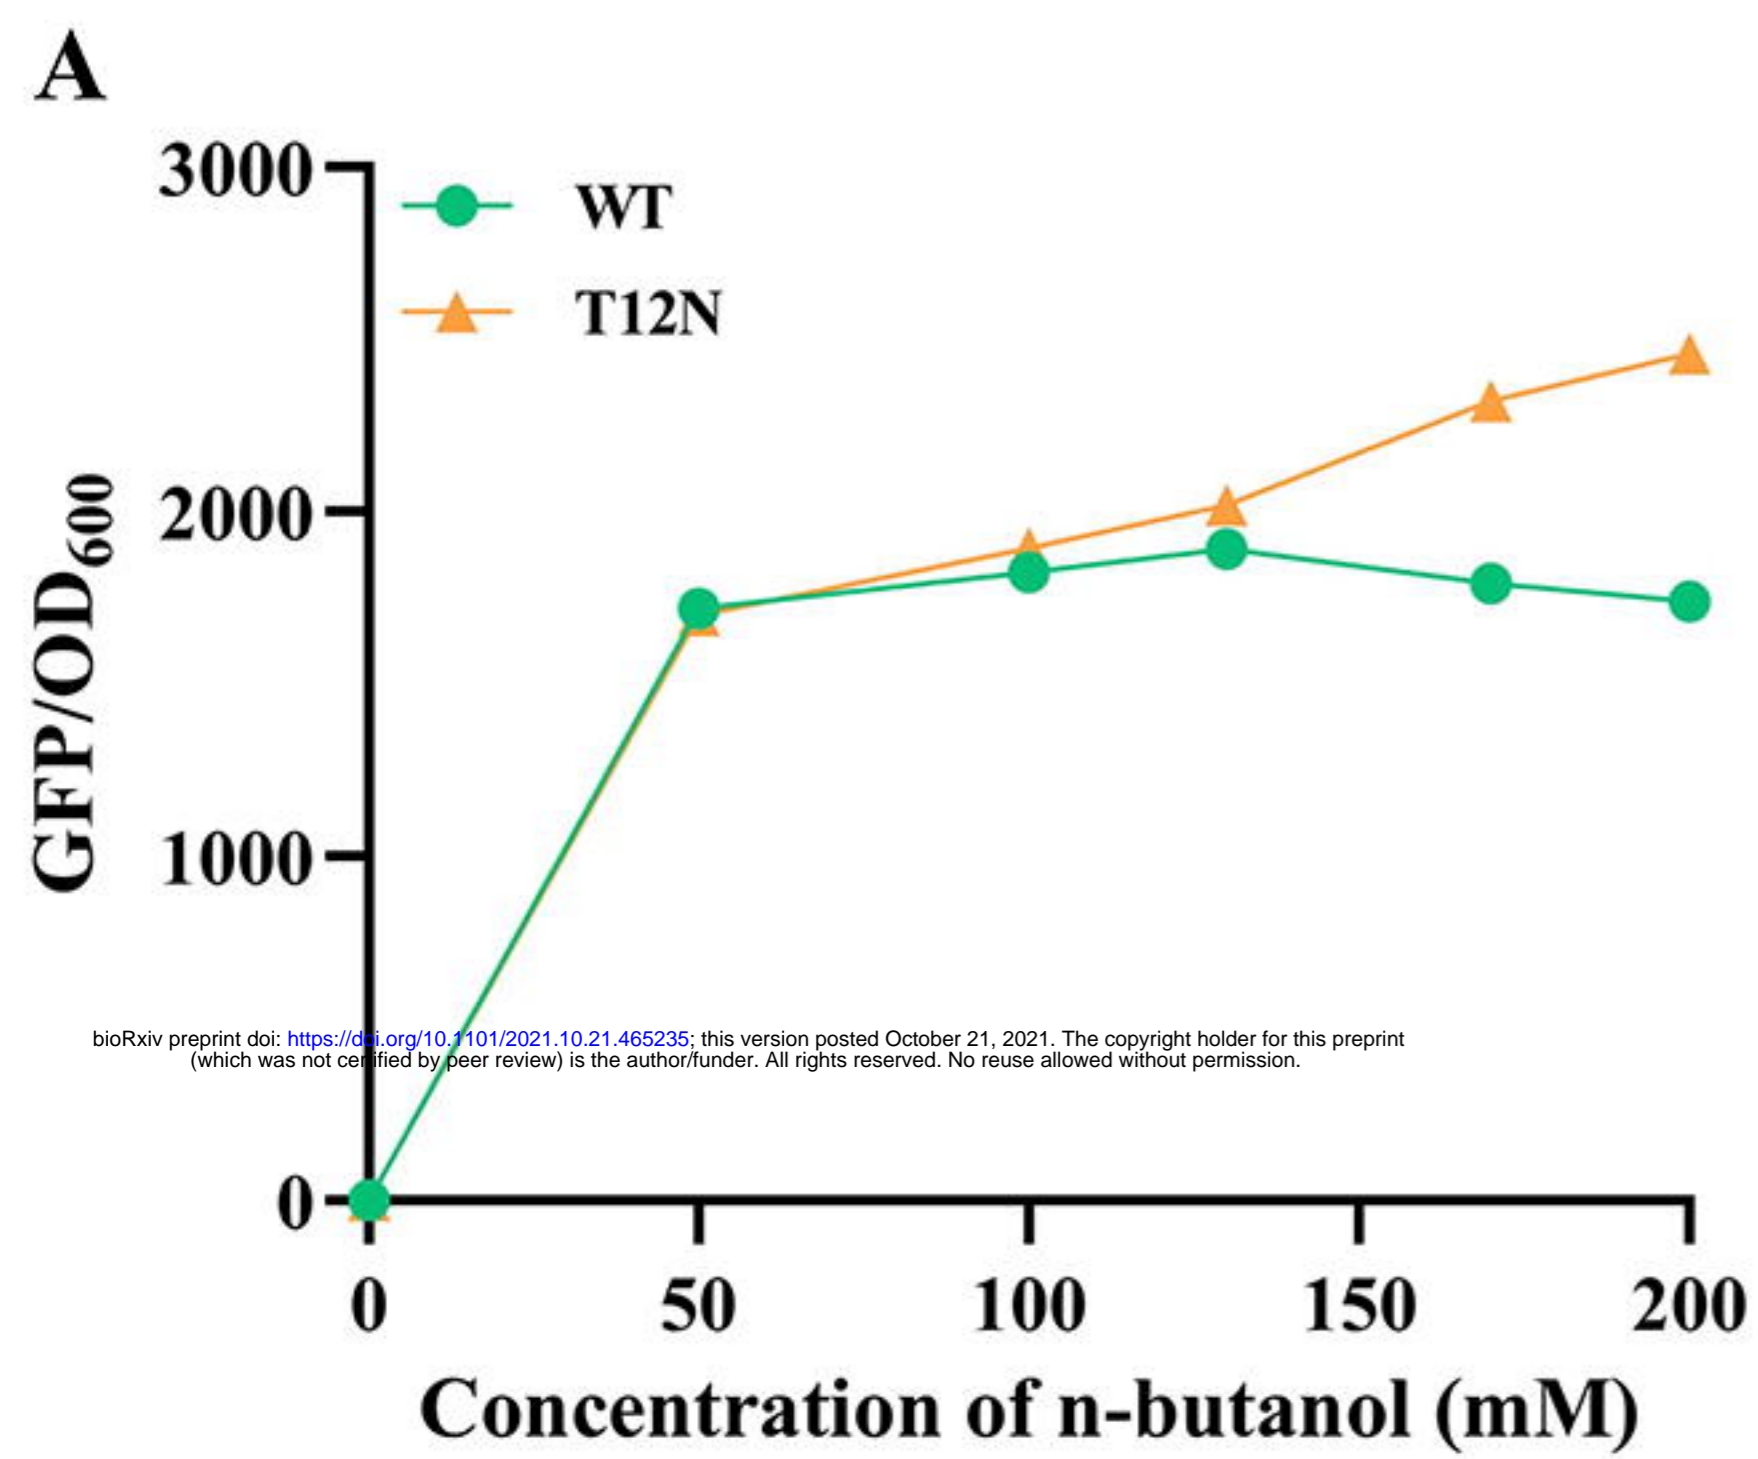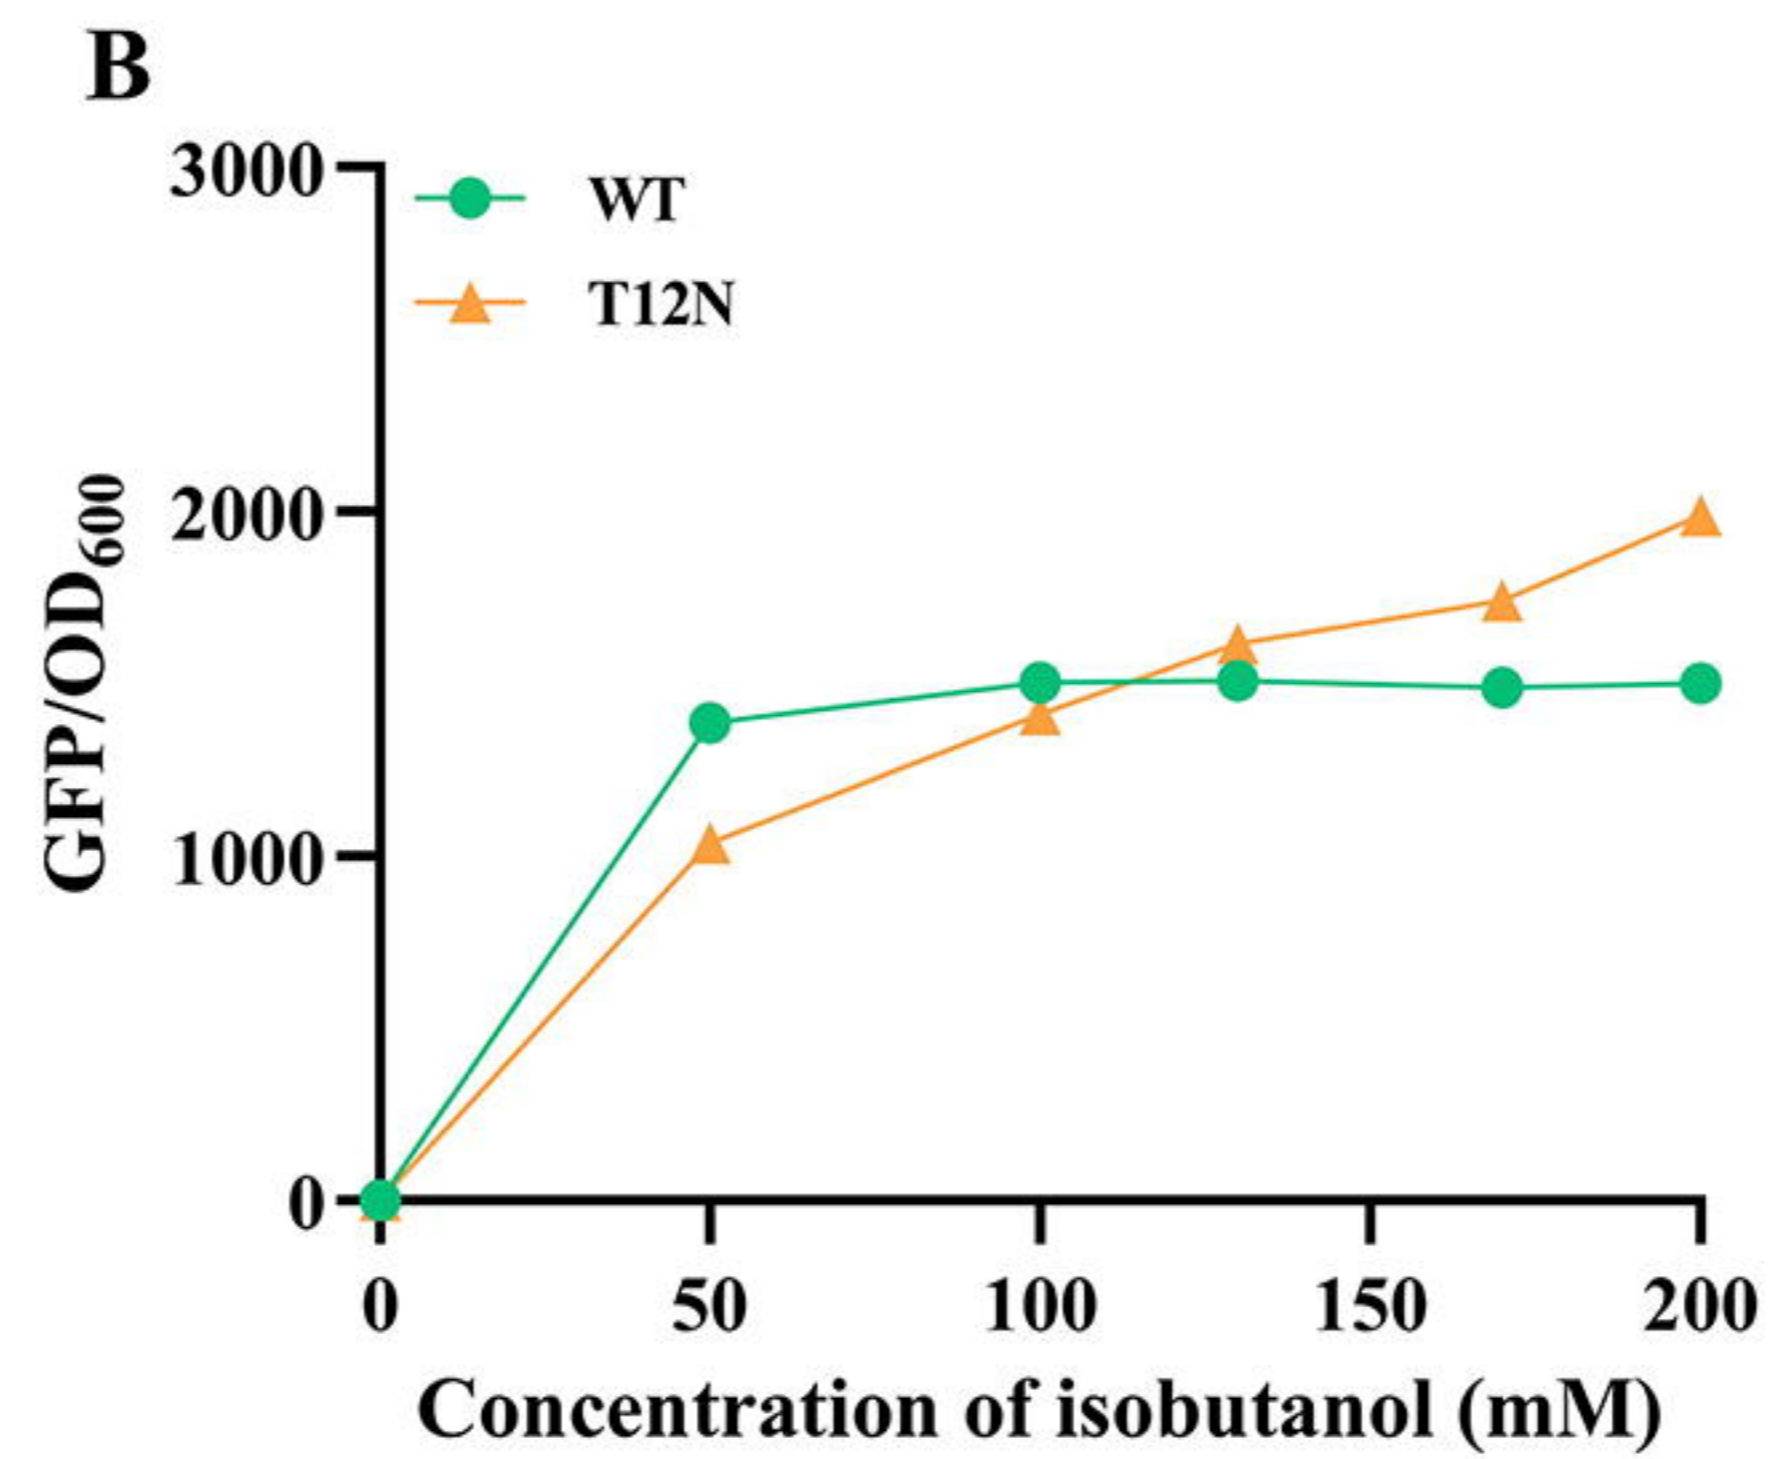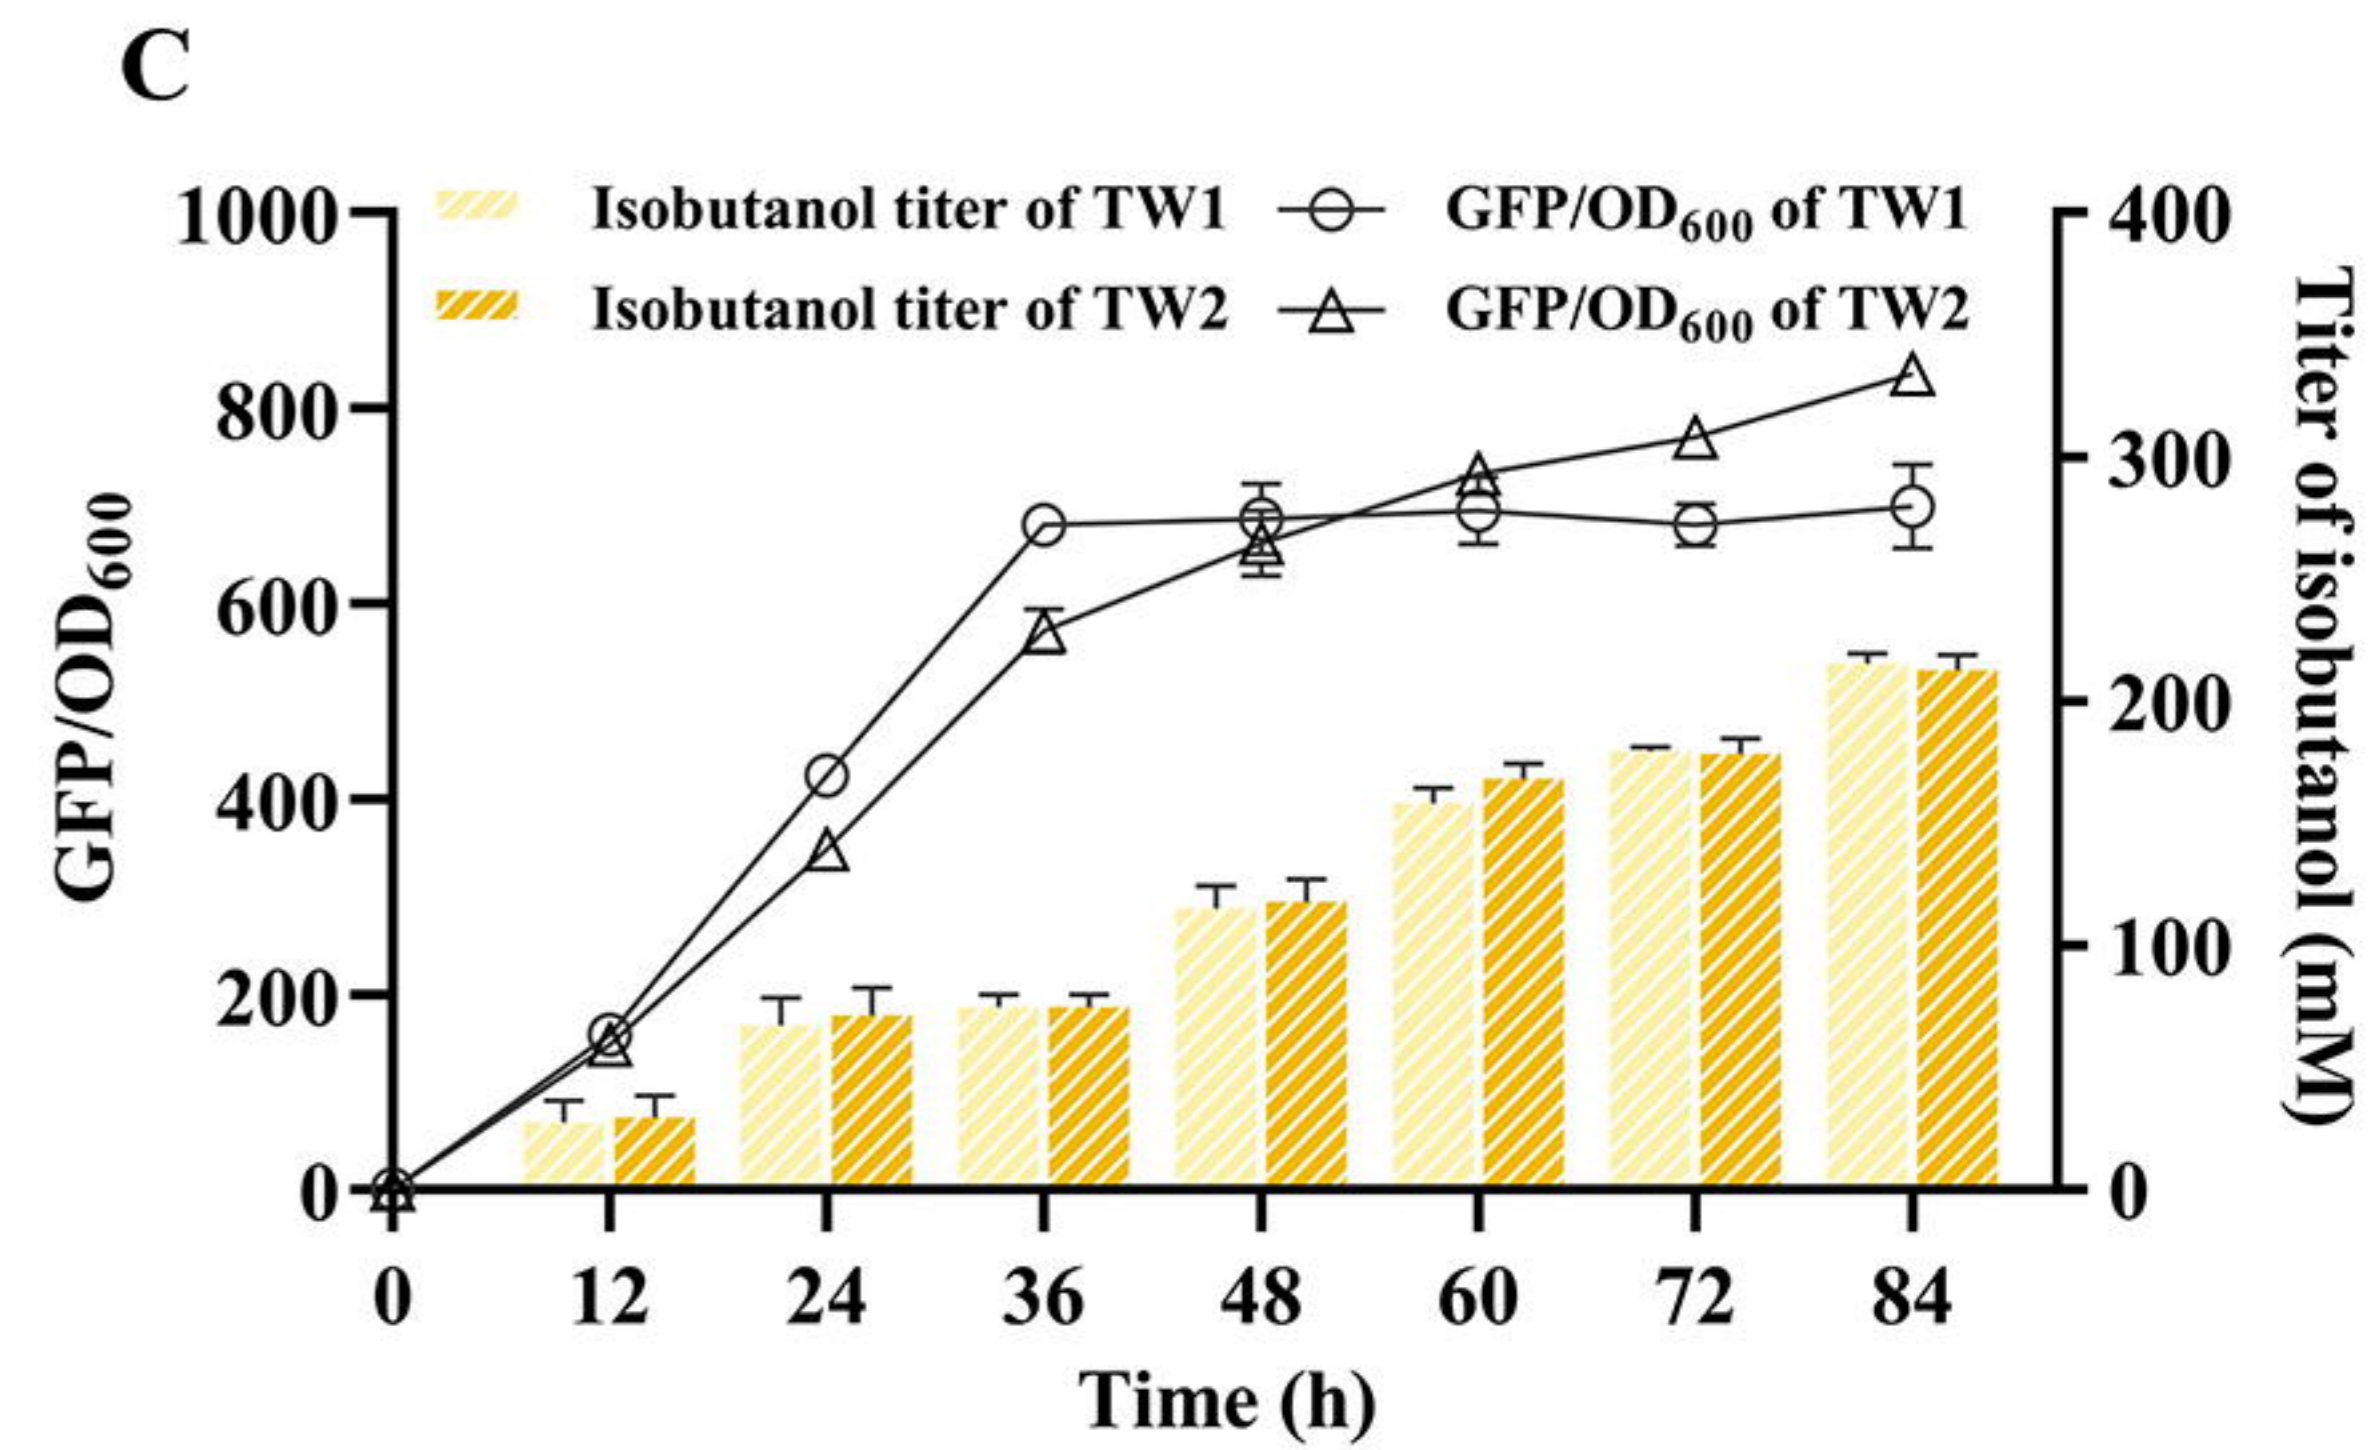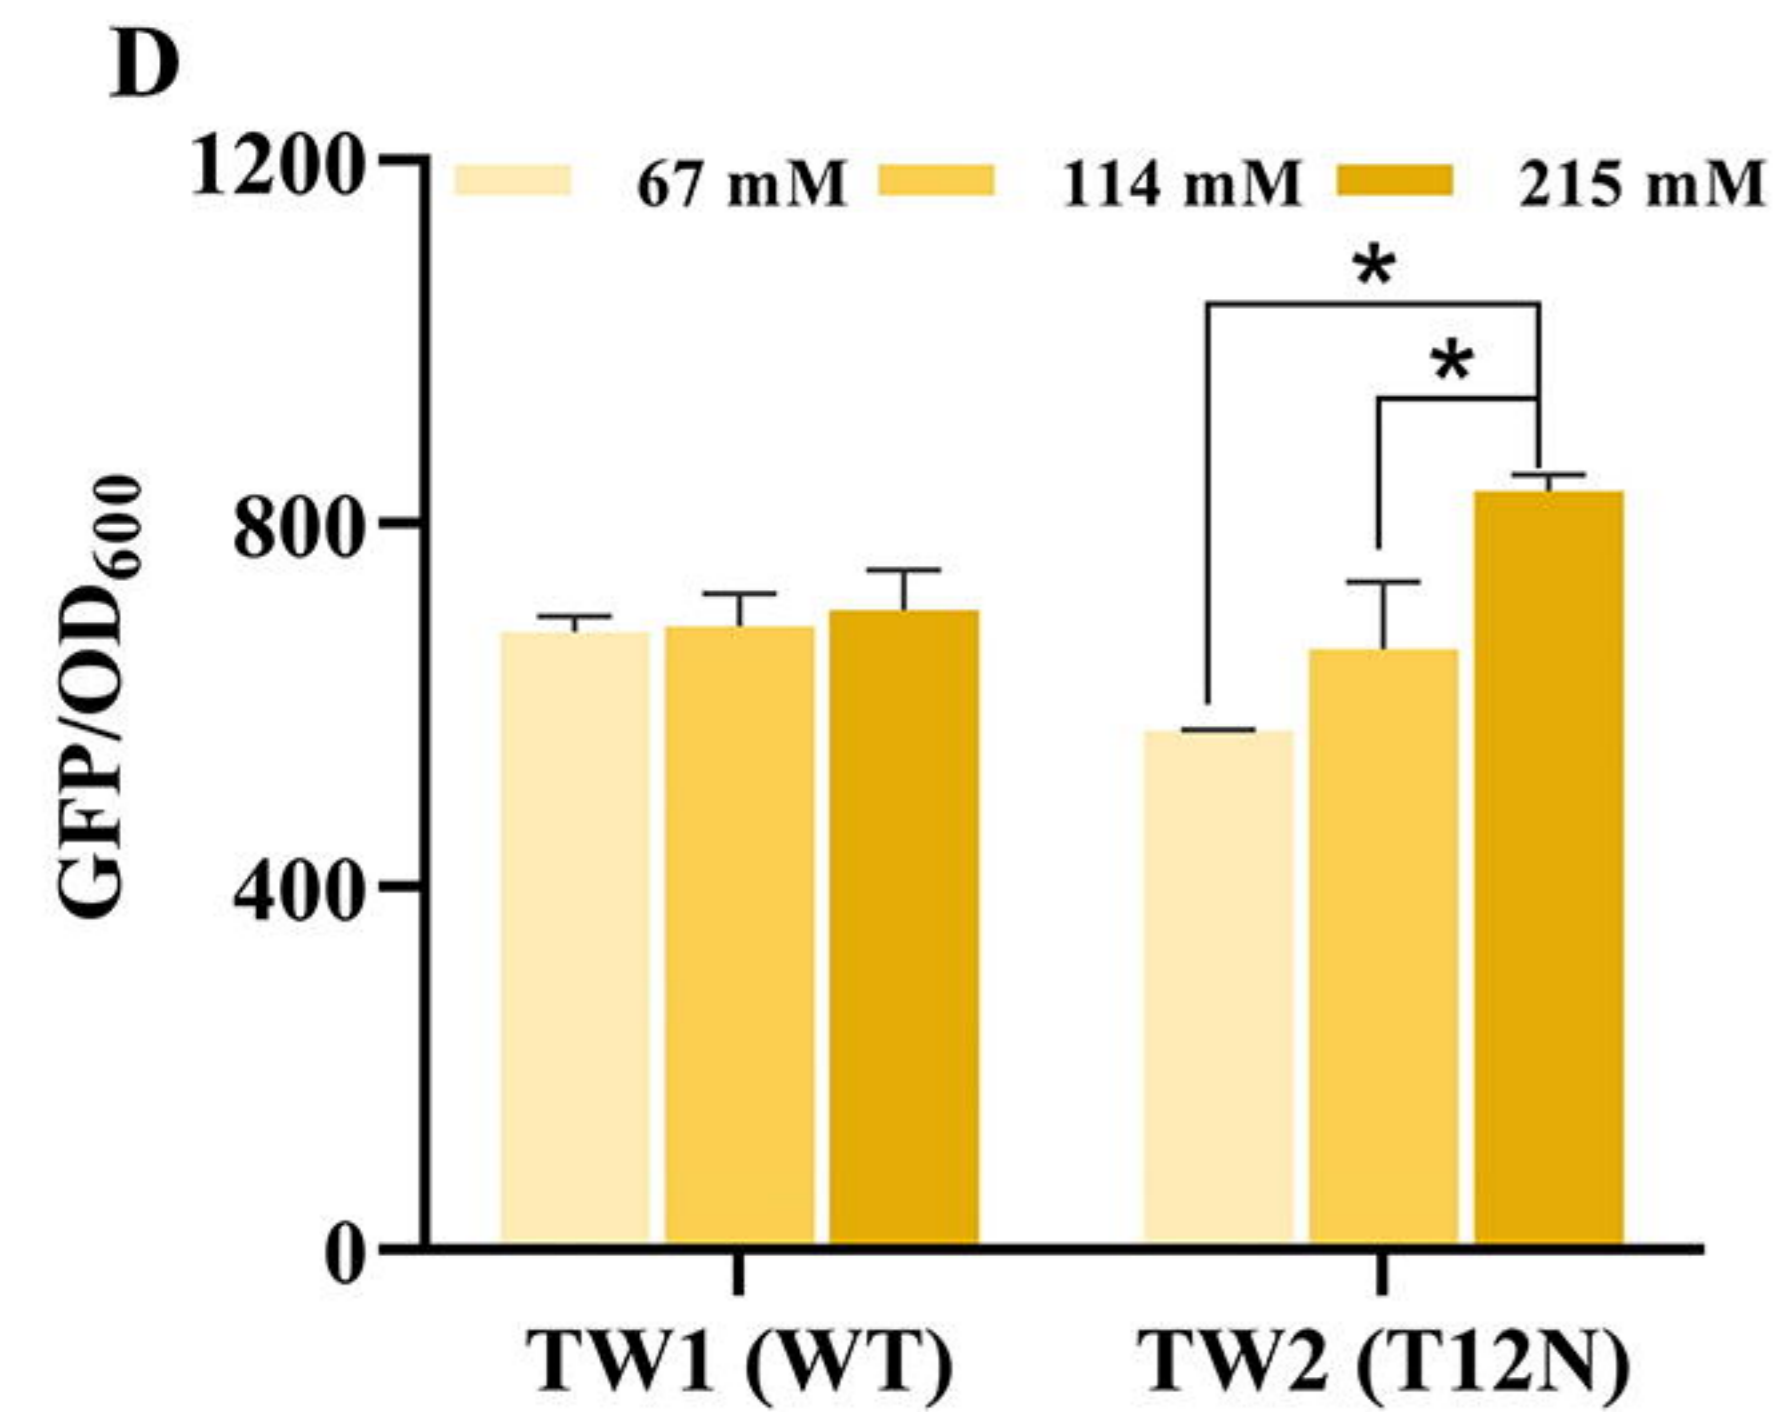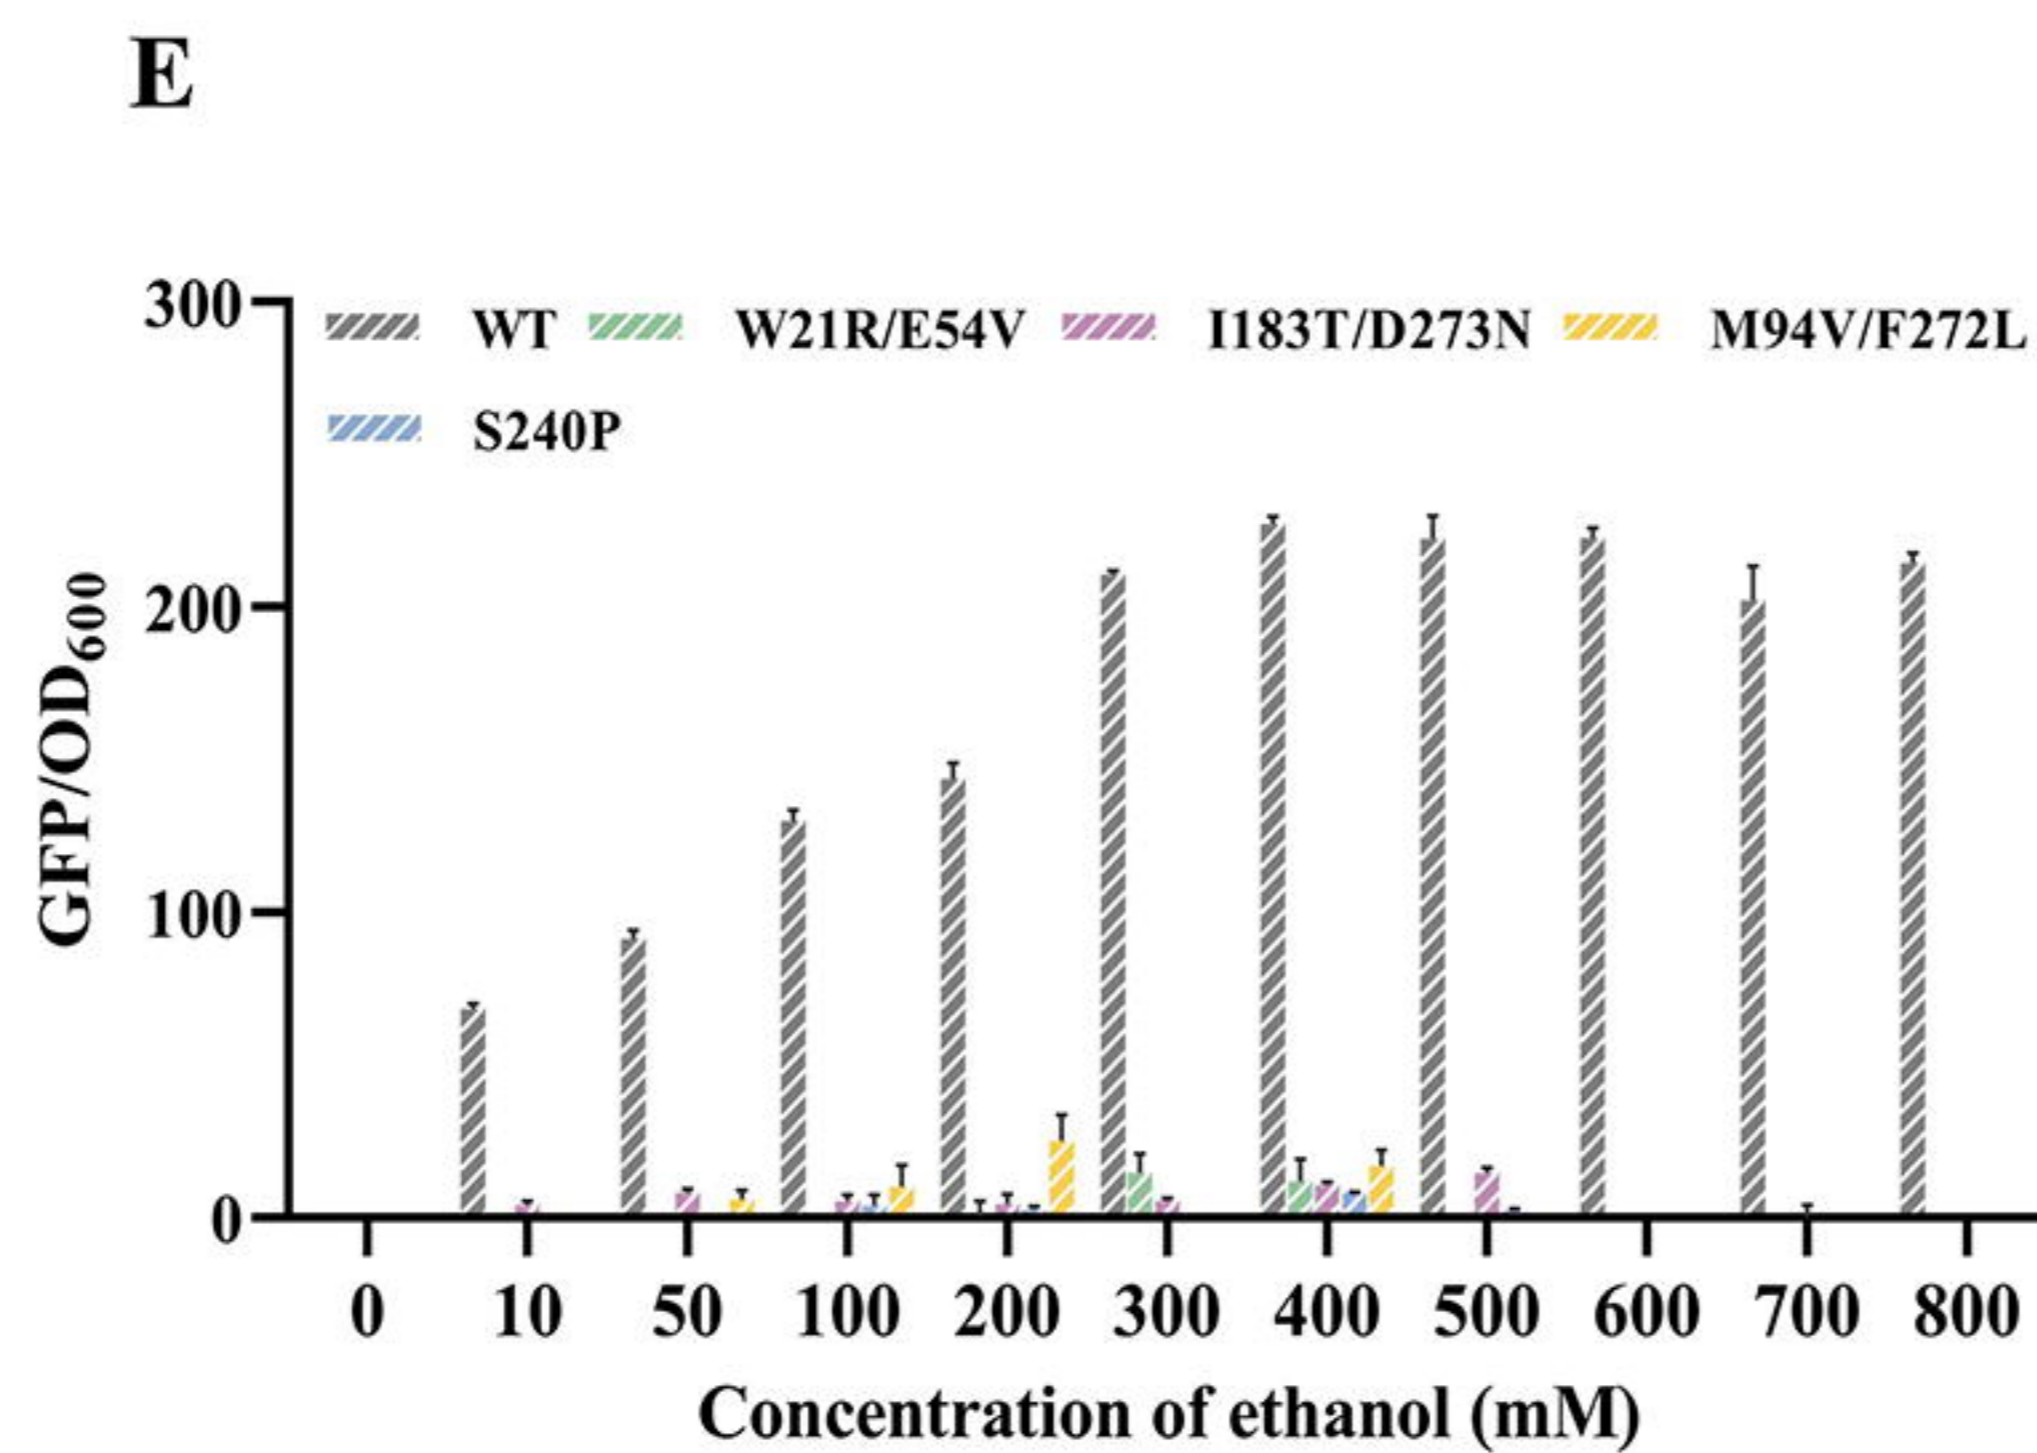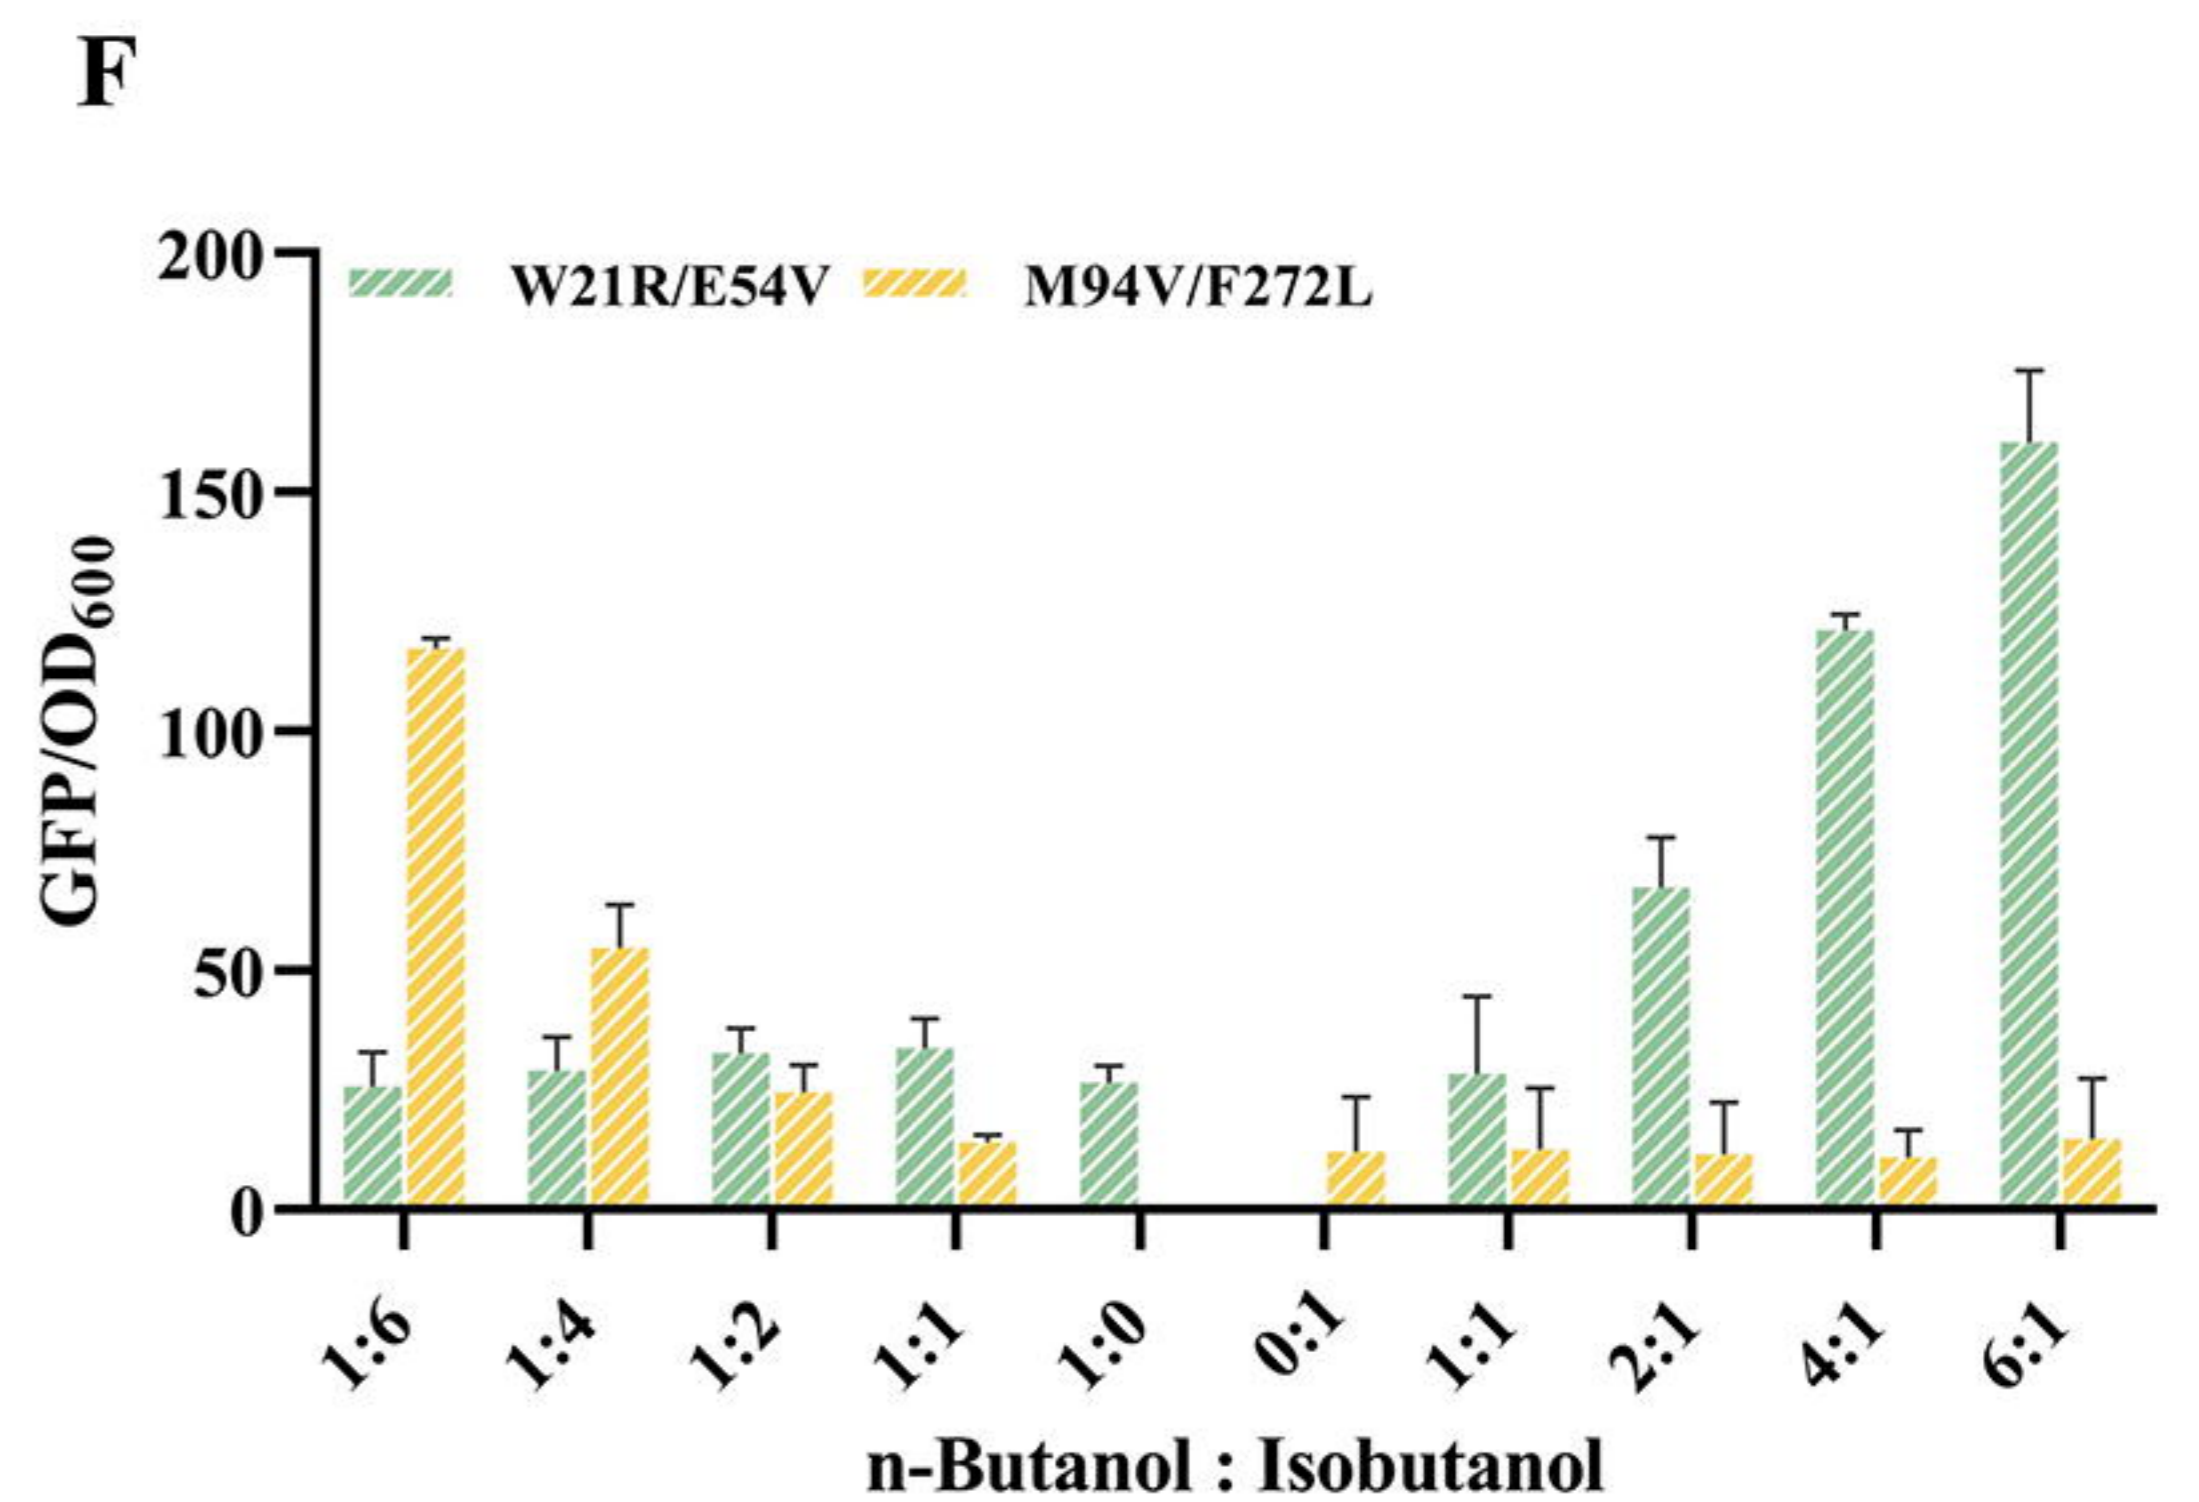

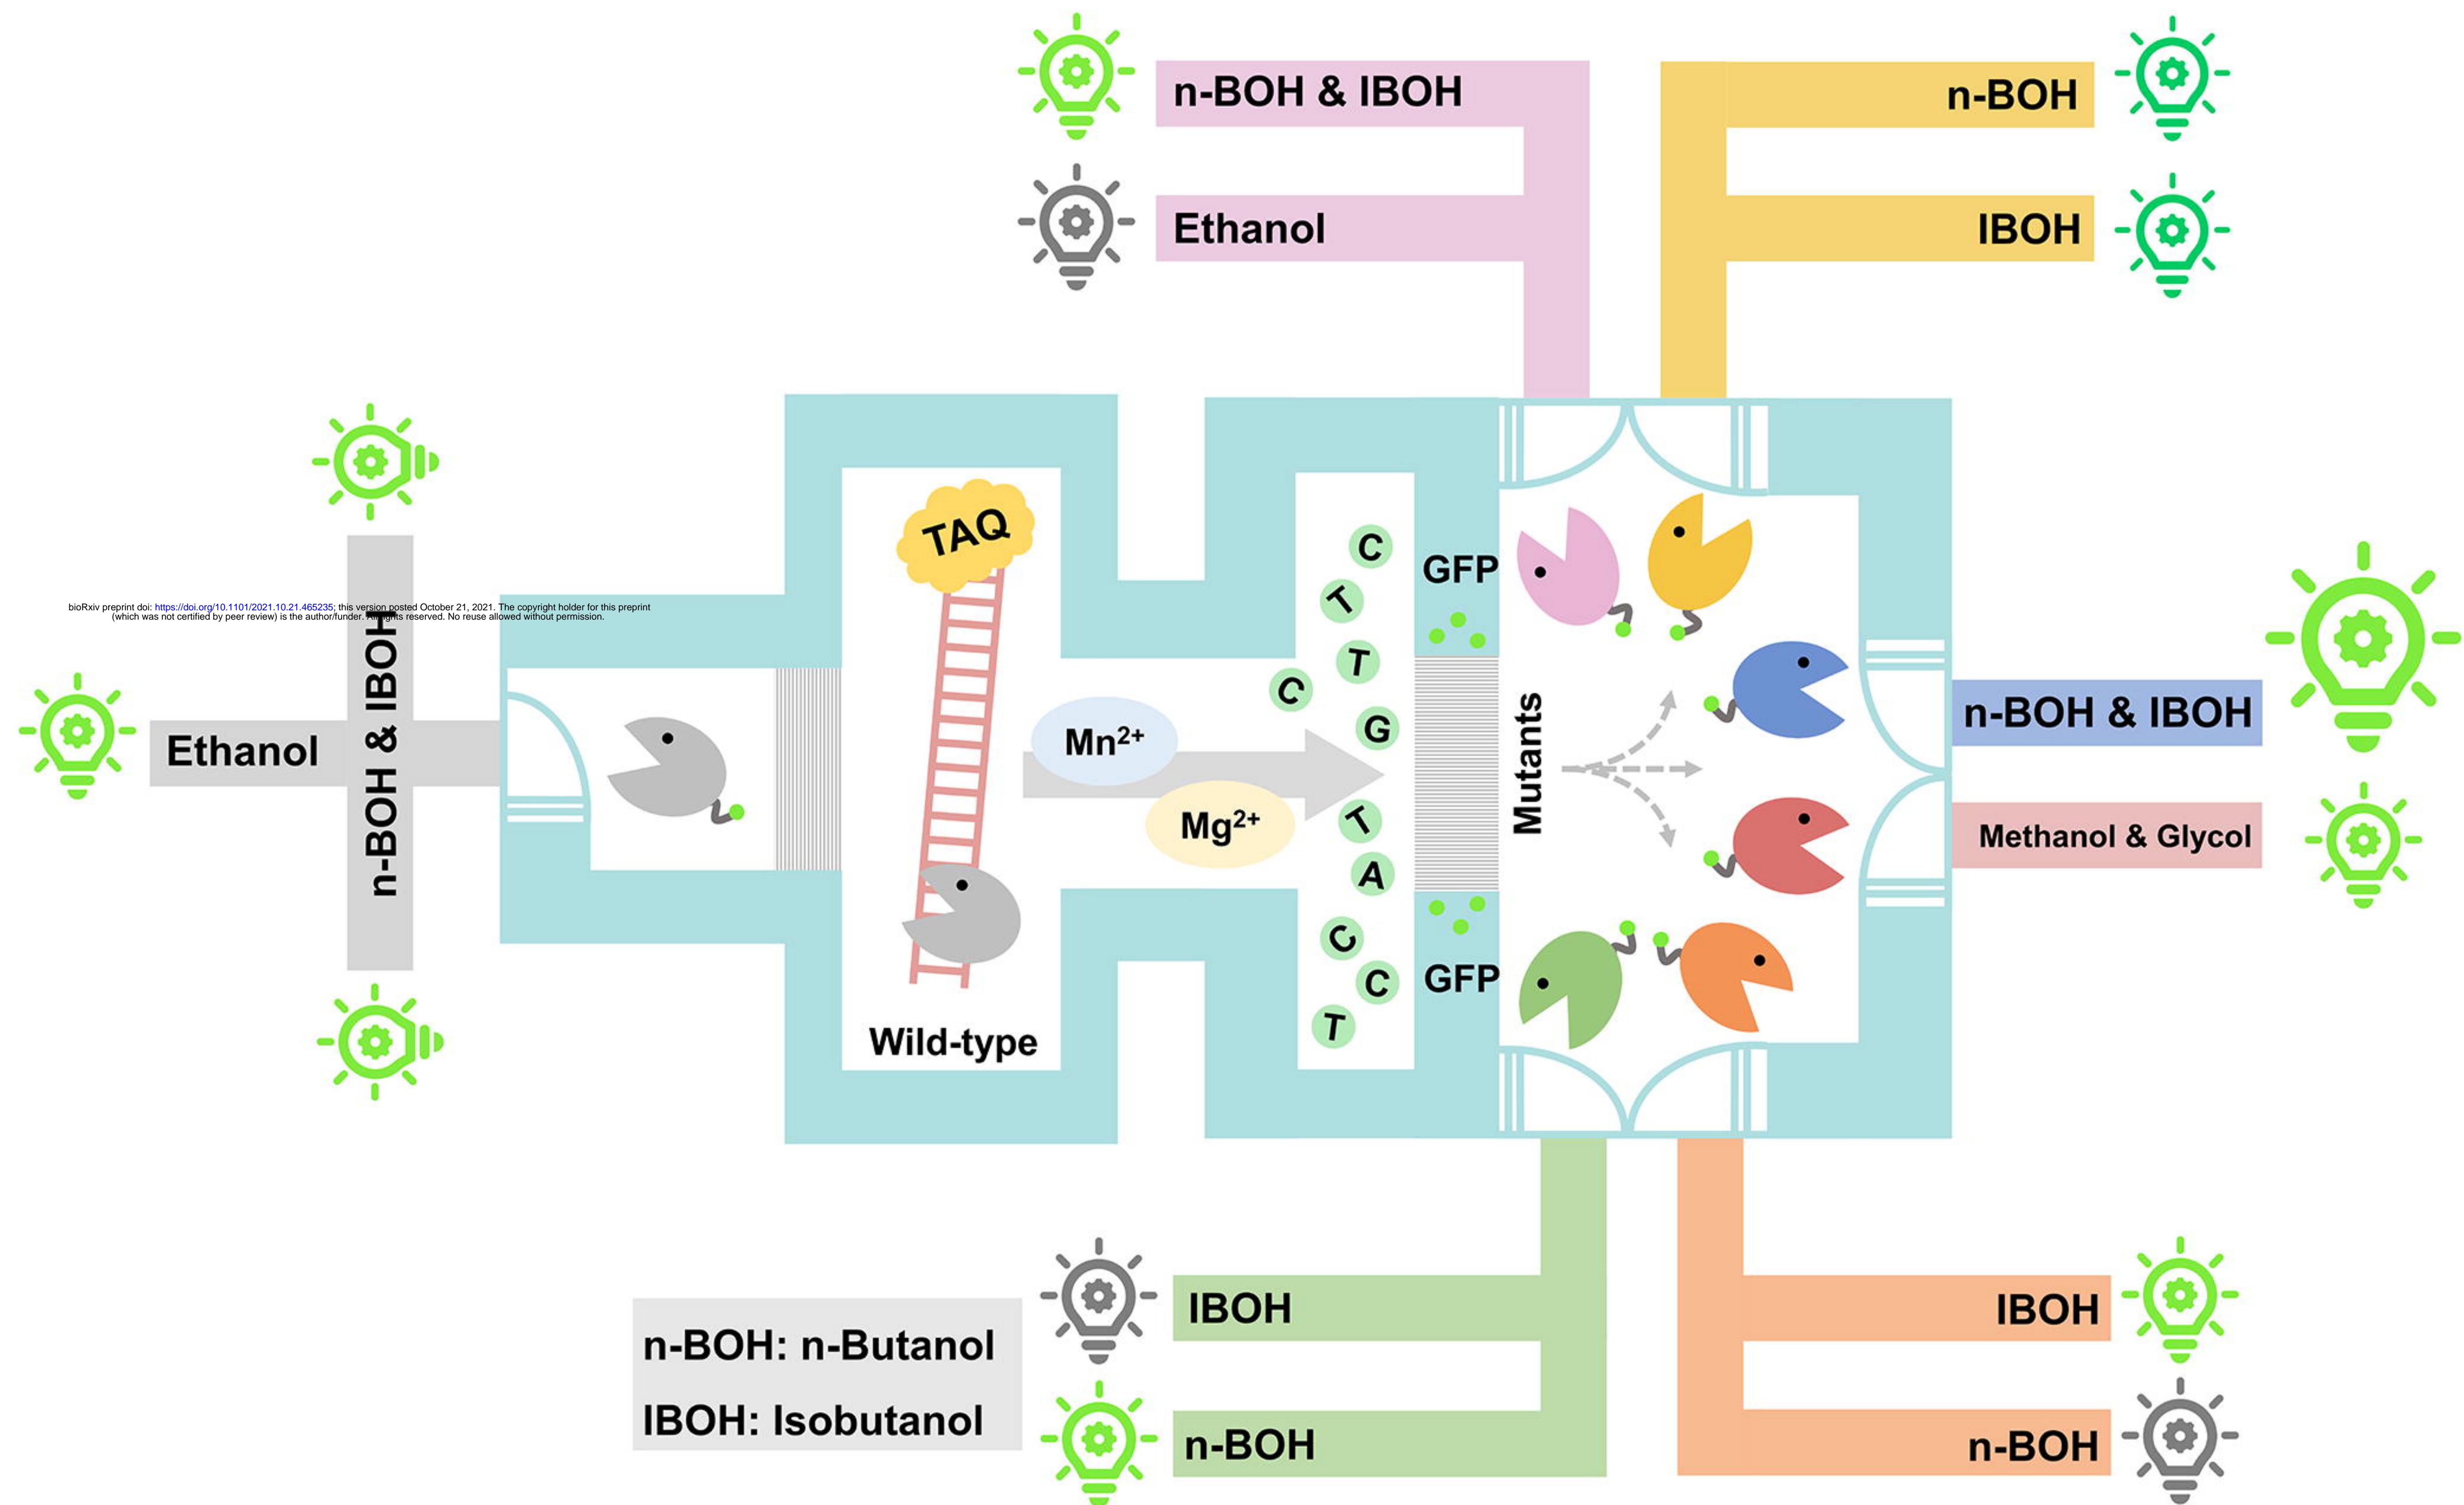

Source: http://biorxiv.org/content/10.1101/2021.10.21.465235v1.full.pdf
